# Supplementary material
Source: publisher figshare collection journal article supplement (https://acs.figshare.com/ndownloader/files/3983158)
Supplement: Supplementary file 1 [file 3983158]

**Supporting Information for**  
**Forcefield\_PTM: *Ab Initio* Charge and AMBER**  
**Forcefield Parameters for Frequently Occurring**  
**Post-Translational Modifications**

George A. Khoury, Jeff P. Thompson, James Smadbeck,

Chris A. Kieslich, and Christodoulos A. Floudas\*

*Department of Chemical and Biological Engineering, Princeton, NJ, USA*

E-mail: floudas@titan.princeton.edu

---

\*To whom correspondence should be addressed

# 1 Supplementary Instructions and Parameters

## 1.1 Instructions for importing new parameters into AMBER

AMBER must be installed and the environment variable \$AMBERHOME must be set to the directory in which AMBER is installed locally. Please see the AMBER manual regarding how to do this. The archive **ffptm.zip** contains all the files related to the forcefield (ffptm.in and all .frcmod files as described below).

Before running any simulations, a user must prepare their protein structure for simulation in AMBER. This is typically done in tleap. The following is the contents of the file **tleap-min.in** which contains the syntax needed to import the parameters to perform calculations using FFPTM's parameterization of Phosphoserine (SEP) on a protein structure containing one or more SEP residues. /DirectoryContainingFFPTM/ refers to the path to the directory containing FFPTM (where **ffptm.zip** is unzipped). In this particular example it contains ffptm.in and SEP.frcmod.

File: tleapmin.in

---

```
source leaprc.ff03.r1  # imports ff03 parameters

# loads FFPTM
loadAmberPrep /DirectoryContainingFFPTM/ffptm.in

# loads any residue-specific parameters needed for SEP
frcmod = loadAmberParams /DirectoryContainingFFPTM/SEP.frcmod

protein = loadpdb test.pdb

check protein

saveamberparm protein test.prmtop test.inpcrd

quit
```

This file produces test.prmtop (a topology/parameter file) and test.inpcrd (an input coordinate file) which are needed by sander or pmemd to perform AMBER simulations.

To call **tleapmin.in** you must use the command:

```
COMMAND: Serial call to tleap
```

---

```
$AMBERHOME/bin/tleap -f tleapmin.in
```

Note, if your structure has multiple post-translational modifications, you may add more lines to tleapmin.in as per the following command example.

```
COMMAND: Example of how to load in multiple frcmod files to tleapmin.in
```

---

```
$AMBERHOME/bin/tleap -f tleapmin.in
```

```
frcmoda = loadAmberParams /DirectoryContainingFFPTM/SEP.frcmod
```

```
frcmodb = loadAmberParams /DirectoryContainingFFPTM/M3L.frcmod
```

Using the newly created prmtop and inpcrd files generated using **tleapmin.in**, you can now perform a local minimization of your protein containing one or more SEP residues using the following file min1.in.

```
File: min1.in
```

---

```
Stage 1 - minimization of structure
```

```
&cntrl
```

```
imin = 1, maxcyc = 10000, ncyc = 6000,
```

```
cut = 16., rgbmax = 16., igb=5, ntb = 0,
```

```
ntpr = 100,
```

```
/
```

To perform the minimization, you must call sander or pmemd. The following calls sander to minimize the structure prepared above.

COMMAND: Serial call to sander

---

```
$AMBERHOME/exe/sander -O -i min1.in -o min1.out -p test.prmtop -c \
test.inpcrd -r min1.rst -ref test.inpcrd
ambpdb -p test.prmtop <min1.rst > test_min.pdb
```

COMMAND: Parallel call to sander.MPI

---

```
mpirun -np 4 $AMBERHOME/exe/sander.MPI -O -i min1.in -o min1.out -p test.prmtop \
-c test.inpcrd -r min1.rst -ref test.inpcrd
ambpdb -p test.prmtop <min1.rst > test_min.pdb
```

The above commands will produce for you a locally minimized protein structure containing the SEP post-translational modification. A note of caution: please make sure the atoms in the modified residue you are simulating have names matching those atom names in the forcefield parameterization. If the atom names do not match, change the naming in the PDB file to match that in the forcefield. For PTMs contained within the PDB that were parameterized, efforts were undertaken to make sure the atom namings matched. In some cases though, PDB file atom namings were not identical even for the same modification.

One can perform unrestrained molecular dynamics in implicit solvent as was done in this paper by using the following input files to sander.

File: heat1.in

---

```
Stage 1 heating of protein 0 to 50K

&cntrl
  imin=0, irest=0, ntx=1,
  nstlim=100000, dt=0.0005,
```

```

ntc=2, ntf=2,

ntt=3, gamma_ln = 5,

tempi=0.0, temp0=50.0,

ntpr=50, ntwx=500,

ntb=0, igb=5, ig=-1,

cut=16., rgbmax=16.

/

```

The stepsize can be increased from  $dt=0.0005$  to  $0.002$  if the user wishes. The protein can be subsequently heated by adapting the file above and creating the temperature intervals 50-100, 100-150, 150-200, 200-250, 250-300. Then, the protein can be submitted for production using the input file below.

File: prod.in

---

```

Production run implicit solvent 0-5ns

```

```

&cntrl

imin=0, irest=1, ntx=5,

nstlim=2500000, dt=0.002,

ntc=2, ntf=2,

ntt=3, gamma_ln = 5,

tempi=300.0, temp0=300.0,

ntpr=500, ntwx=500,

ntb=0, igb=5, ig=-1,

cut=16., rgbmax=16.

/

```

## 1.2 Explanation of contents of AMBER prep file

There are a number of parameters contained in the AMBER prep file which contains the charges calculated in this work. Using the instructions provided, one can easily import the new parameters into AMBER. We present as an example the explanation of the parameters for Anti-symmetric dimethylarginine which is contained in the forcefield.

```
Dimethylarginine (Anti-symmetric) (name of the residue)
dimethylarg.res (Name of the output file generated in from Antechamber)
DA2 INT 0 (Unique 3-letter code naming the amino acid)
CORRECT OMIT DU BEG
0.0000
(1) # of atoms in tree
(2) Unique atom name for atom I
(3) Symbol for atom I which defines its forcefield atom type
and is used in the module PARM for assigning the forcefield parameters
(4) The topological type (tree symbol) for atom I
(5) The atom number to which atom I is connected
(6) The atom number to which atom I makes an angle along with (5)
(7) The atom number which atom I makes a dihedral along with (5) and (6)
(8) The bond length between atoms I and (5)
(9) The bond angle between the bond angle between (6), (5) and (1)
(10) The dihedral angle between (7), (6), (5), and (1)
(11) The partial atomic charge on atom I generated from the RESP-fitting procedure.
```

| (1) | (2)  | (3) | (4) | (5) | (6) | (7) | (8)   | (9)     | (10)    | (11)      |
|-----|------|-----|-----|-----|-----|-----|-------|---------|---------|-----------|
| 1   | DUMM | DU  | M   | 0   | -1  | -2  | 0.000 | .0      | .0      | .00000    |
| 2   | DUMM | DU  | M   | 1   | 0   | -1  | 1.449 | .0      | .0      | .00000    |
| 3   | DUMM | DU  | M   | 2   | 1   | 0   | 1.522 | 111.1   | .0      | .00000    |
| 4   | N    | N   | M   | 3   | 2   | 1   | 1.540 | 111.208 | 180.000 | -0.376741 |

|    |    |    |   |   |   |   |       |         |          |           |
|----|----|----|---|---|---|---|-------|---------|----------|-----------|
| 5  | H  | H  | E | 4 | 3 | 2 | 0.994 | 107.922 | -18.167  | 0.270465  |
| 6  | CA | CT | M | 4 | 3 | 2 | 1.448 | 10.429  | 150.011  | -0.119858 |
| 7  | CB | CT | 3 | 6 | 4 | 3 | 1.539 | 110.455 | 4.603    | -0.129377 |
| 8  | CG | CT | 3 | 7 | 6 | 4 | 1.540 | 113.981 | -168.737 | -0.016346 |
| 9  | CD | CT | 3 | 8 | 7 | 6 | 1.534 | 114.694 | -91.332  | -0.092919 |
| 10 | NE | N2 | B | 9 | 8 | 7 | 1.465 | 112.221 | 171.176  | -0.288262 |

### **1.3 Images of Each Parameterized Post-Translational Modification Grouped by Scaffold Residue**

Images of the HF/6-31G\*\* optimized  $\alpha$ -helical and  $\beta$ -strand conformer of each post-translational modification are presented, grouped by scaffold residue to serve as reference for the presented parameters. The atom names following PDB conventions are labeled for each PTM as well in the  $\alpha$ -helical conformation.



Cysteine Modifications  
Cysteinepersulfide (CSS)  $\alpha$ -conformer

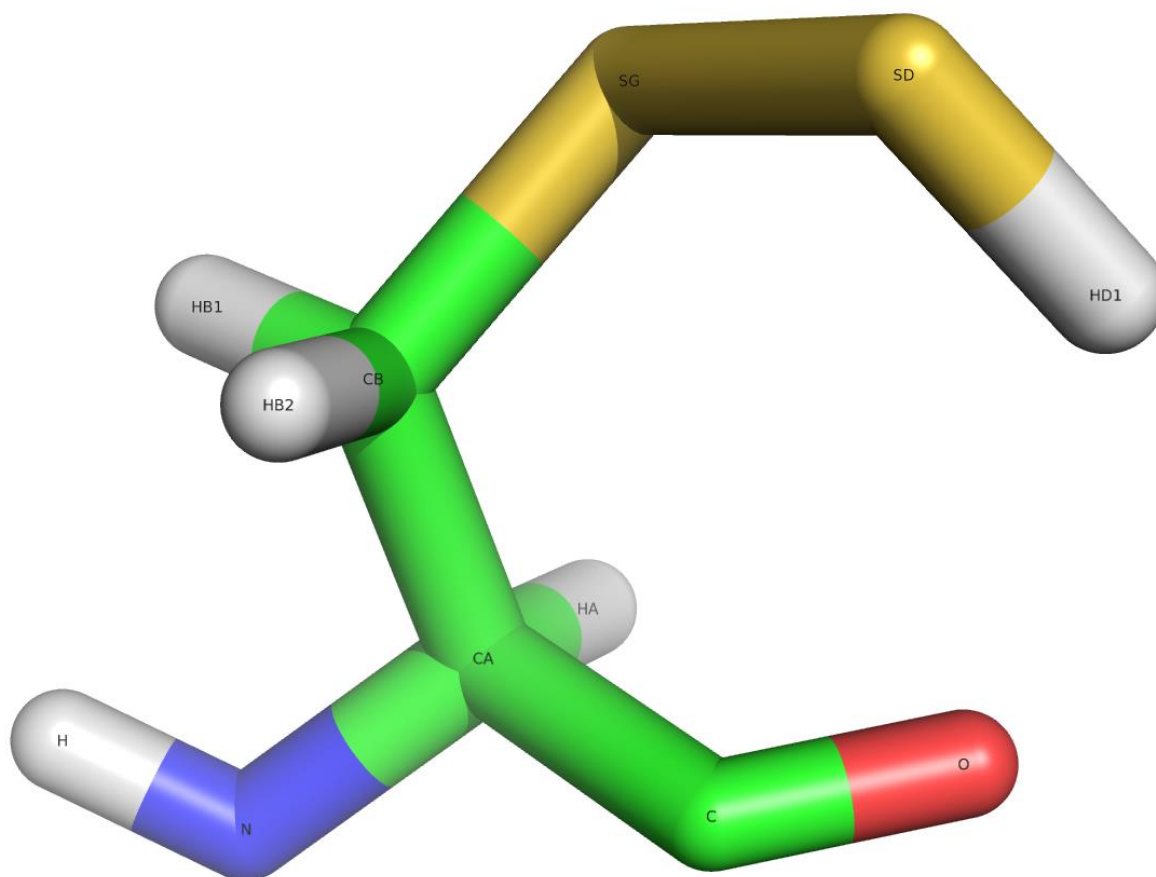

Cysteinepersulfide (CSS)  $\beta$ -conformer

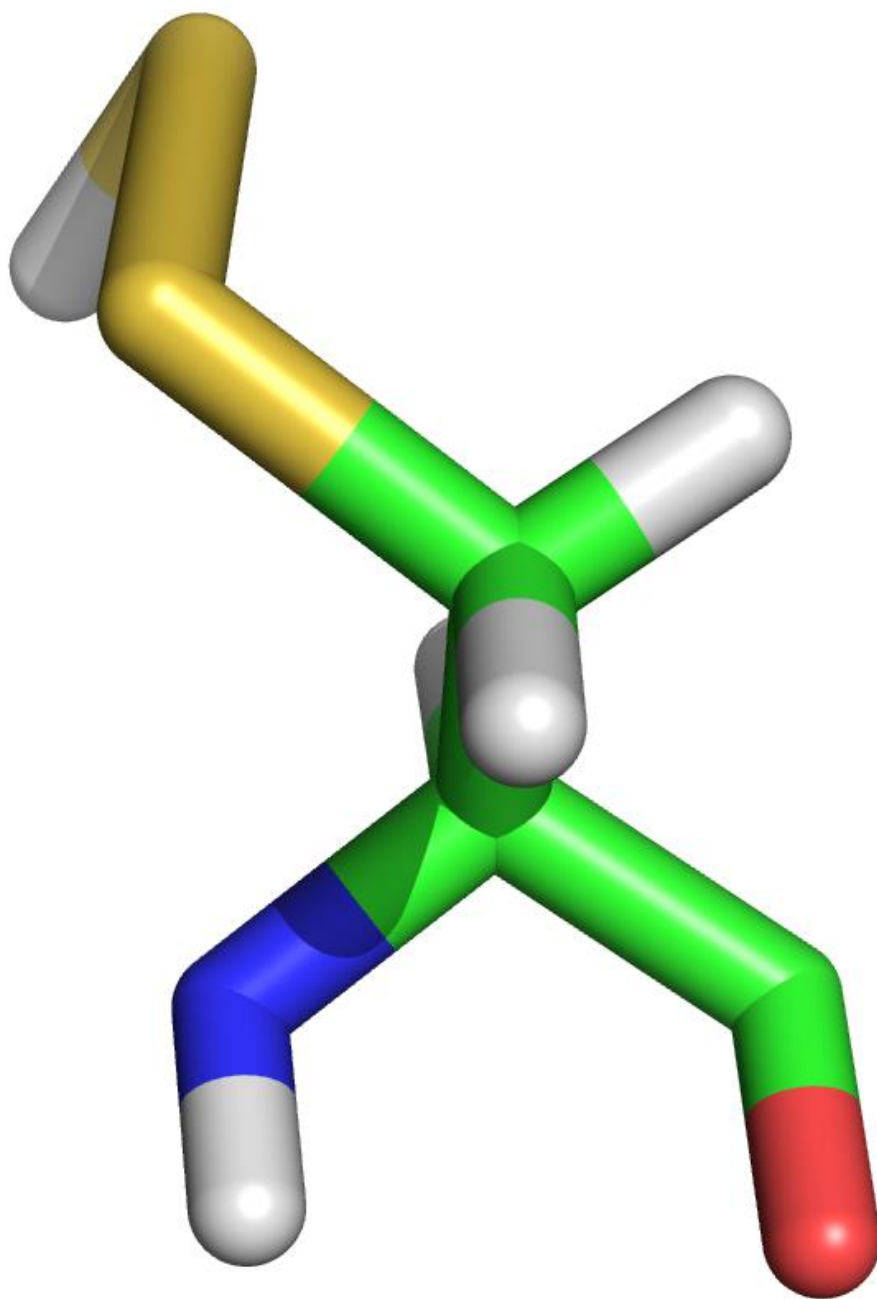

Cysteine sulfenic acid (CSO)  $\alpha$ -conformer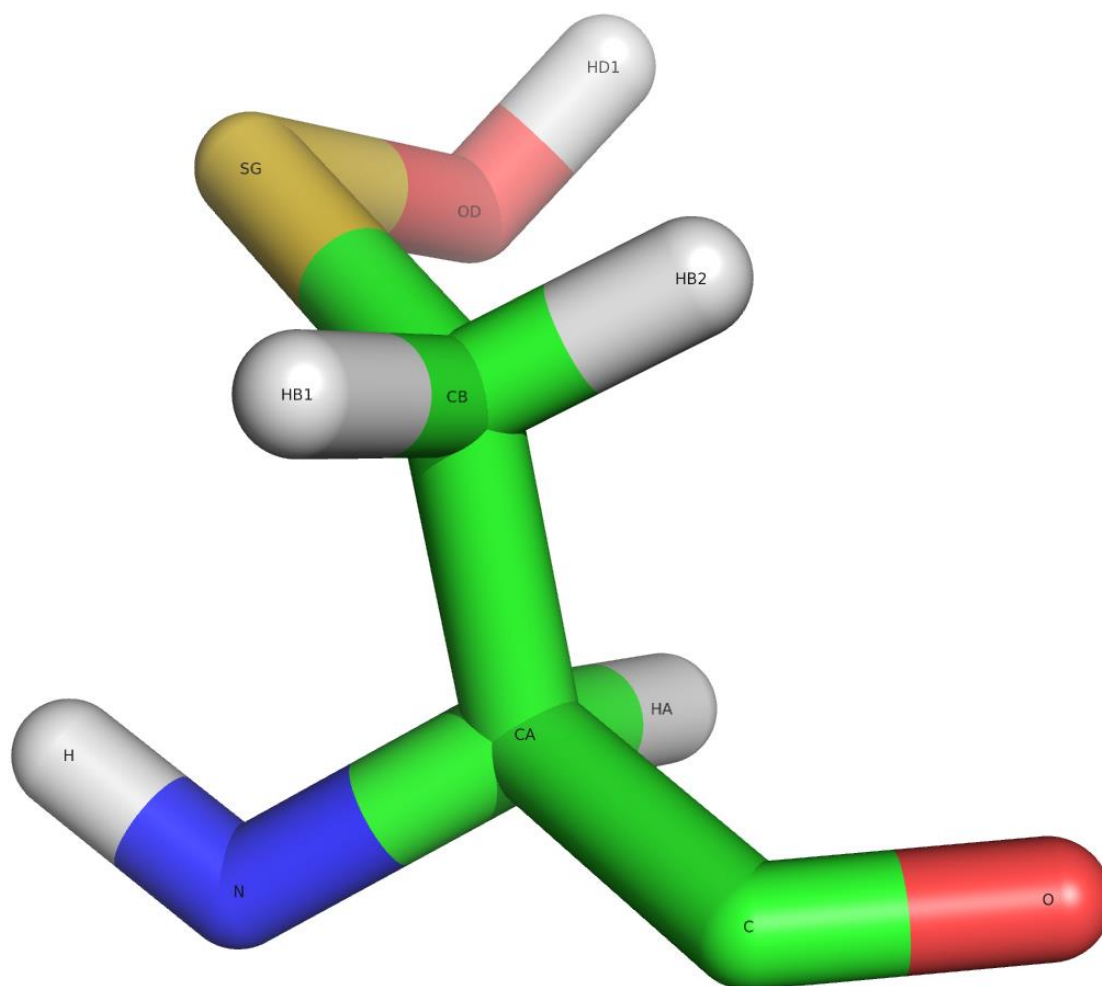

Cysteine sulfenic acid (CSO)  $\beta$ -conformer

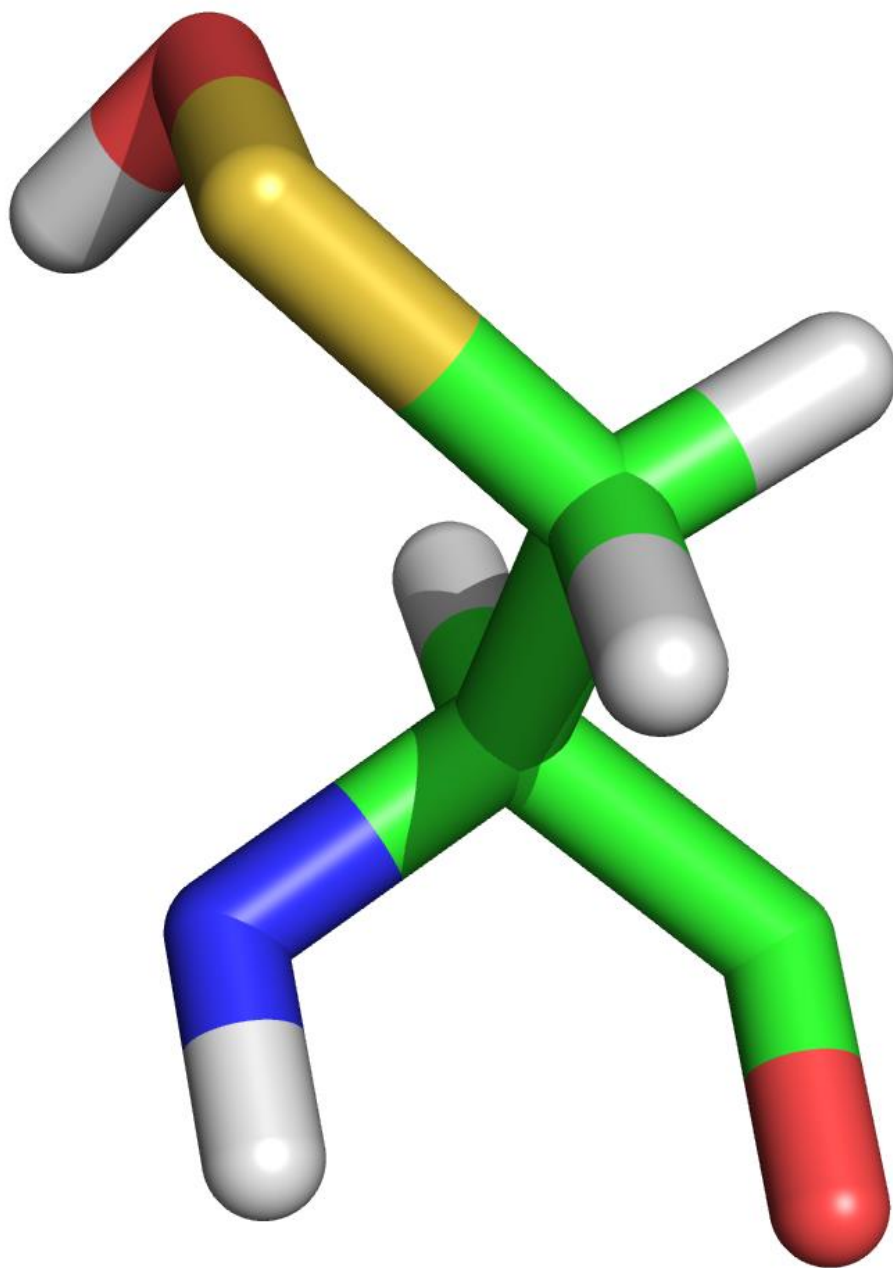

Phosphocysteine (neutral) (CSP)  $\alpha$ -conformer

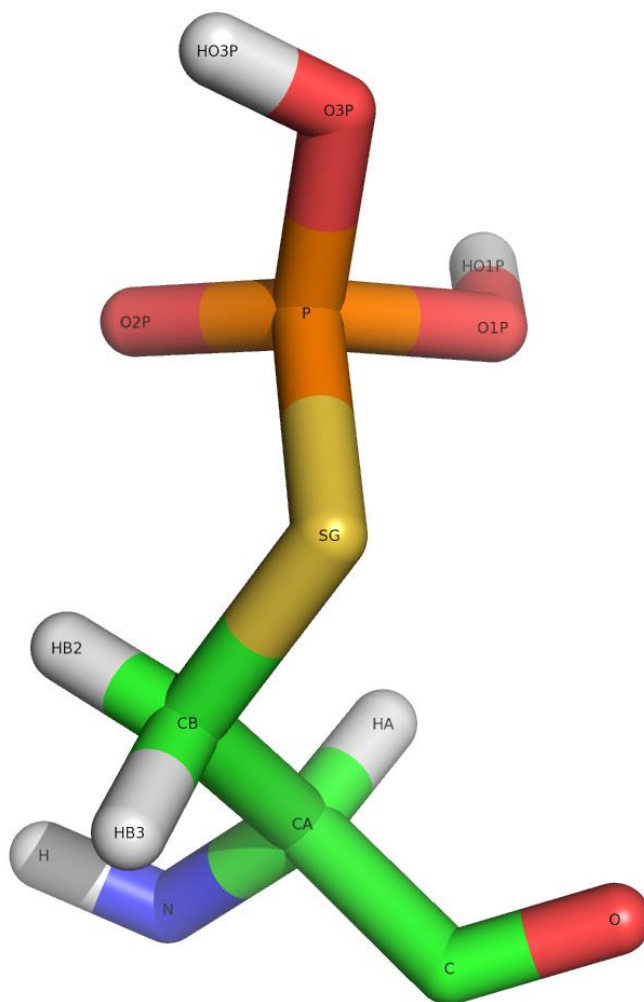

Phosphocysteine (neutral) (CSP)  $\beta$ -conformer

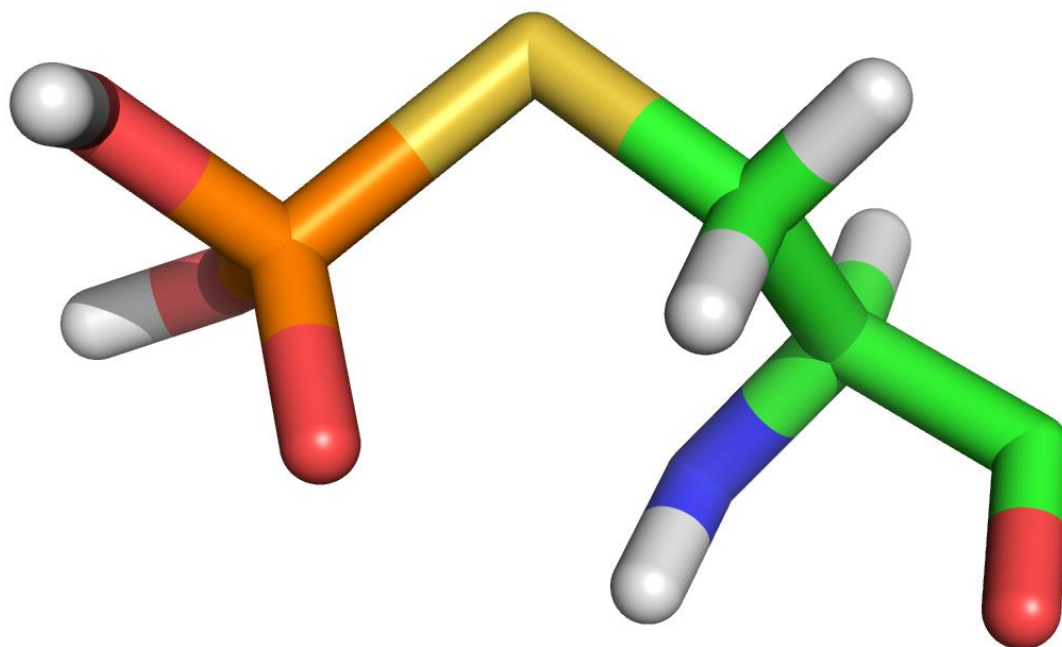

S-farnesylcysteine (FCY)  $\alpha$ -conformer

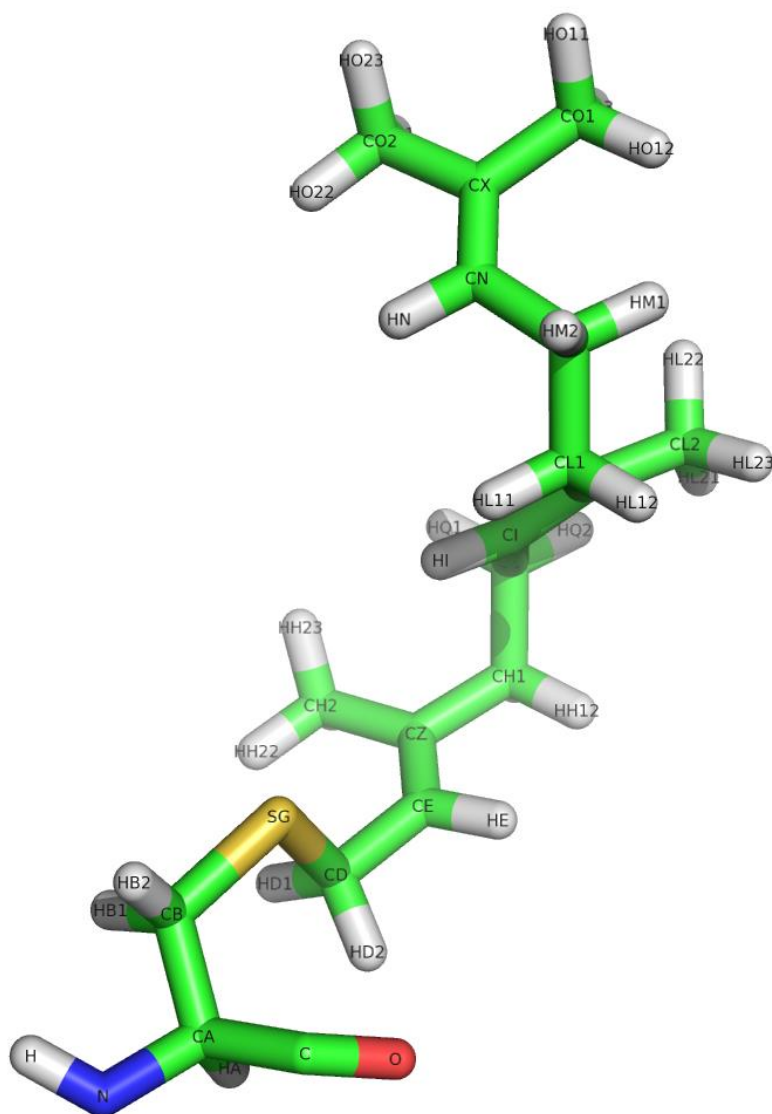

S-farnesylcysteine (FCY)  $\beta$ -conformer

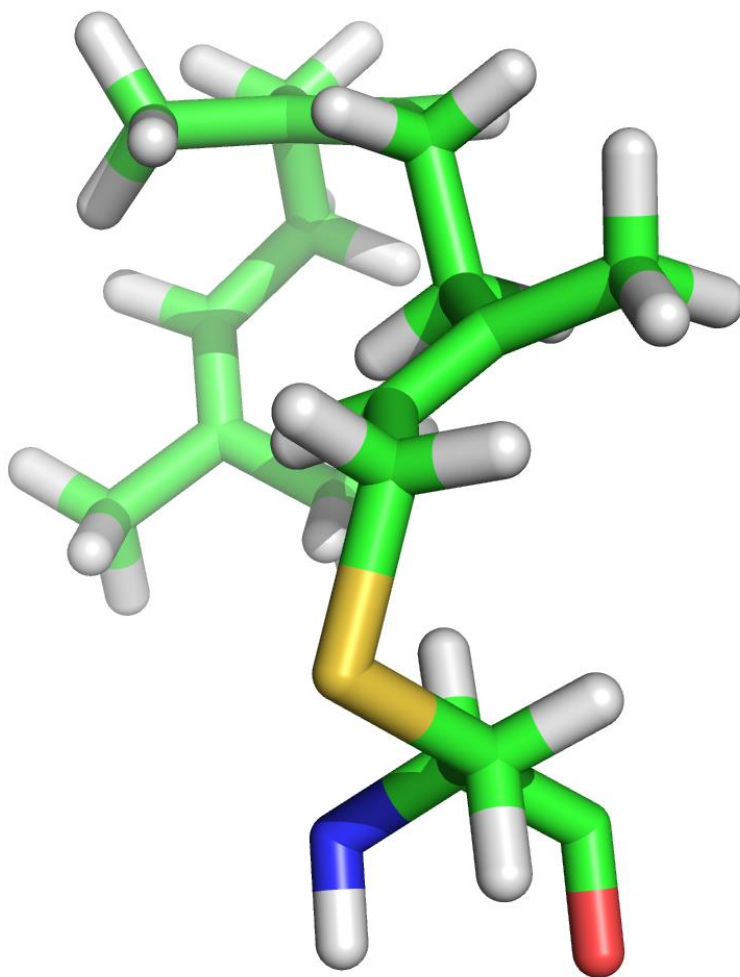



S-geranylgeranylcysteine (GCY)  $\alpha$ -conformer

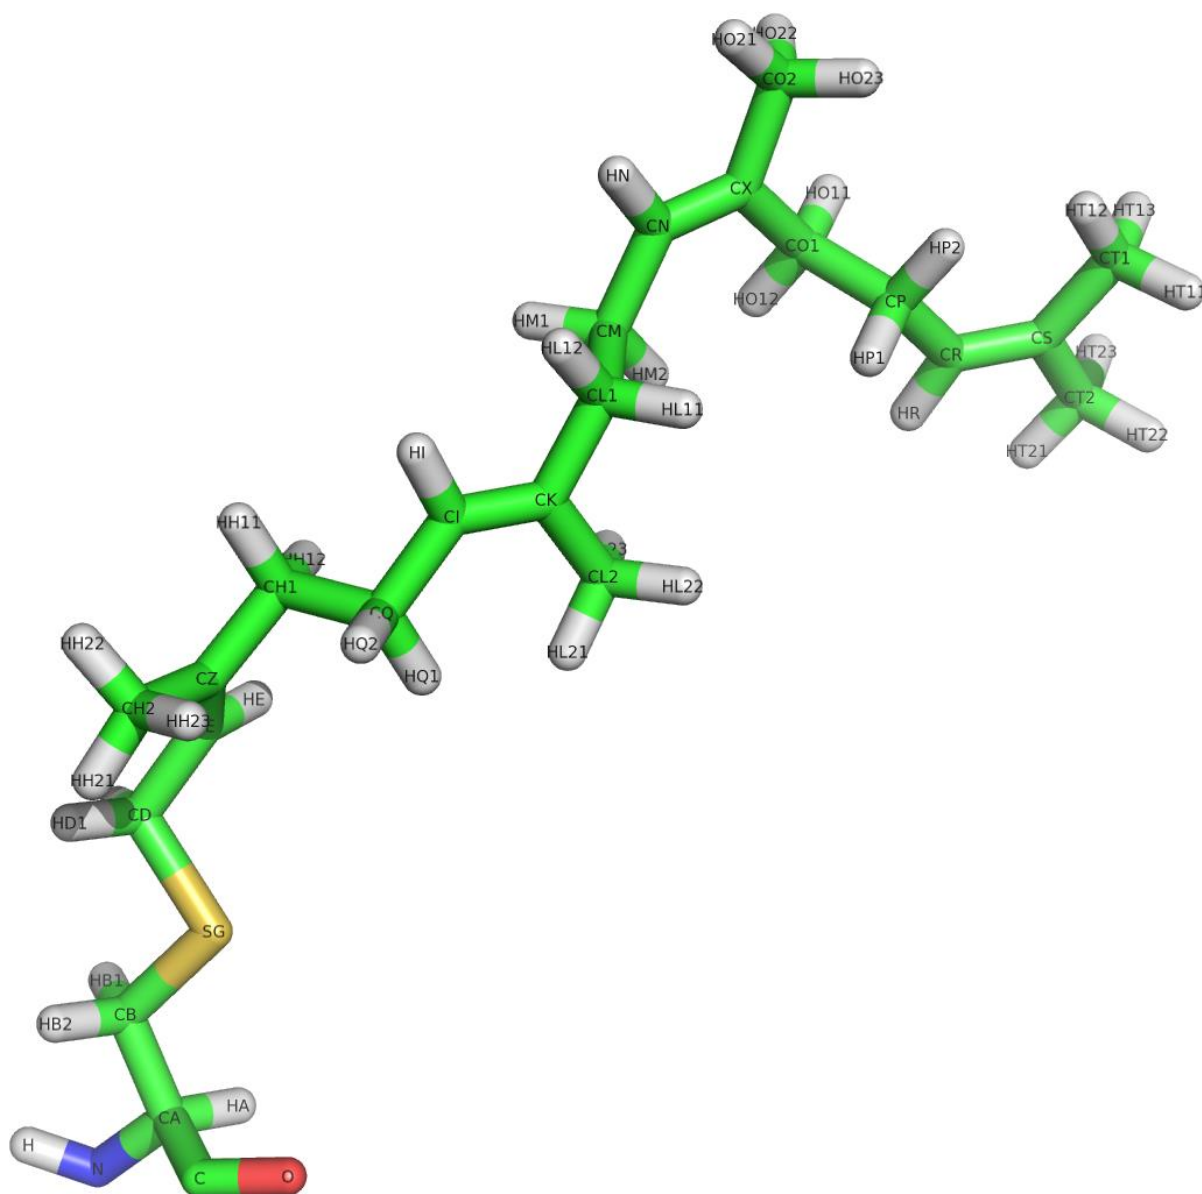

S-geranylgeranylcysteine (GCY)  $\beta$ -conformer

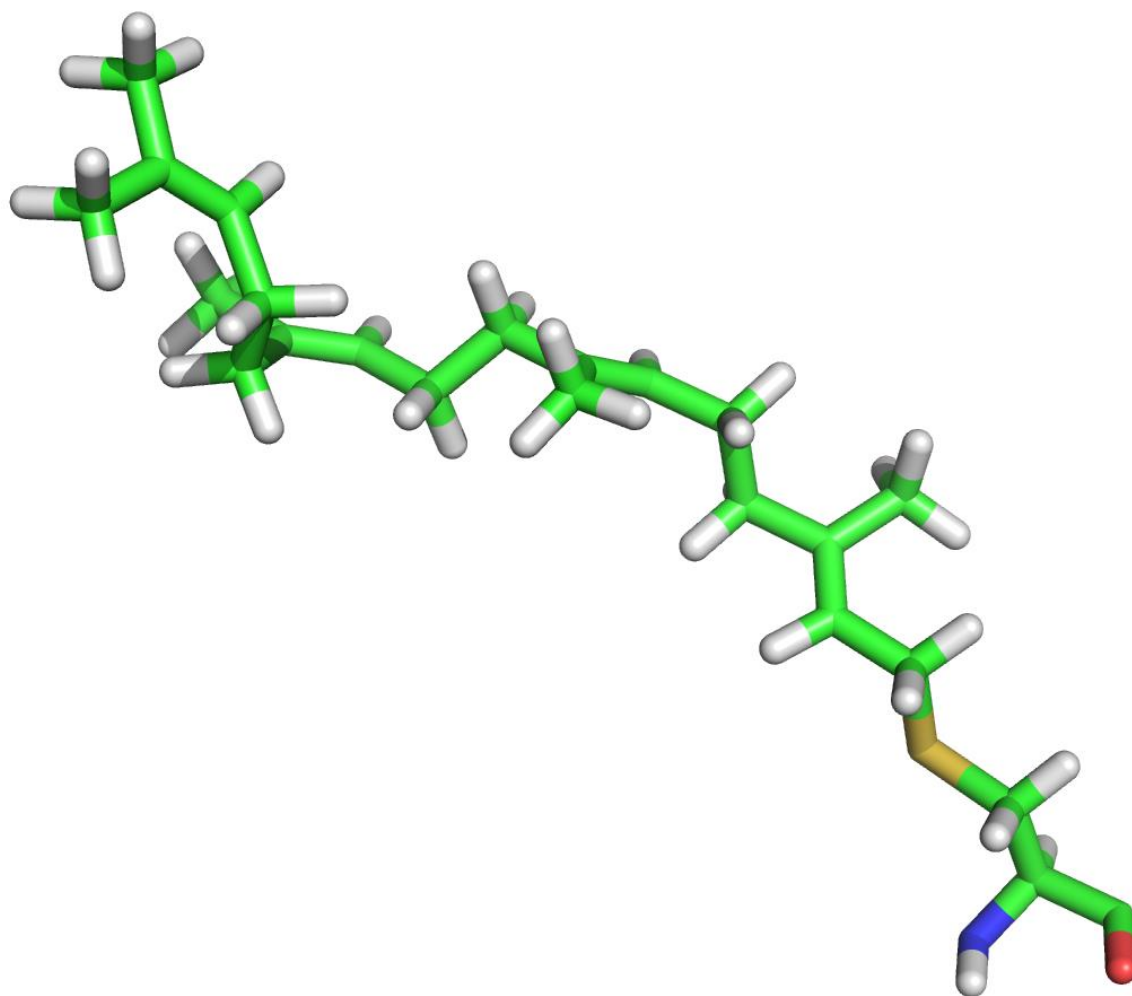

S-palmitoylcysteine (SPC)  $\alpha$ -conformer

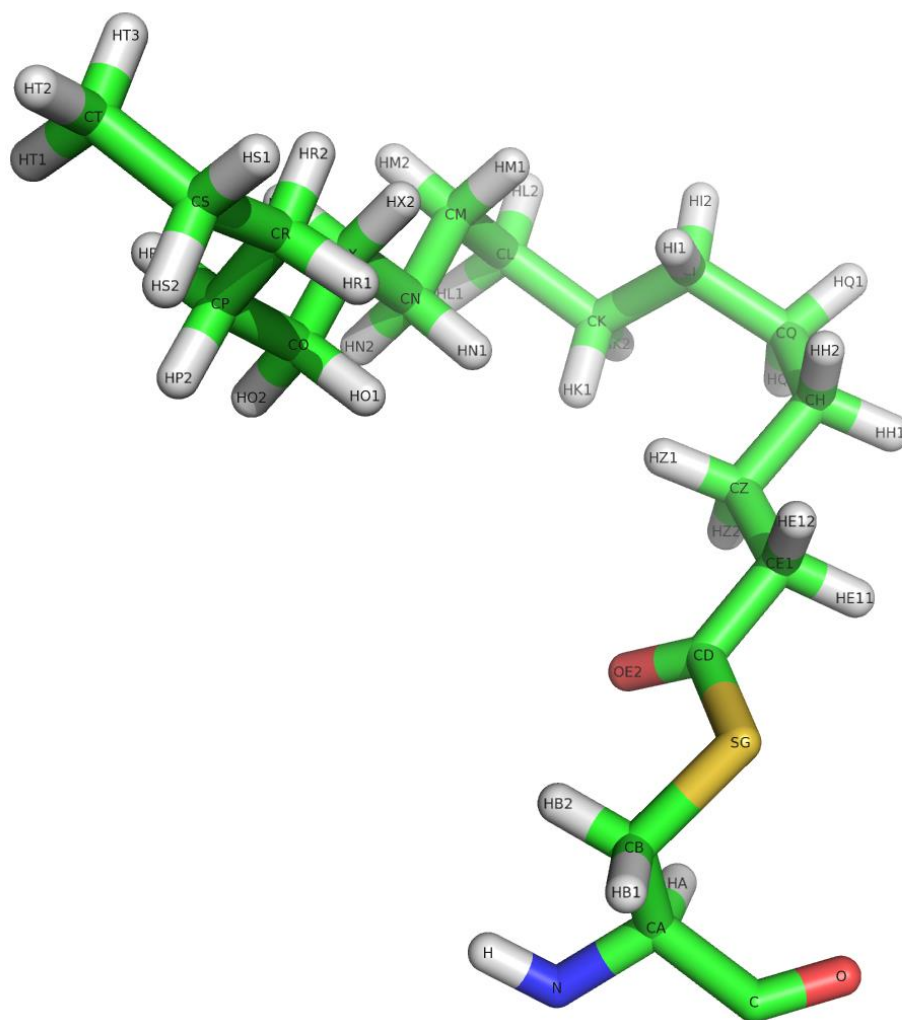

S-palmitoylcysteine (SPC)  $\beta$ -conformer

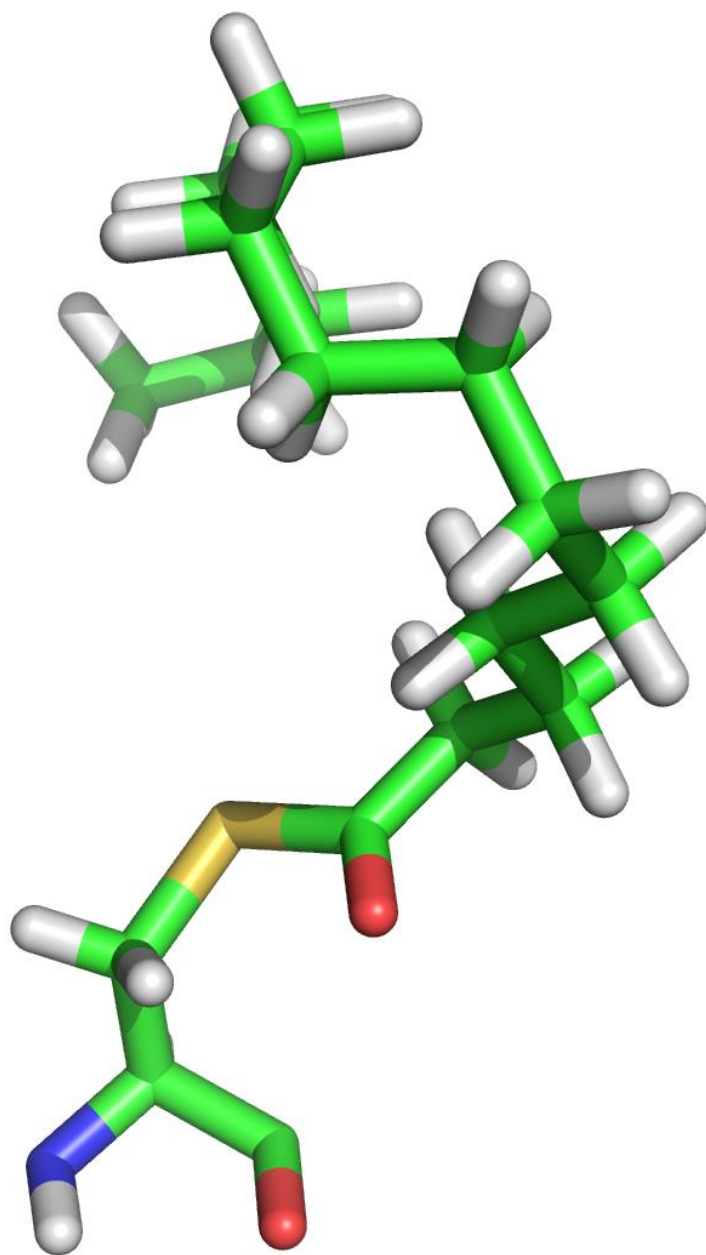

Glutamic Acid Modifications  
1-carboxyglutamic acid (neutral) (CGU)  $\alpha$ -conformer

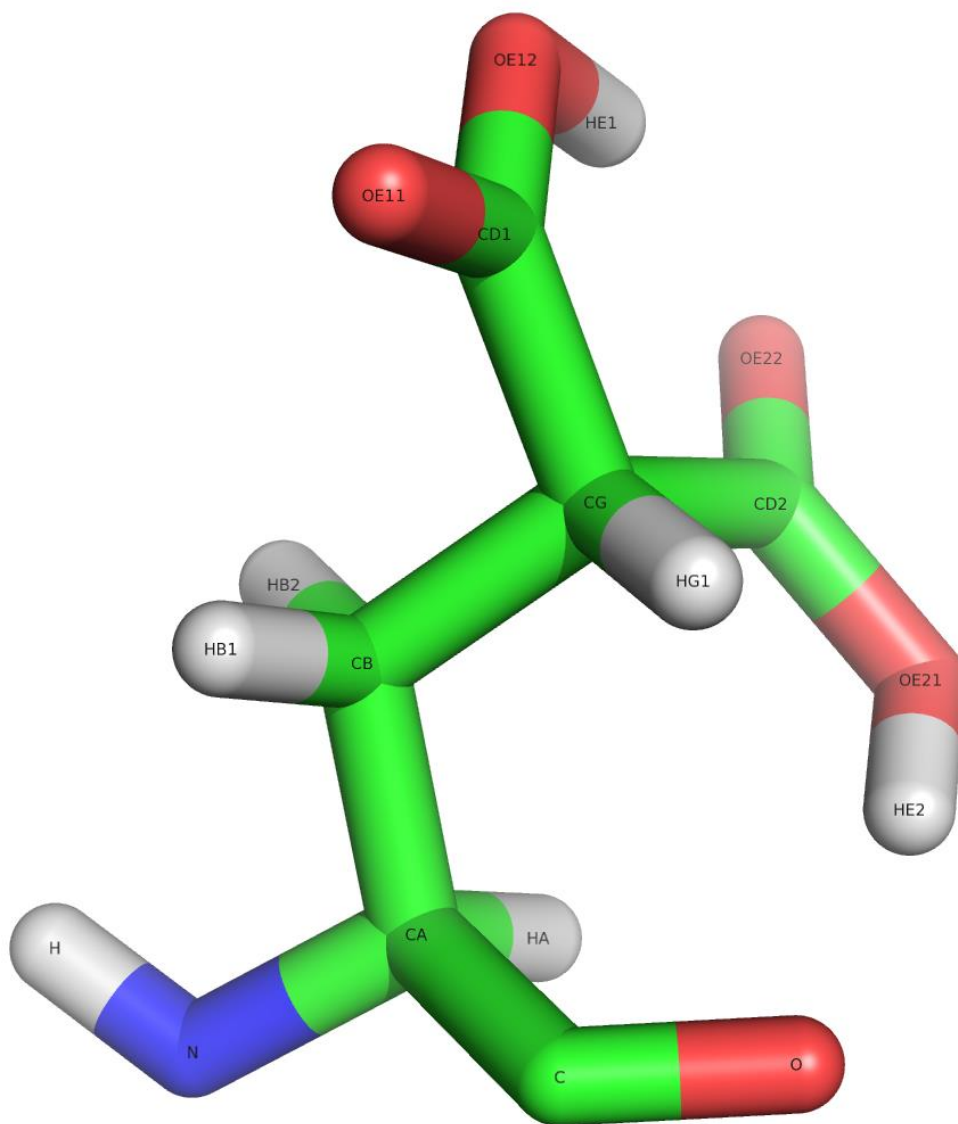

1-carboxyglutamic acid (neutral) (CGU)  $\beta$ -conformer

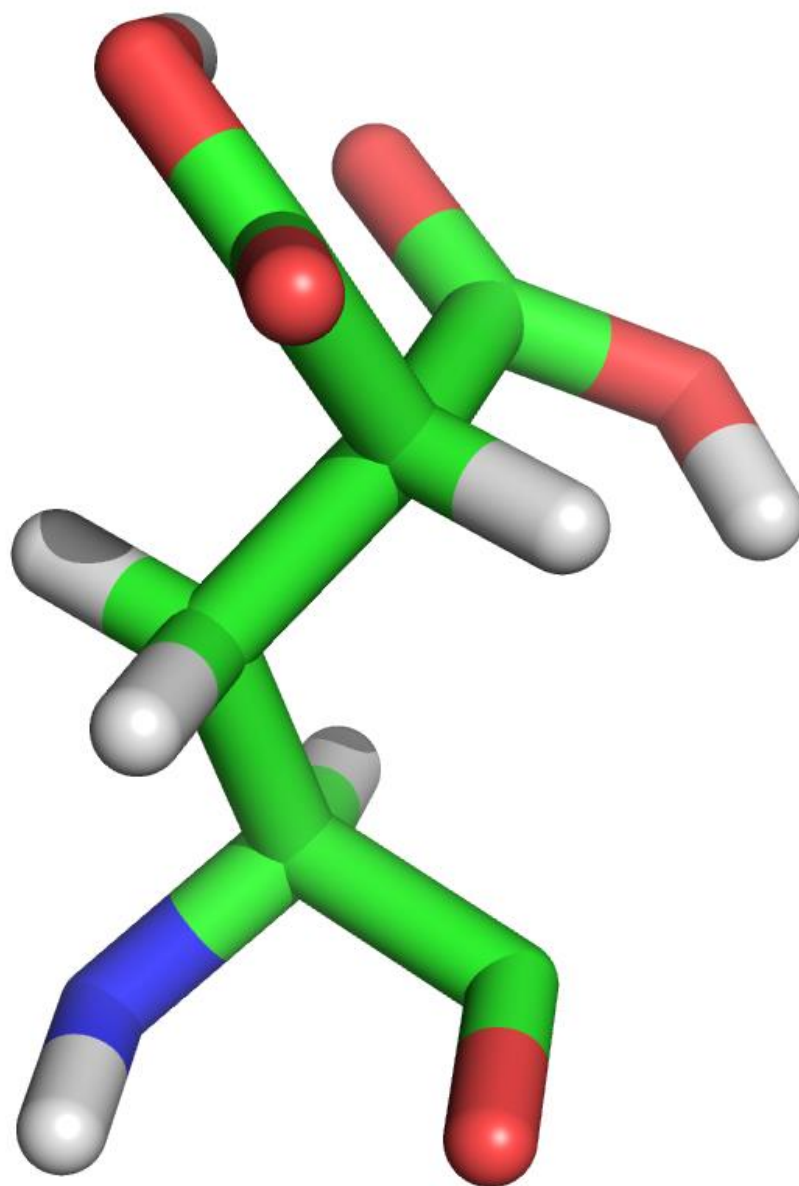

Pyroglutamic Acid (PCA)  $\alpha$ -conformer

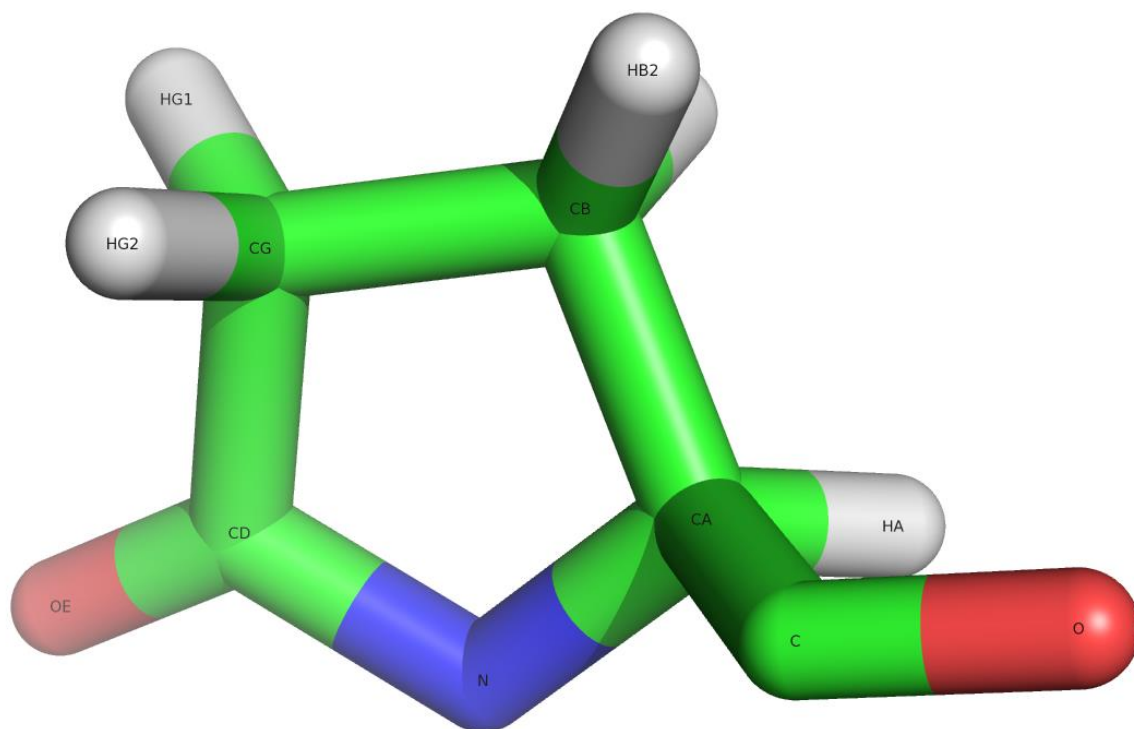

Pyroglutamic Acid (PCA)  $\beta$ -conformer

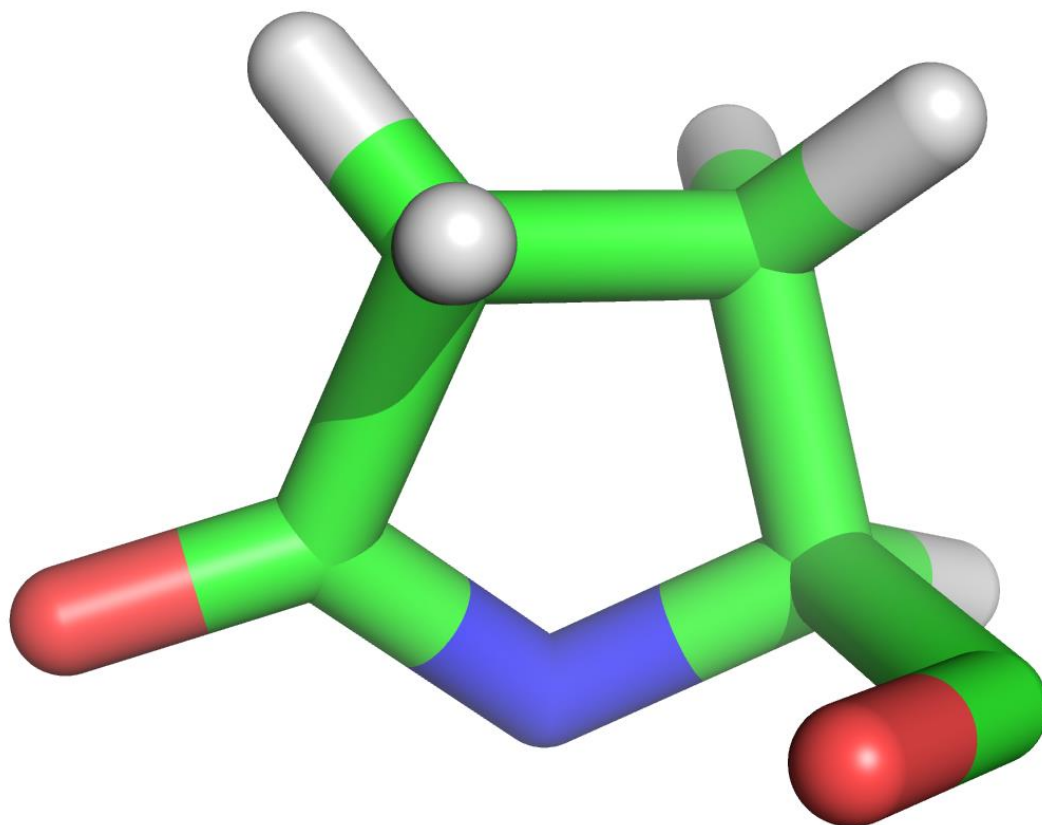





Dihydroxyphenylalanine (DAH)  $\beta$ -conformer

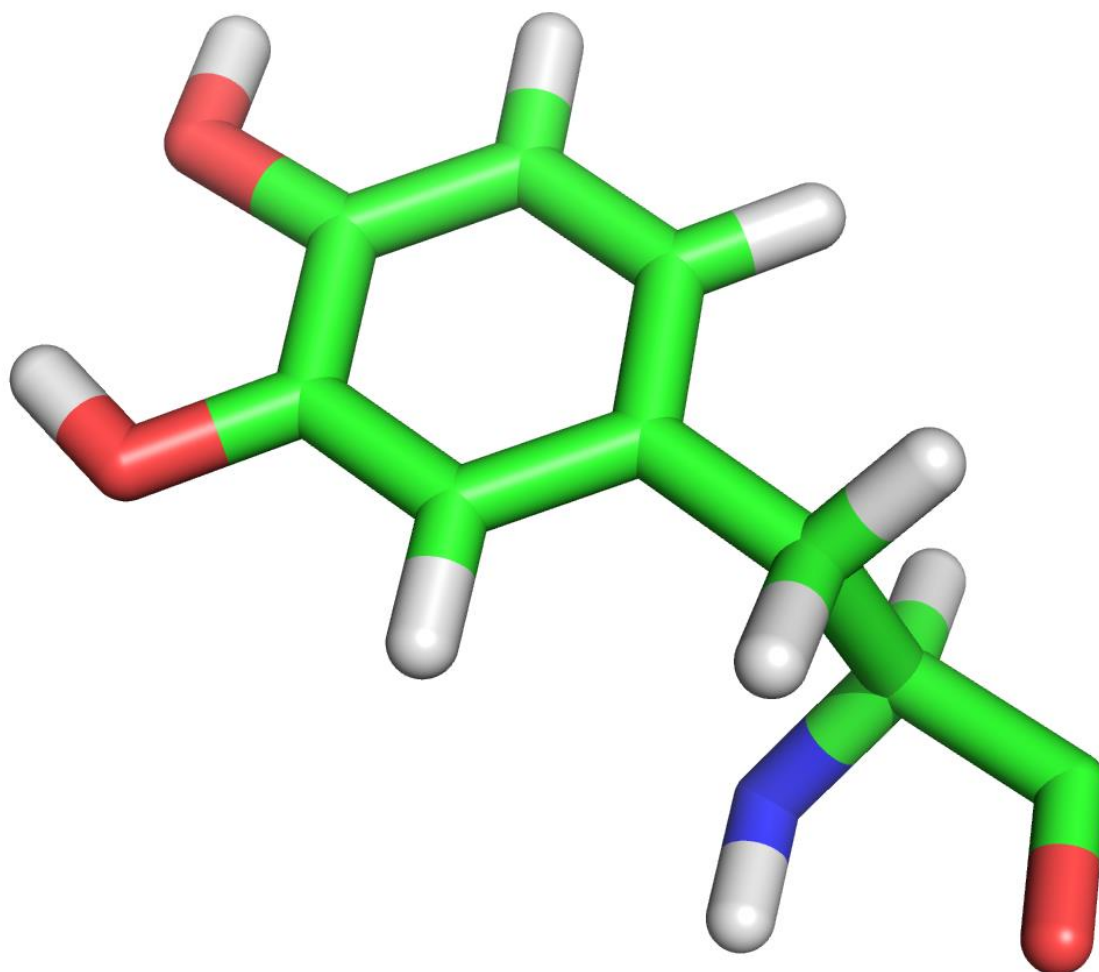

Lysine Modifications  
5-hydroxylysine (LYZ)  $\alpha$ -conformer

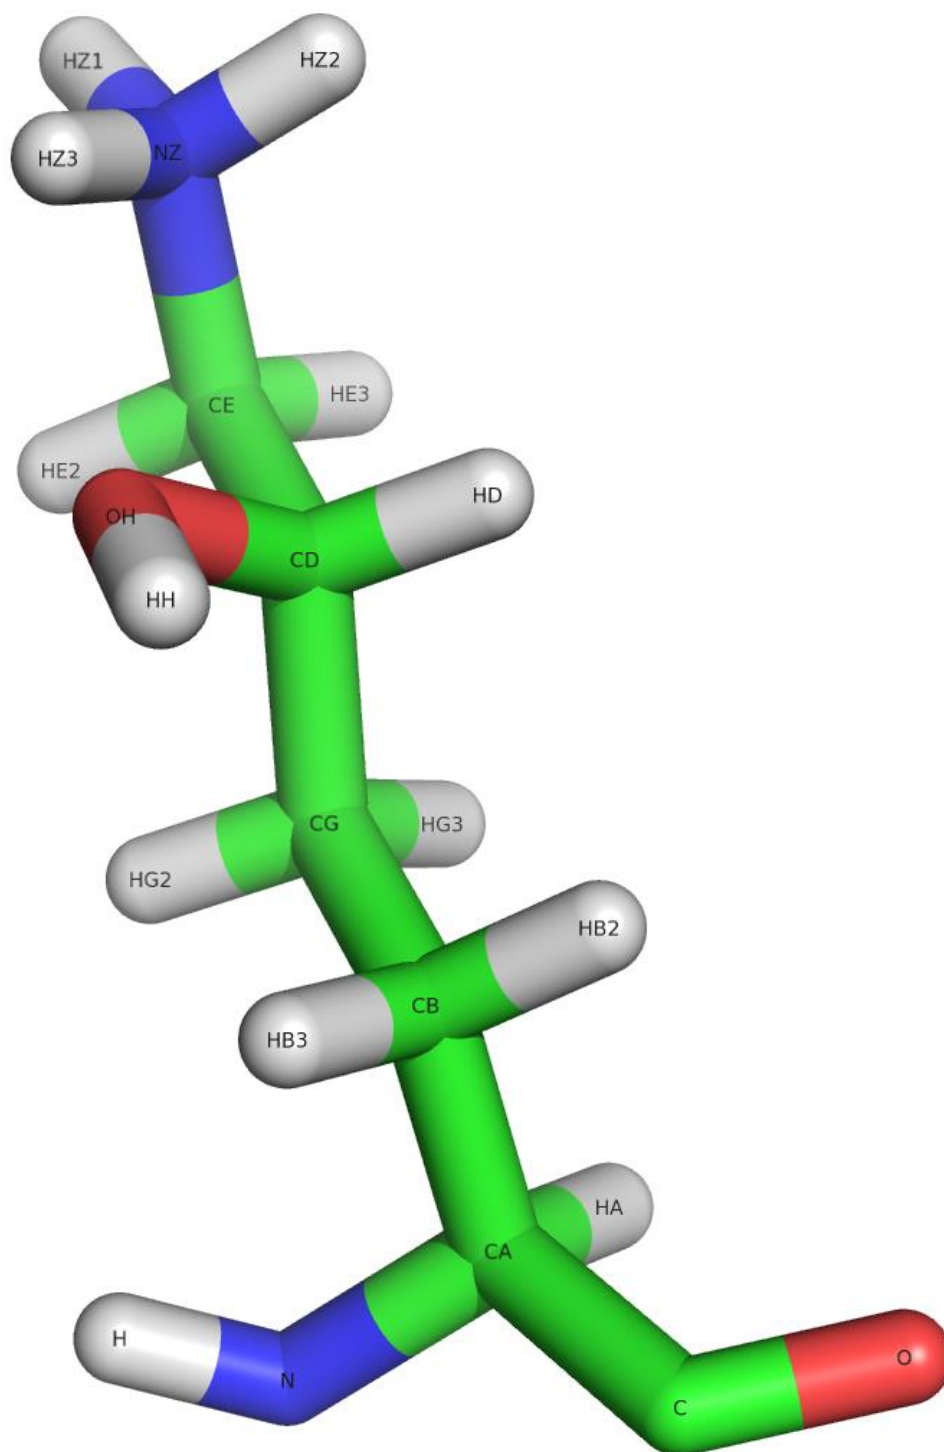

5-hydroxylysine (LYZ)  $\beta$ -conformer

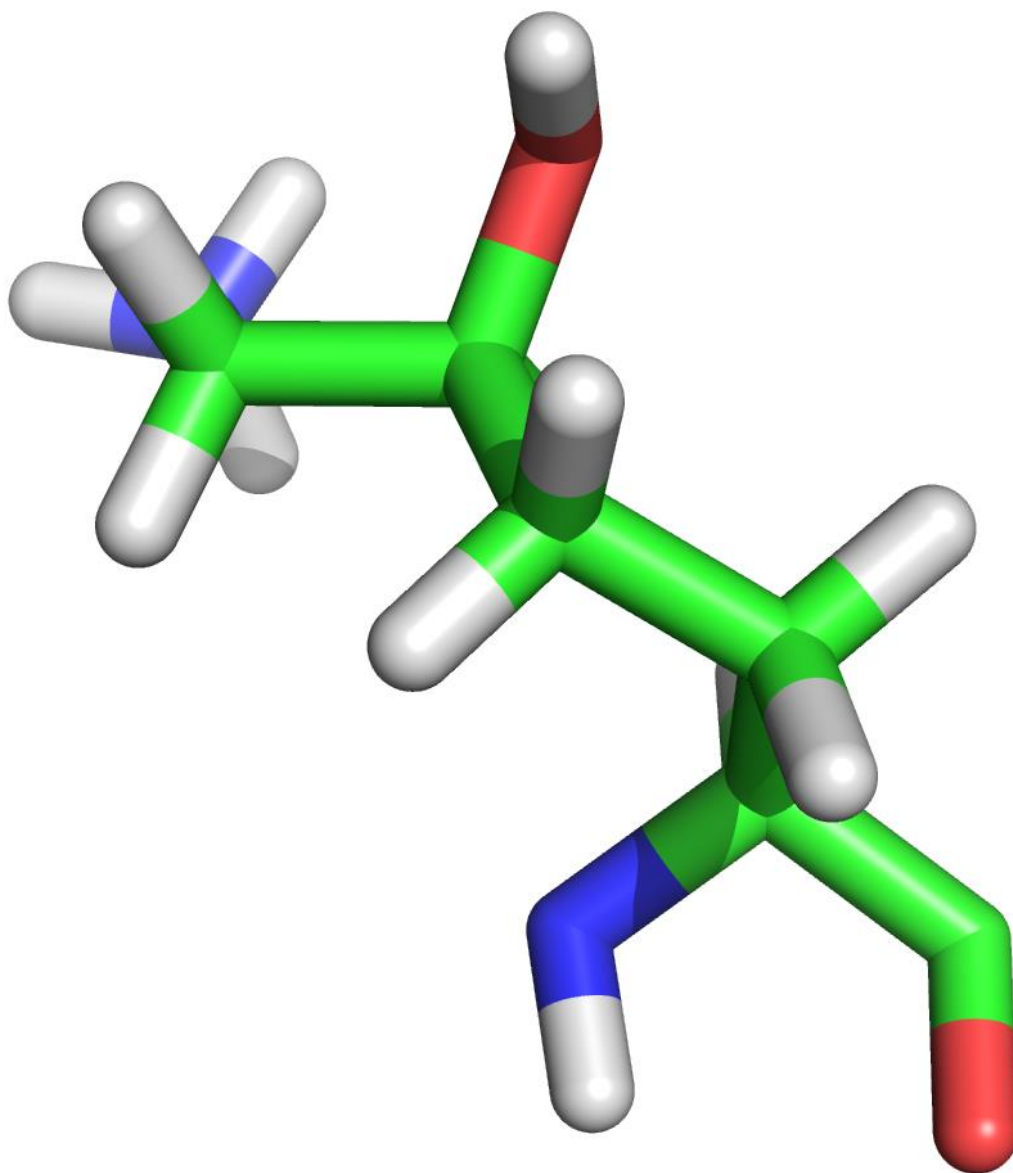

$\epsilon$ -N-methyllysine (MLZ)  $\alpha$ -conformer

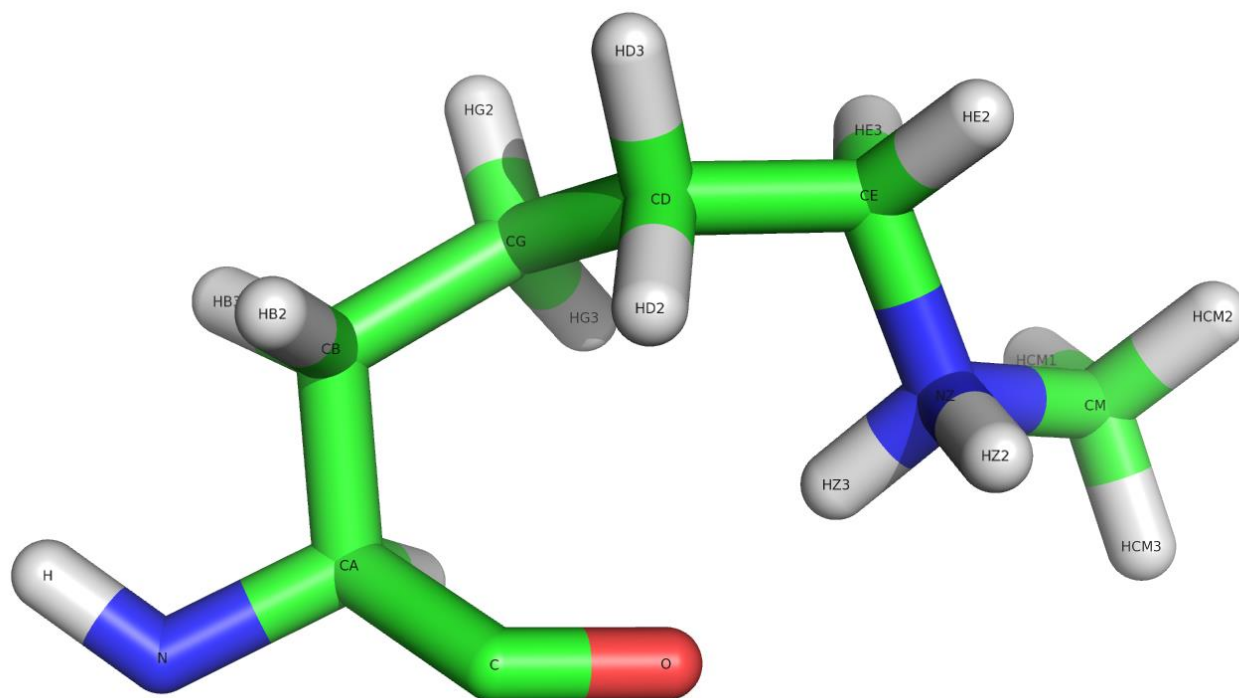

$\epsilon$ -N-methyllysine (MLZ)  $\beta$ -conformer

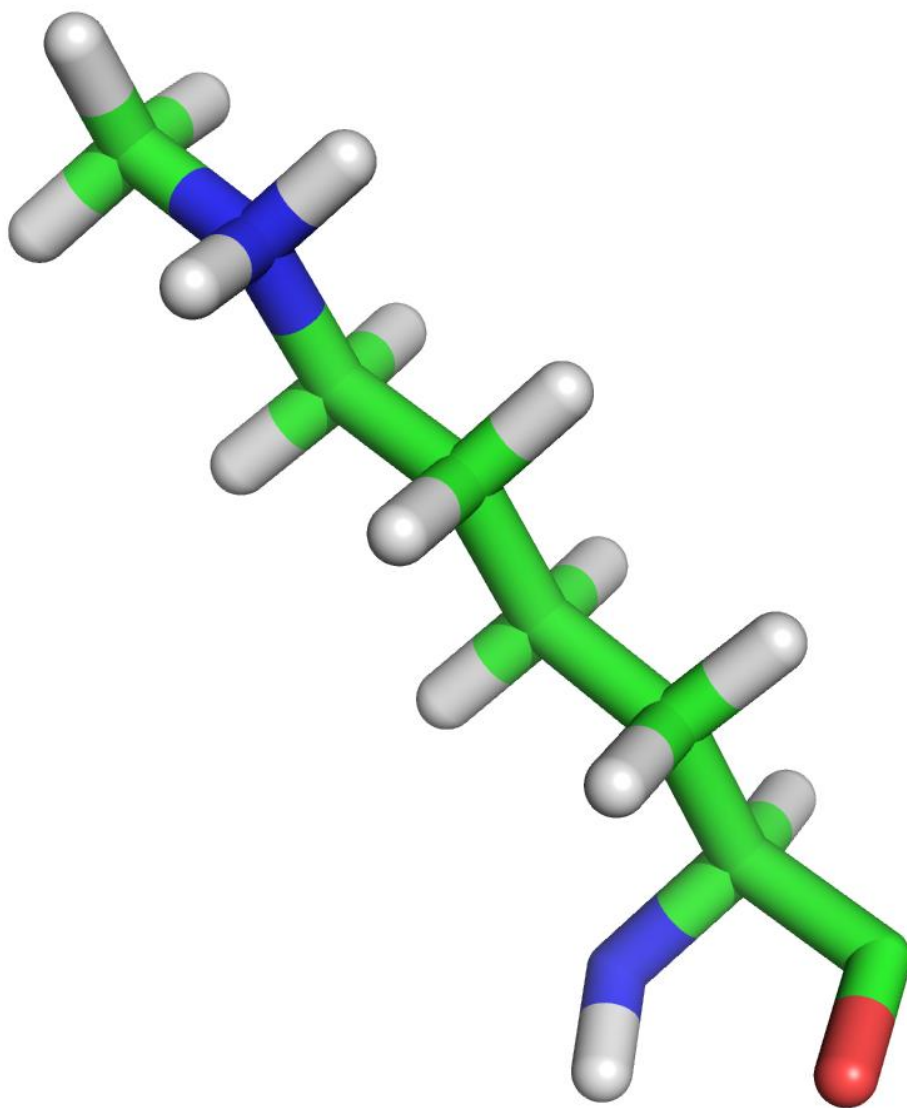

N- $\epsilon$ -acetyllysine (ALY)  $\alpha$ -conformer

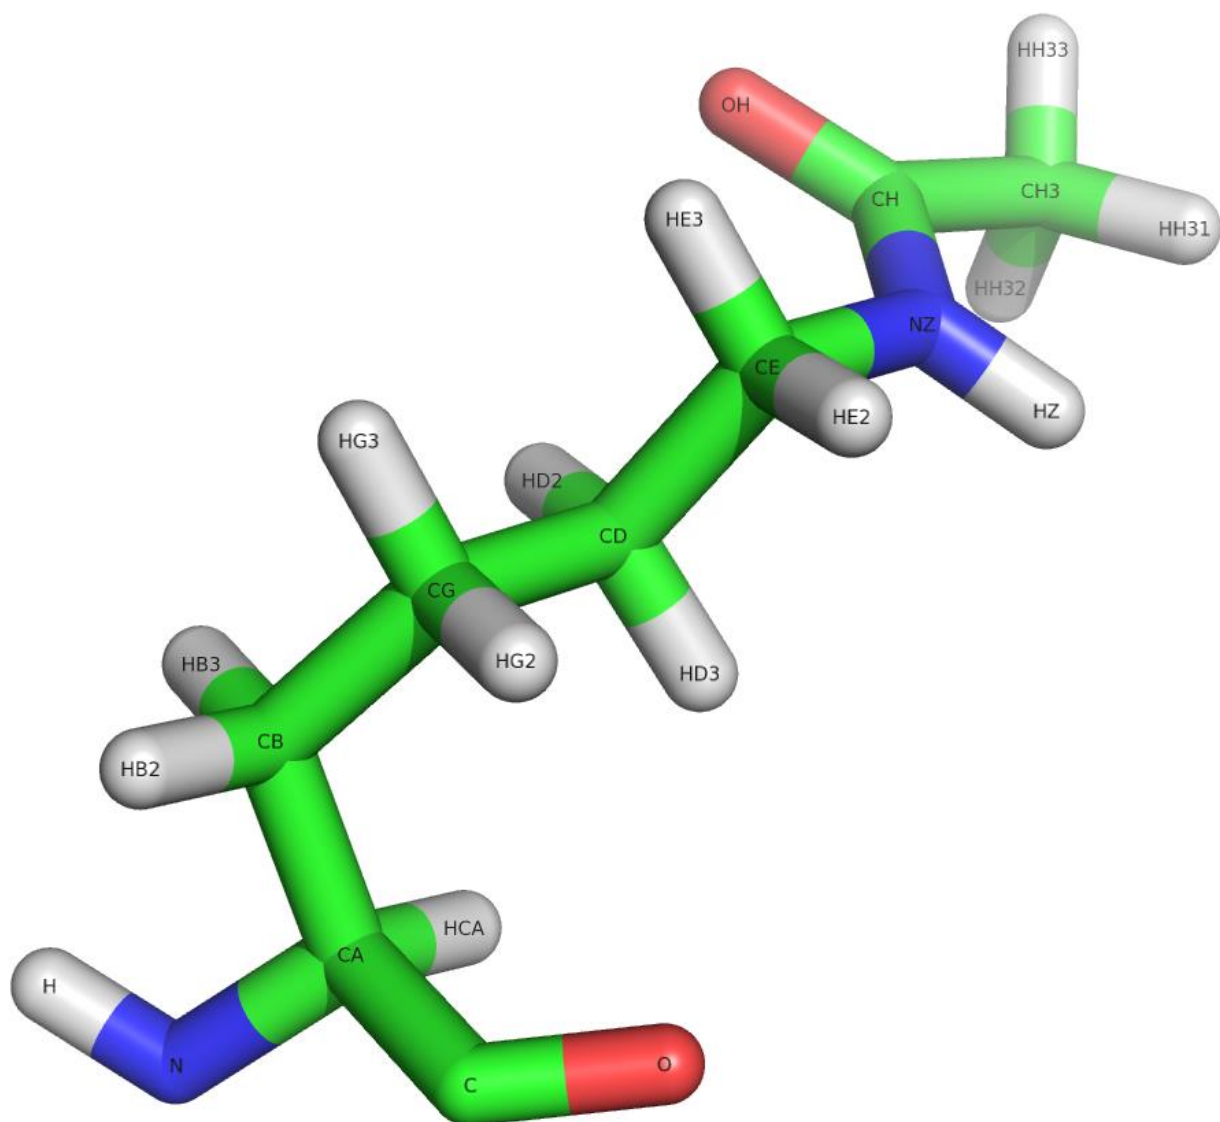

N- $\epsilon$ -acetyllysine (ALY)  $\beta$ -conformer

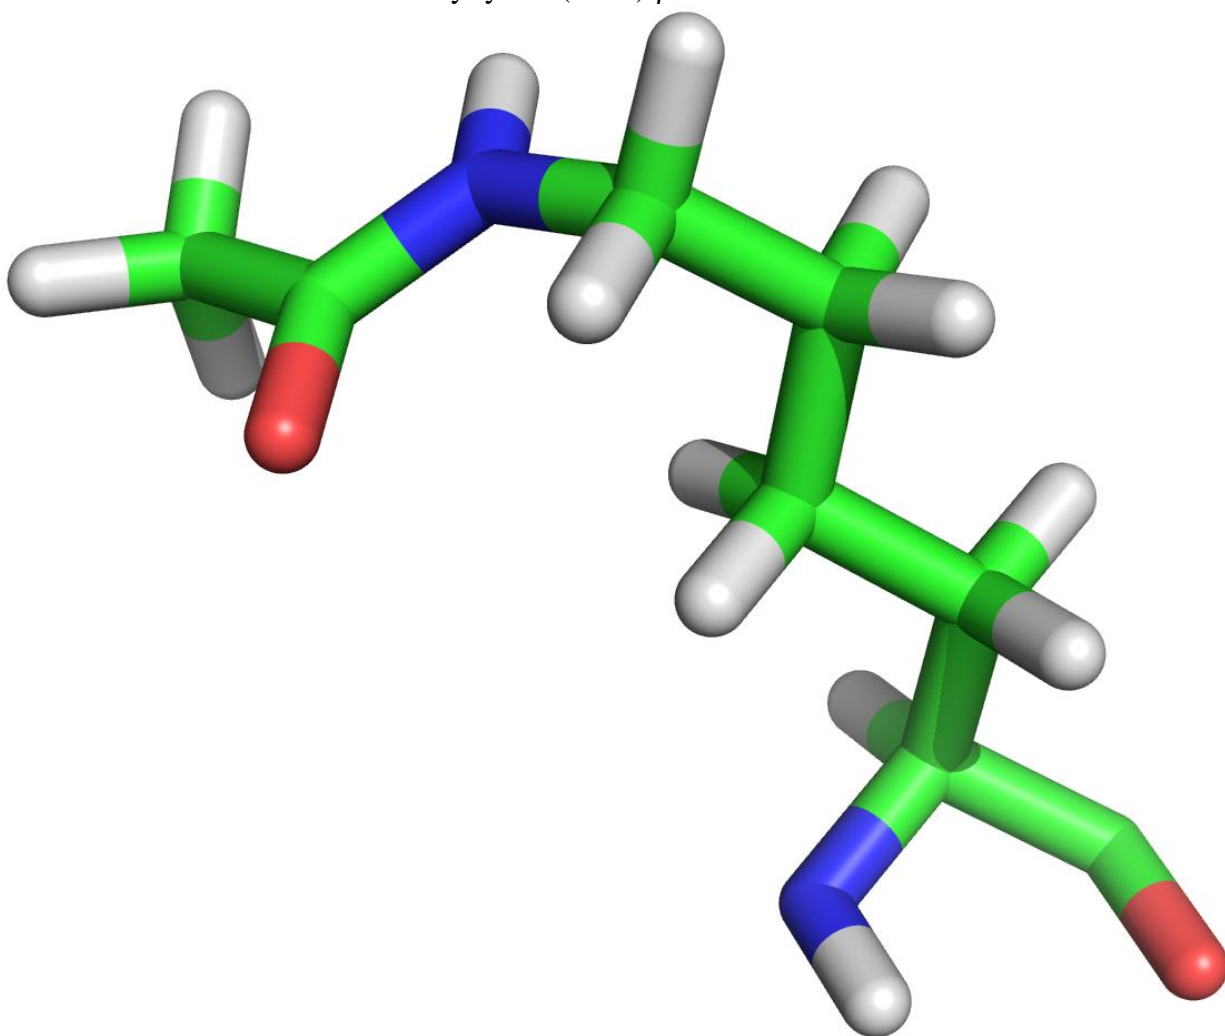



N6,N6-dimethyllysine (MLY)  $\alpha$ -conformer

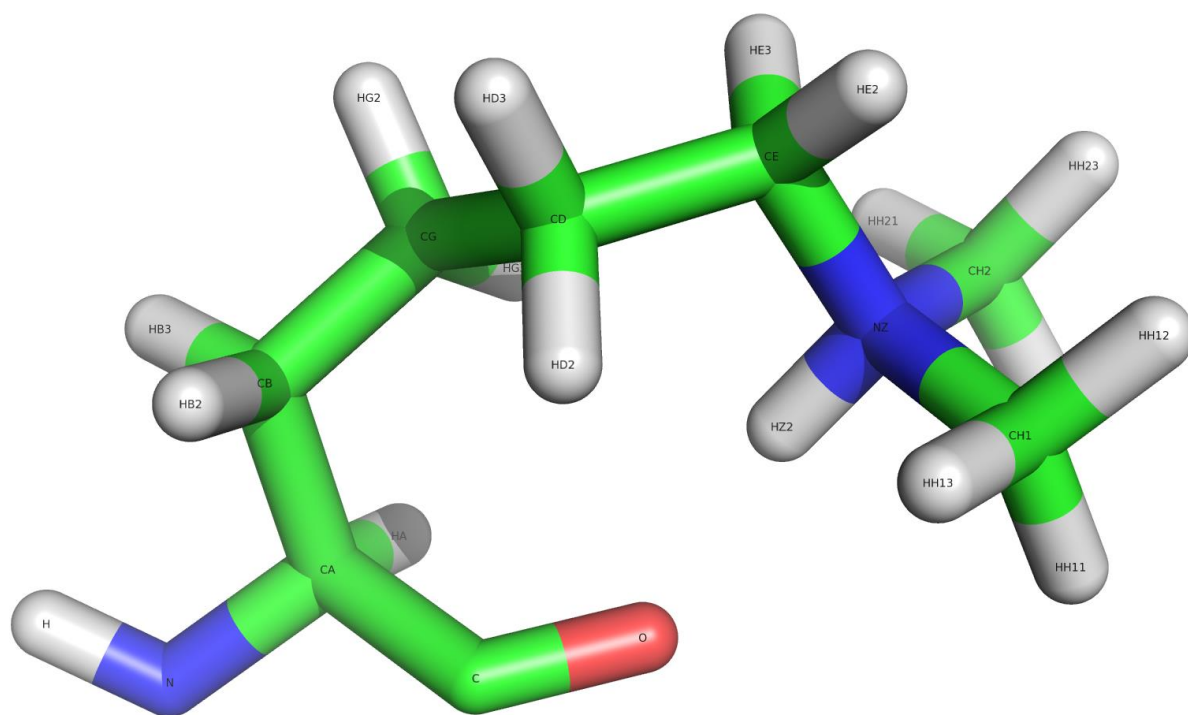

N6,N6-dimethyllysine (MLY)  $\beta$ -conformer

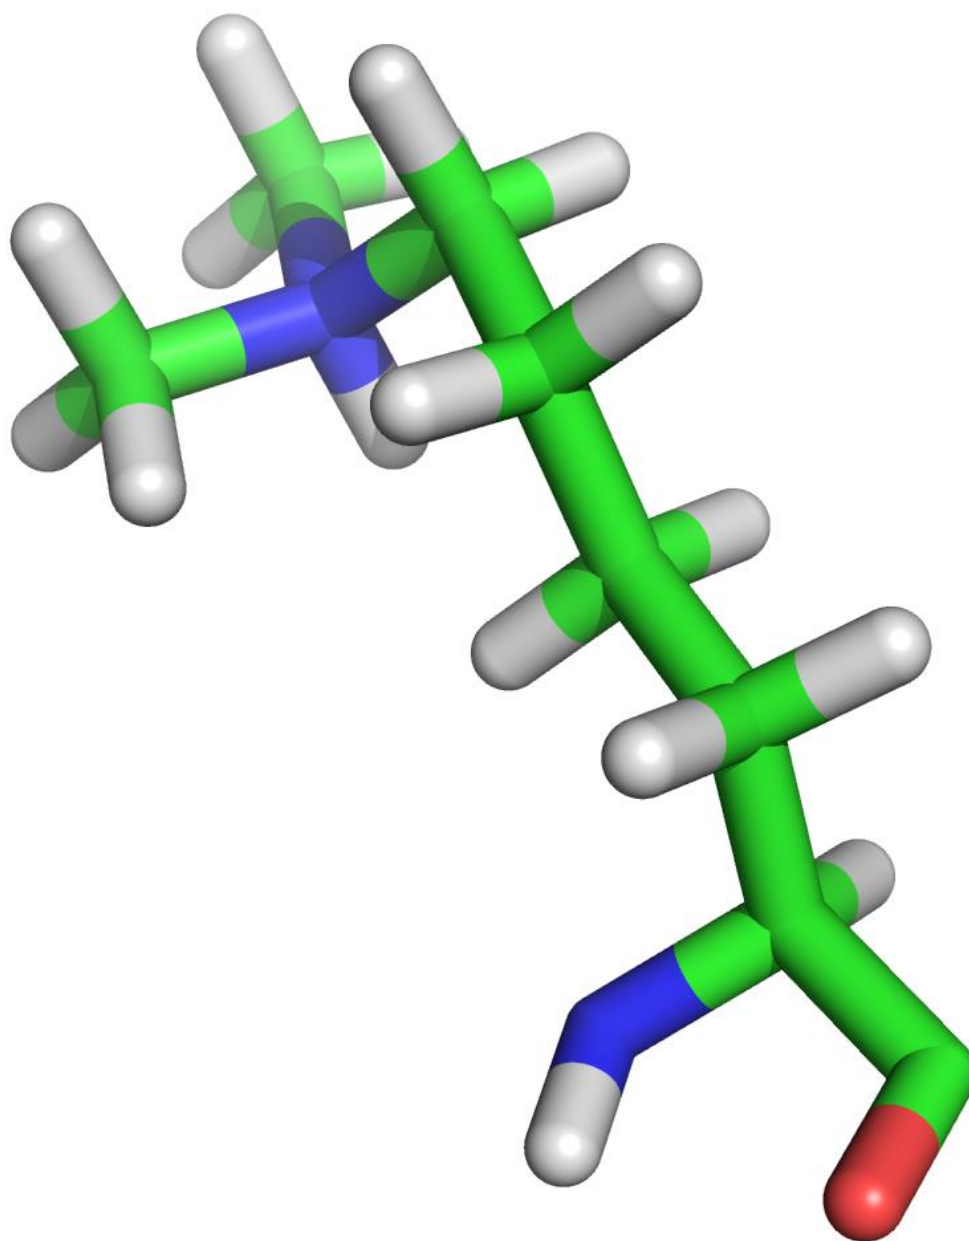

N6,N6,N6-trimethyllysine (M3L)  $\alpha$ -conformer

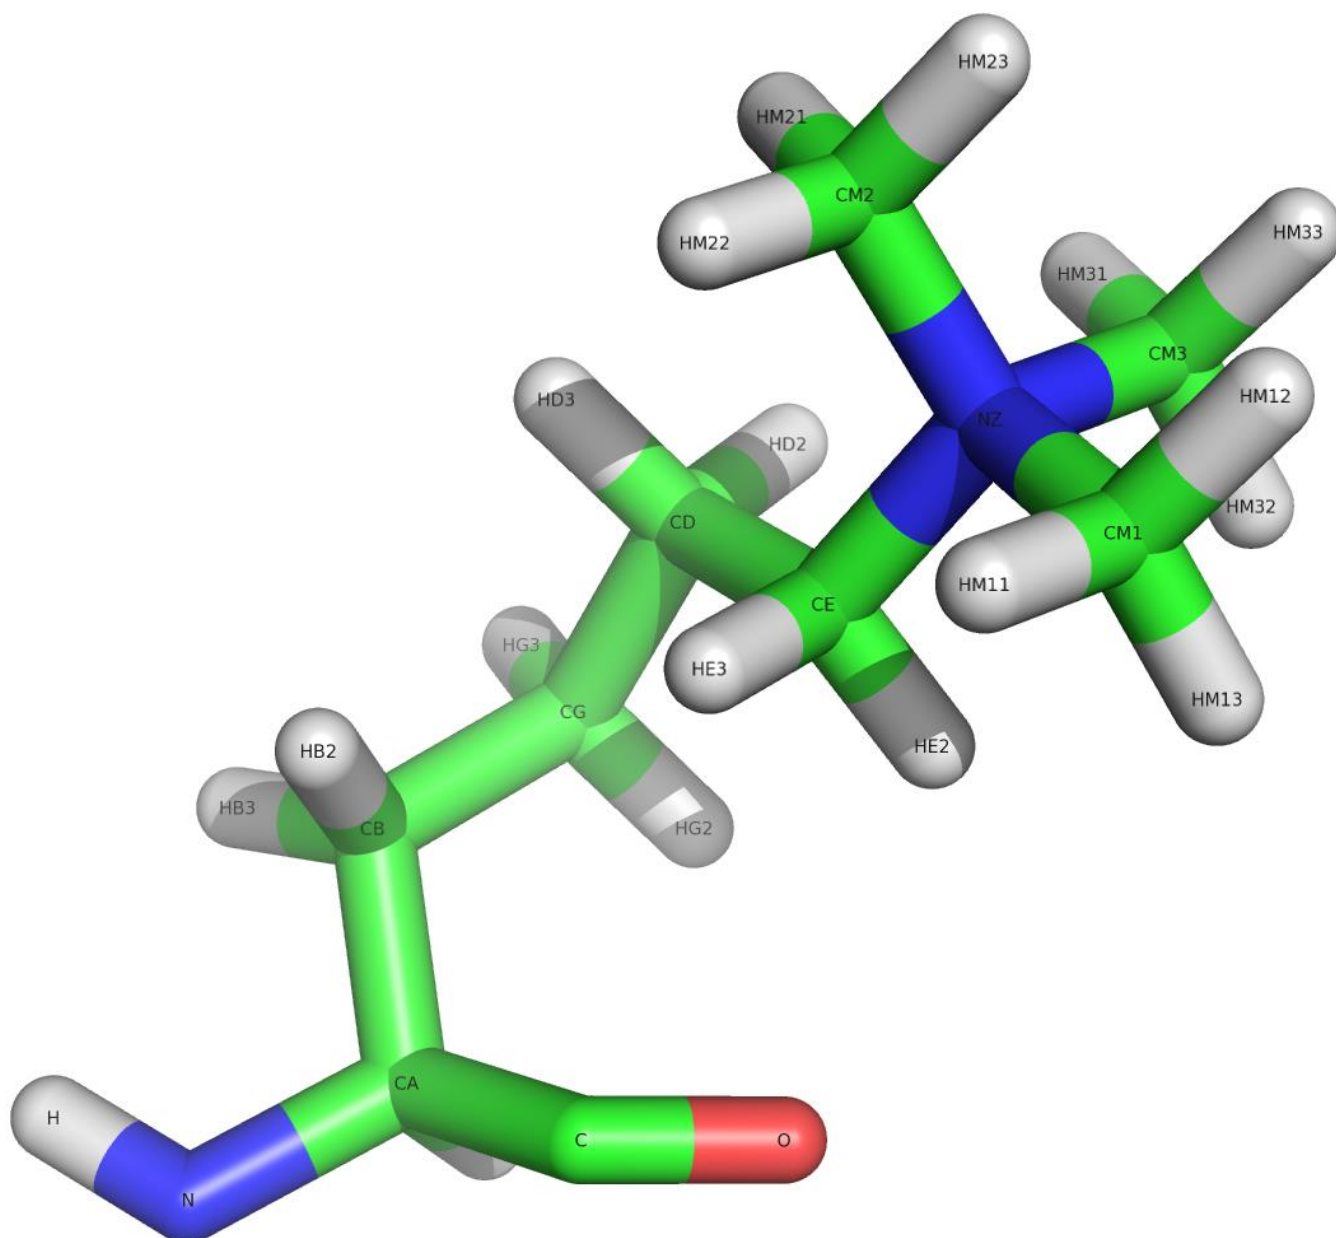

N6,N6,N6-trimethyllysine (M3L)  $\beta$ -conformer

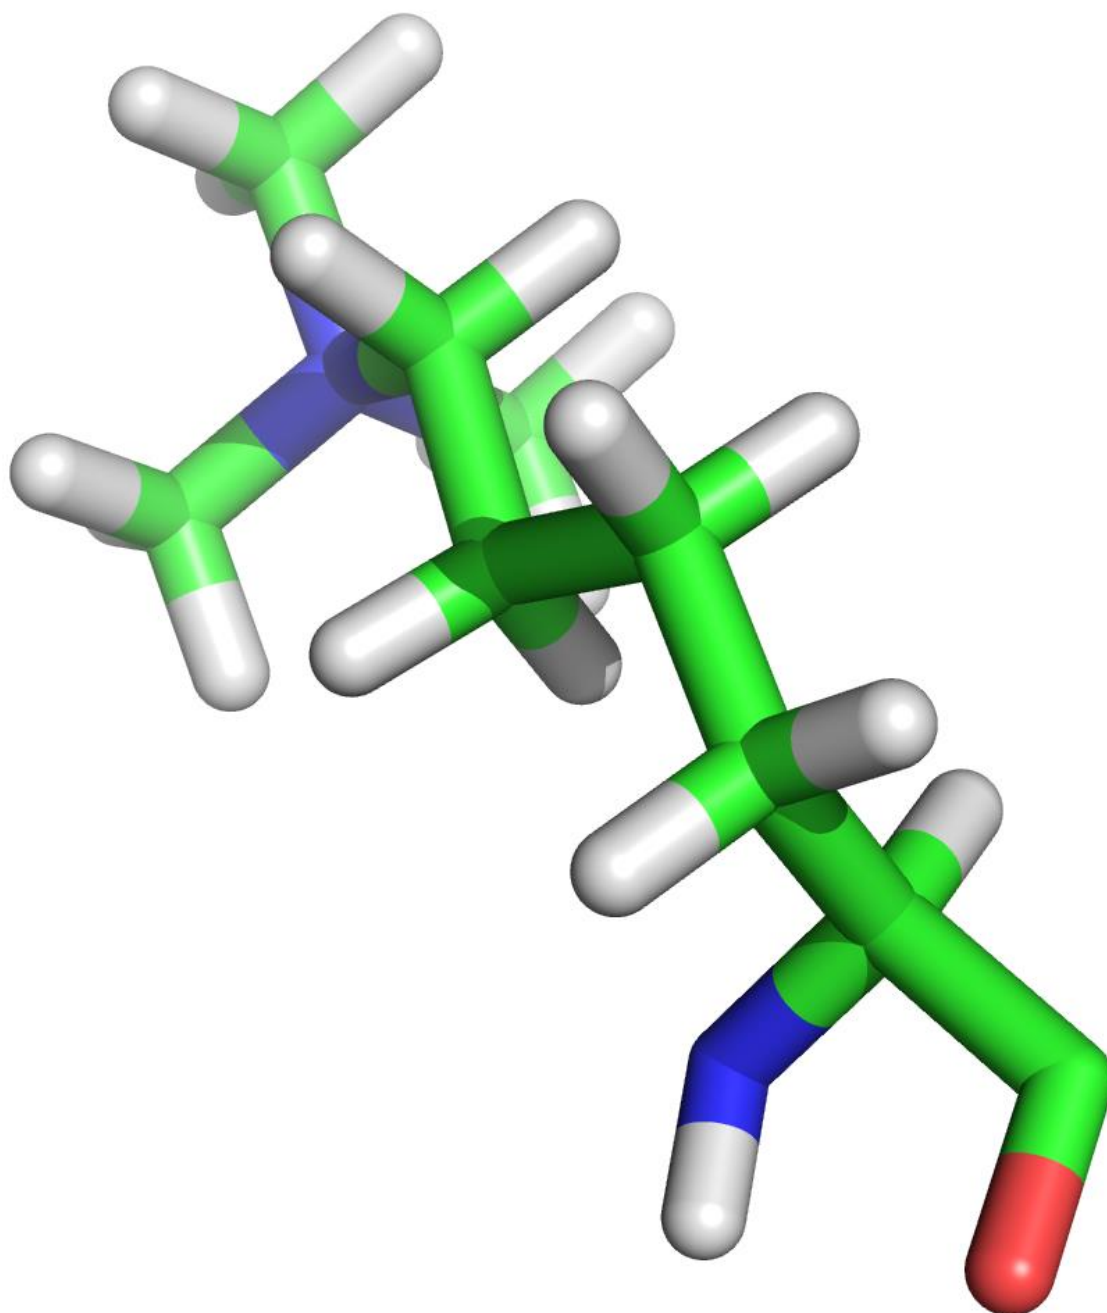

Pyrrolysine (PYH)  $\alpha$ -conformer

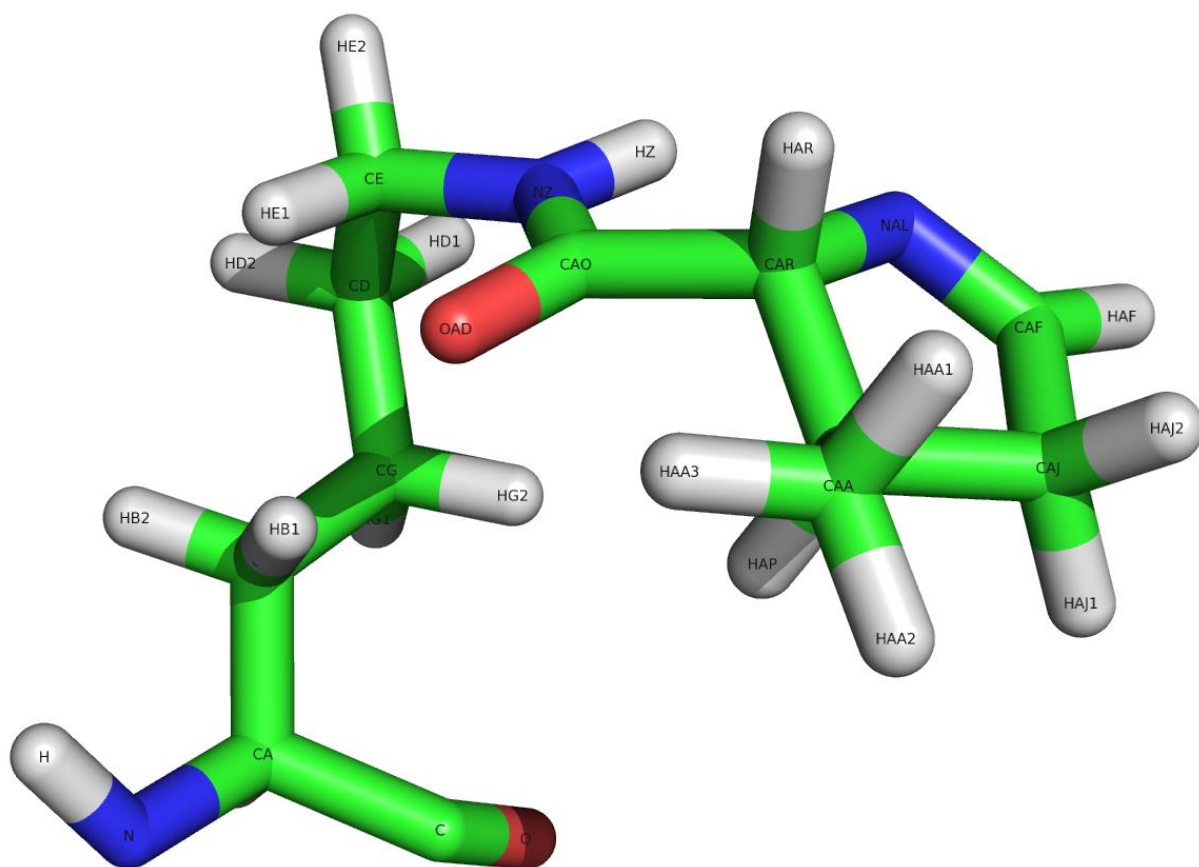

Pyrrolysine (PYH)  $\beta$ -conformer

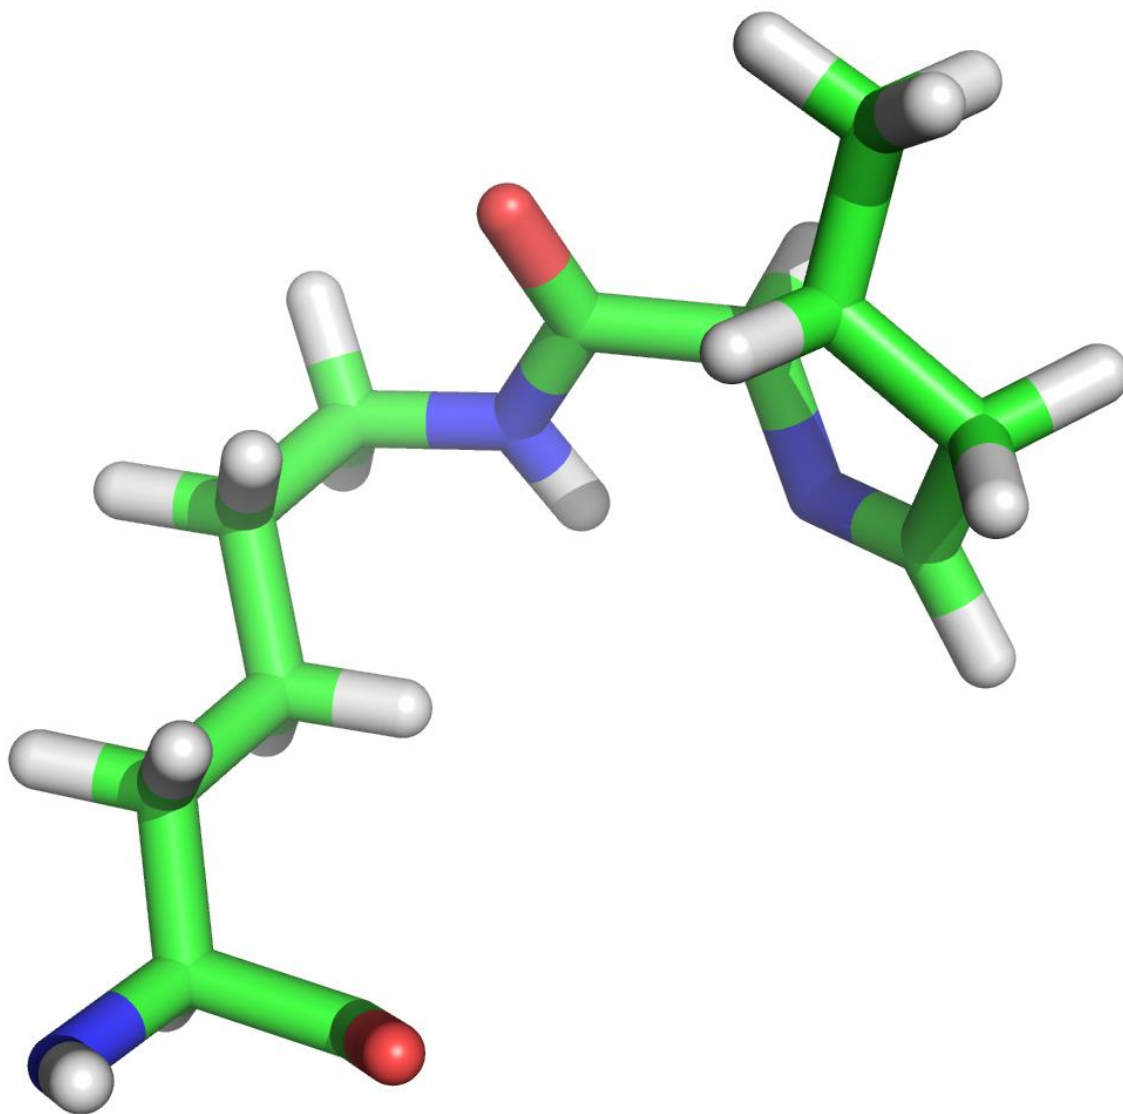

Ornithine (ORN)  $\alpha$ -conformer

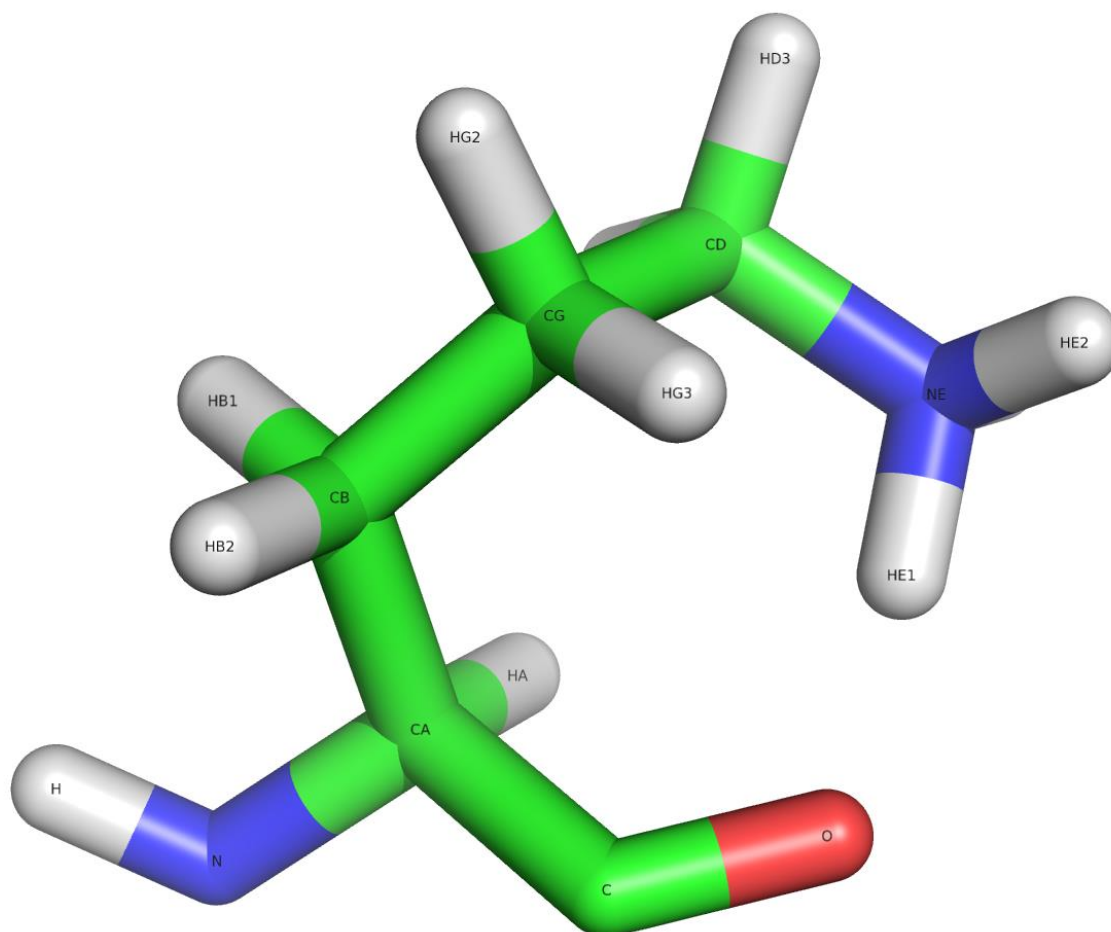

Ornithine (ORN)  $\beta$ -conformer

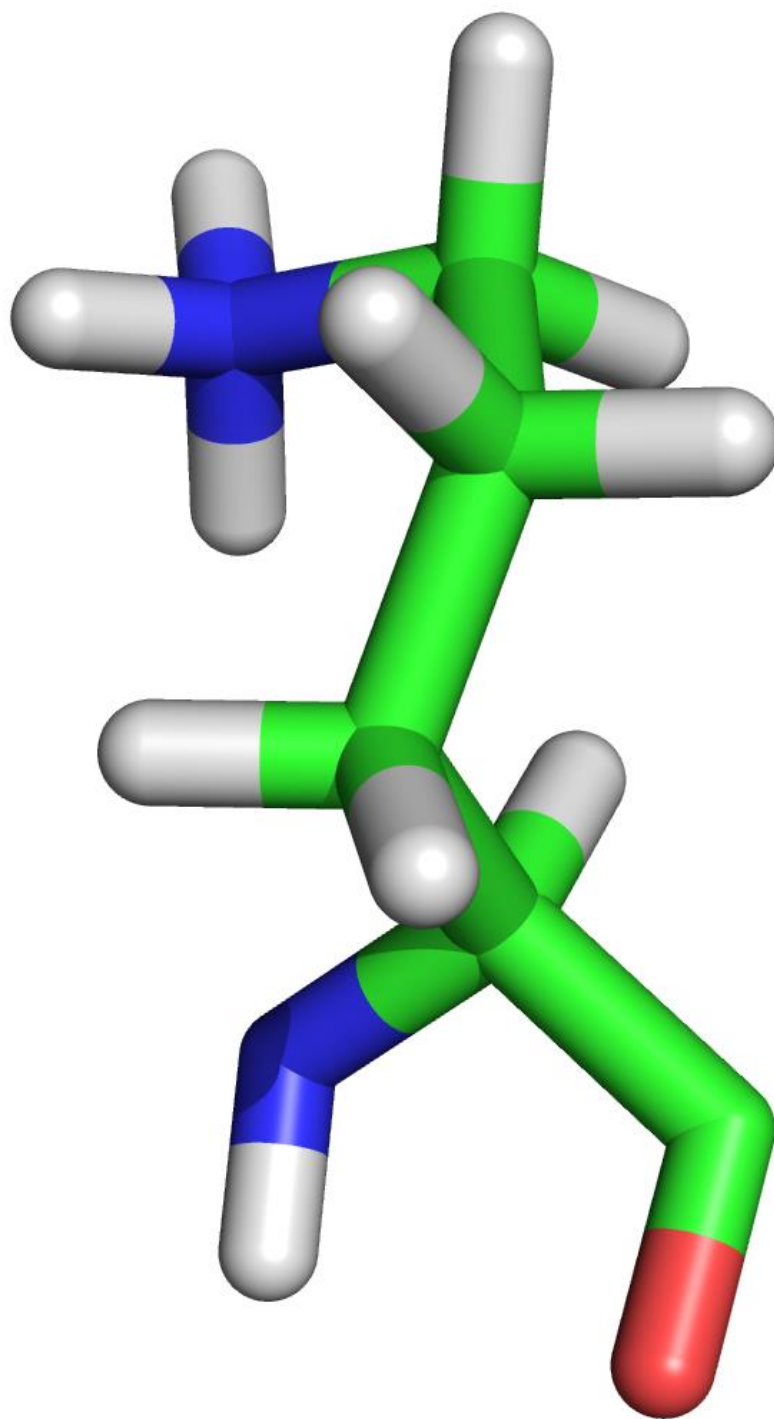



N6-propanoyllysine (PRK)  $\alpha$ -conformer

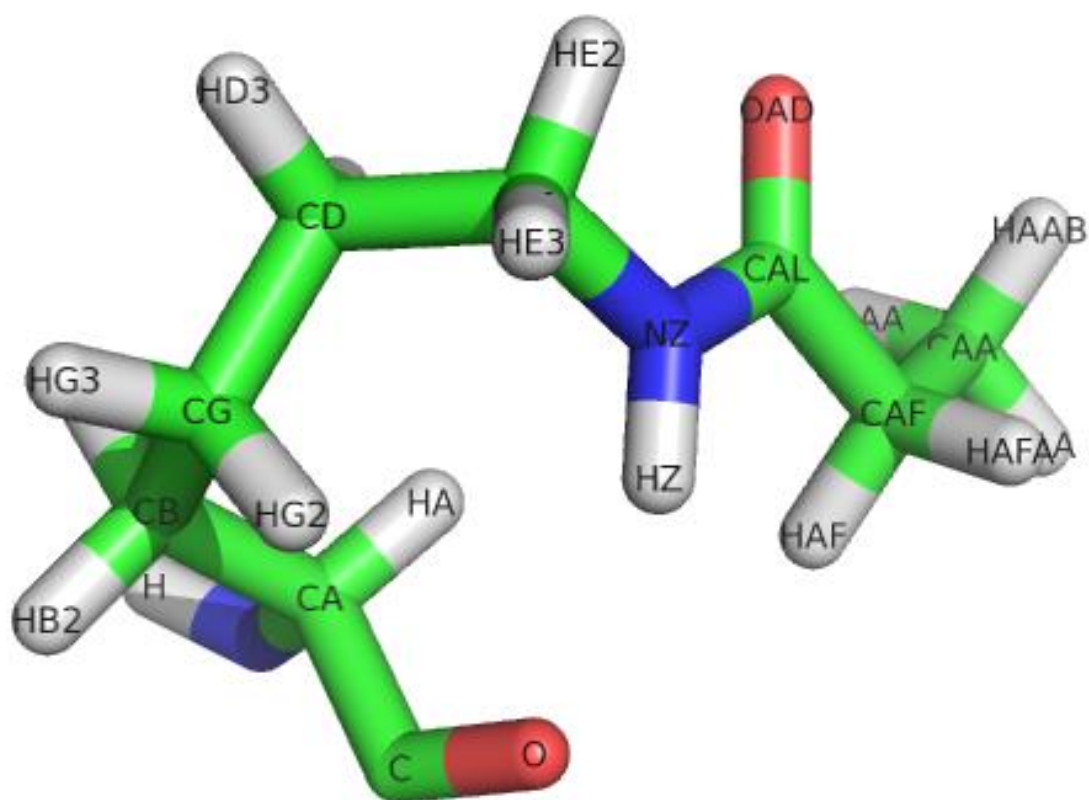

N6-propanoyllysine (PRK)  $\beta$ -conformer

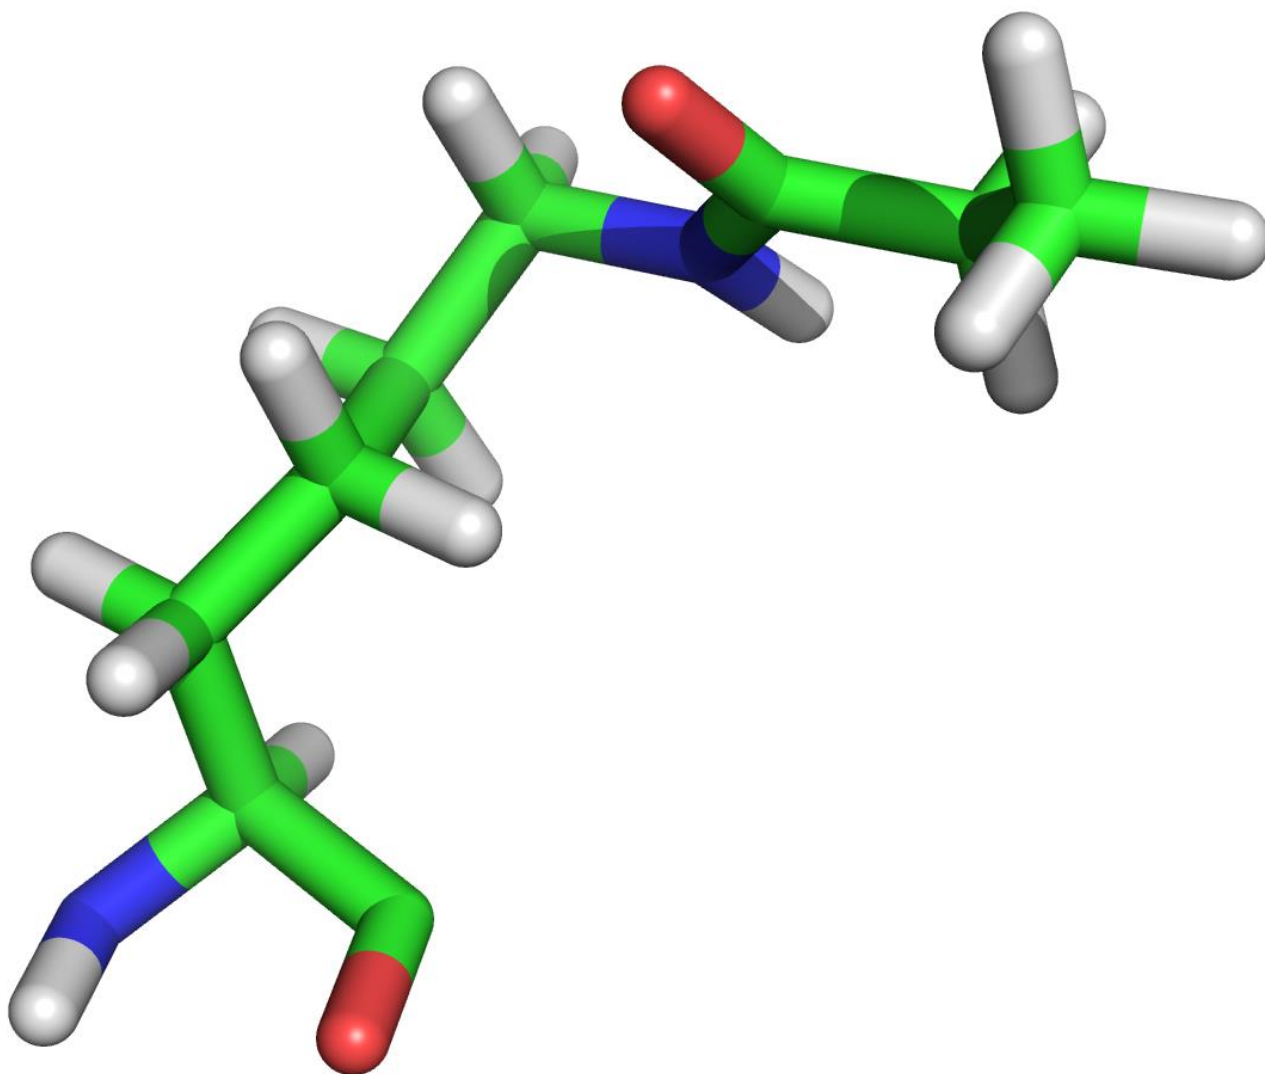

N6-butanoyllysine (BTK)  $\alpha$ -conformer

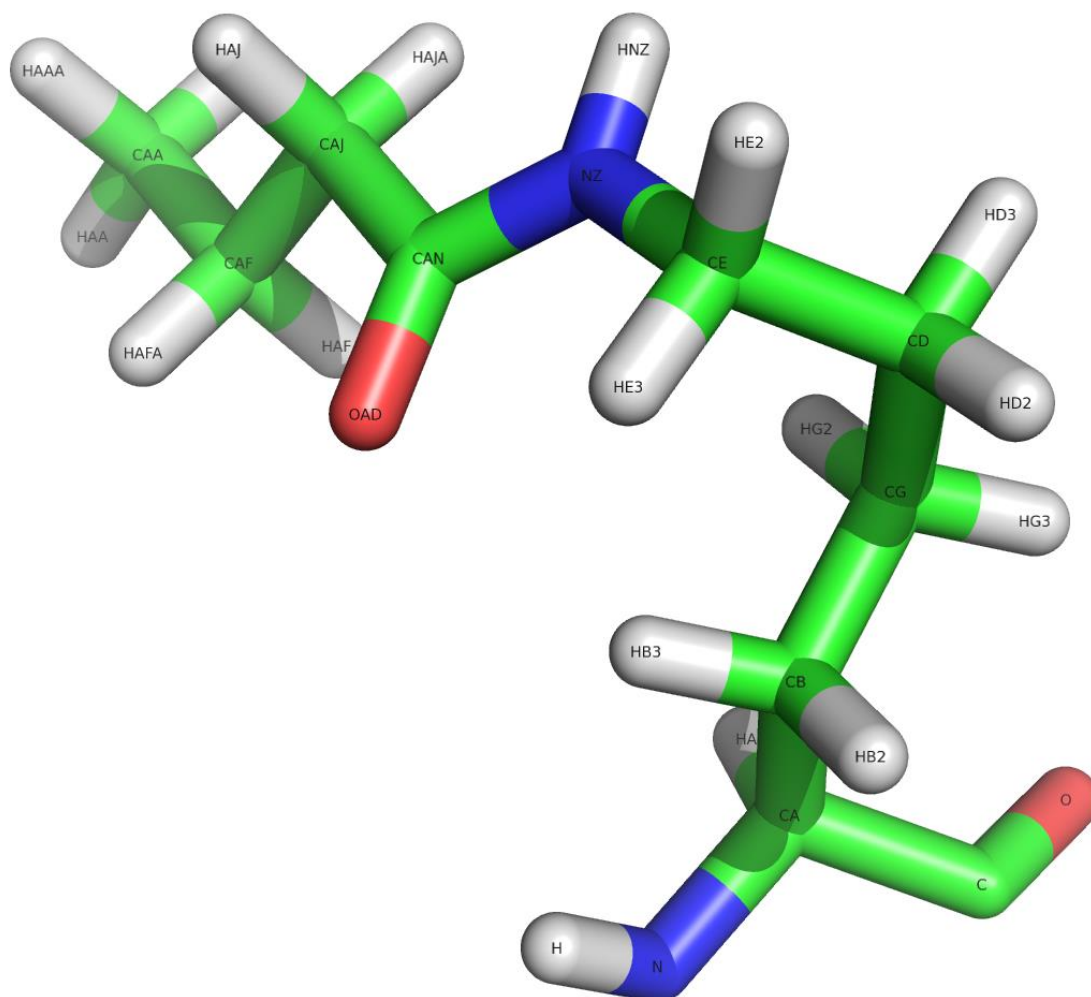

N6-butanoyllysine (BTK)  $\beta$ -conformer

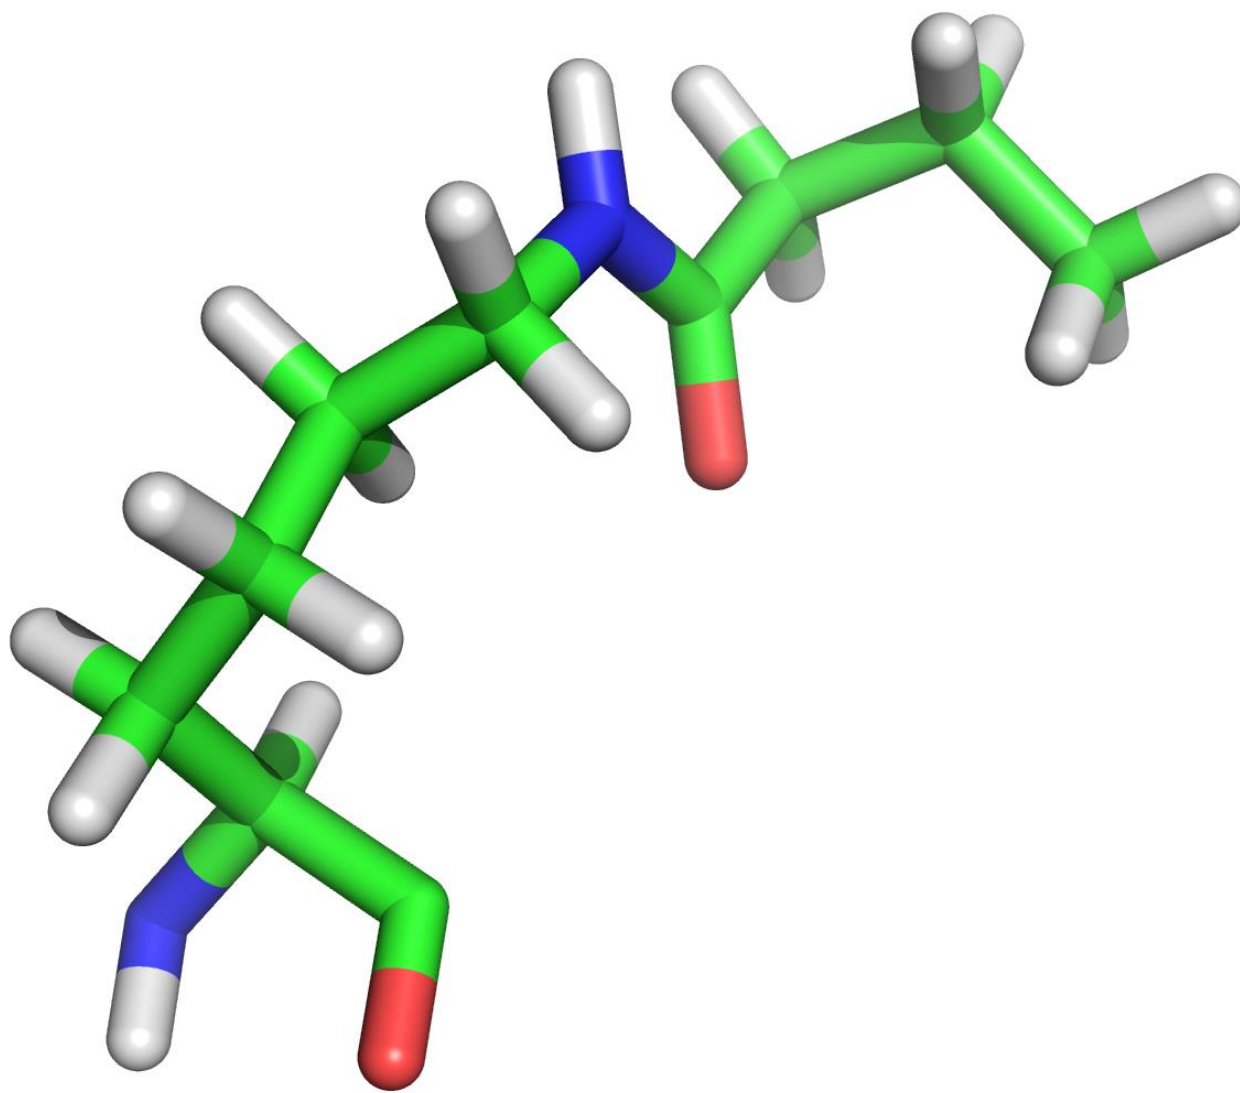

Proline Modifications  
3,4-dihydroxyproline (DHP)  $\alpha$ -conformer

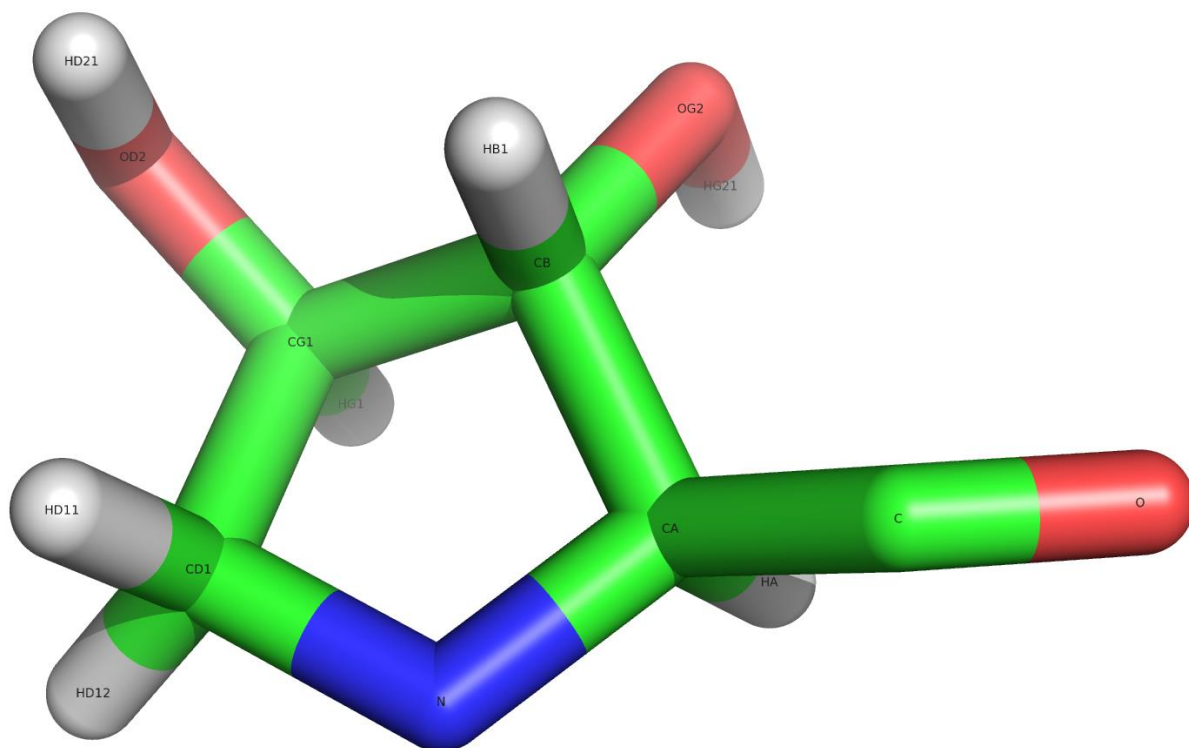

3,4-dihydroxyproline (DHP)  $\beta$ -conformer

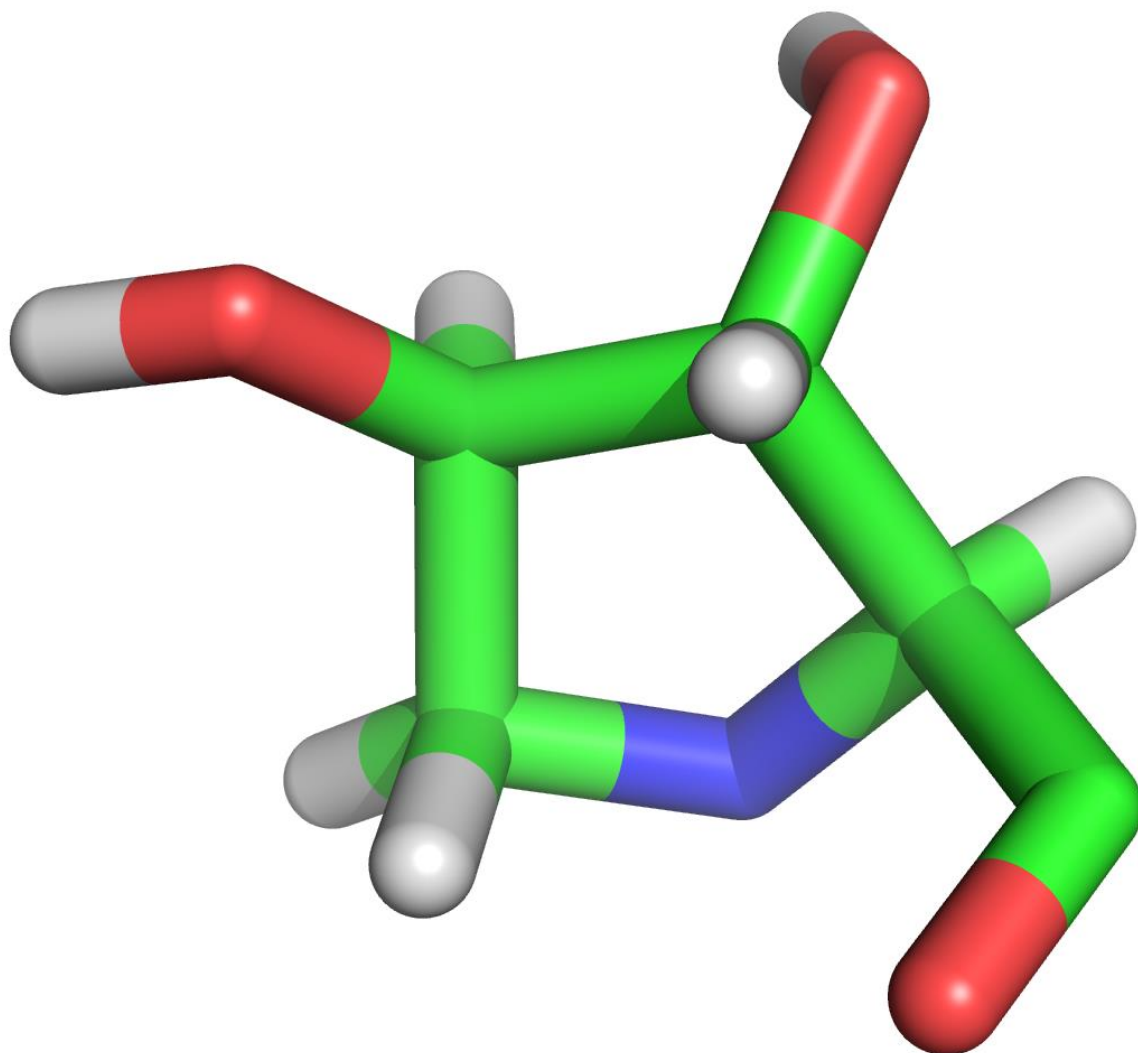

3-hydroxyproline (HY3)  $\alpha$ -conformer

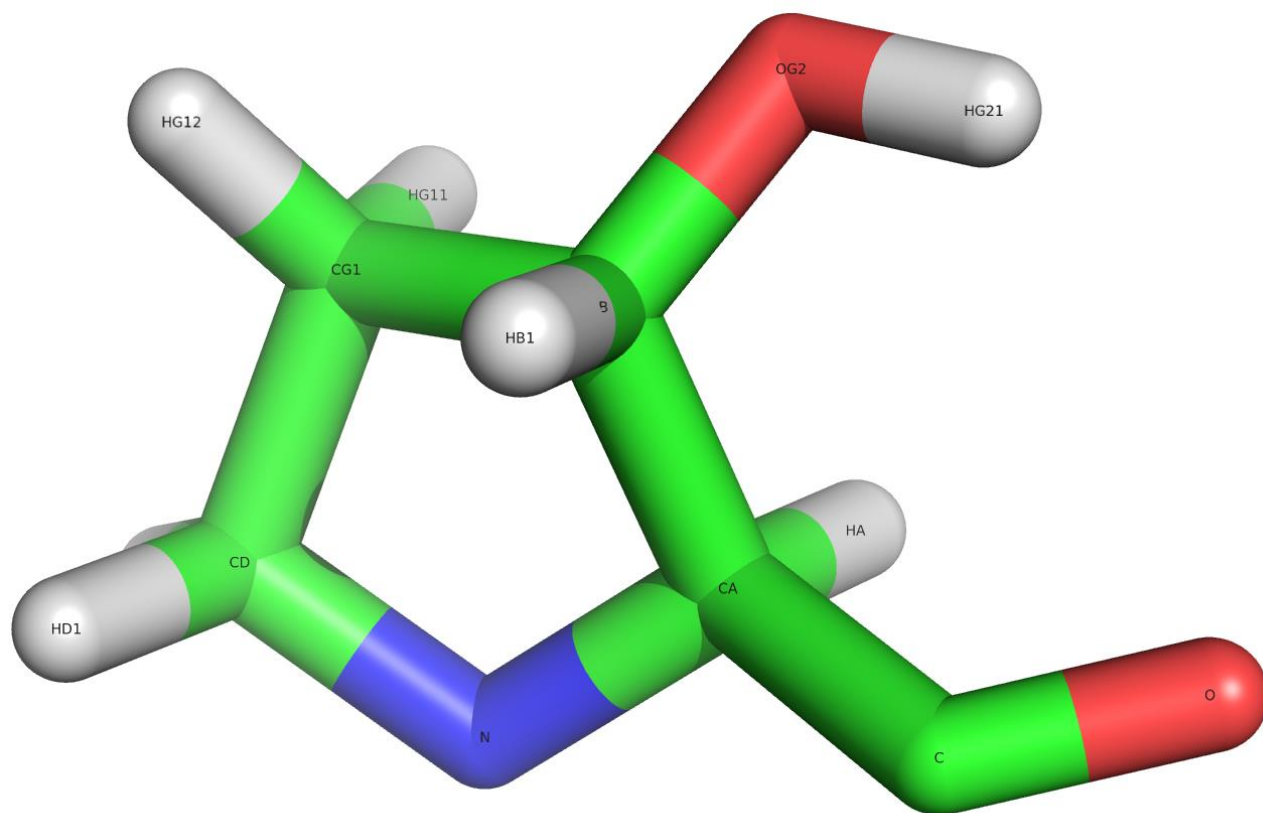

3-hydroxyproline (HY3)  $\beta$ -conformer

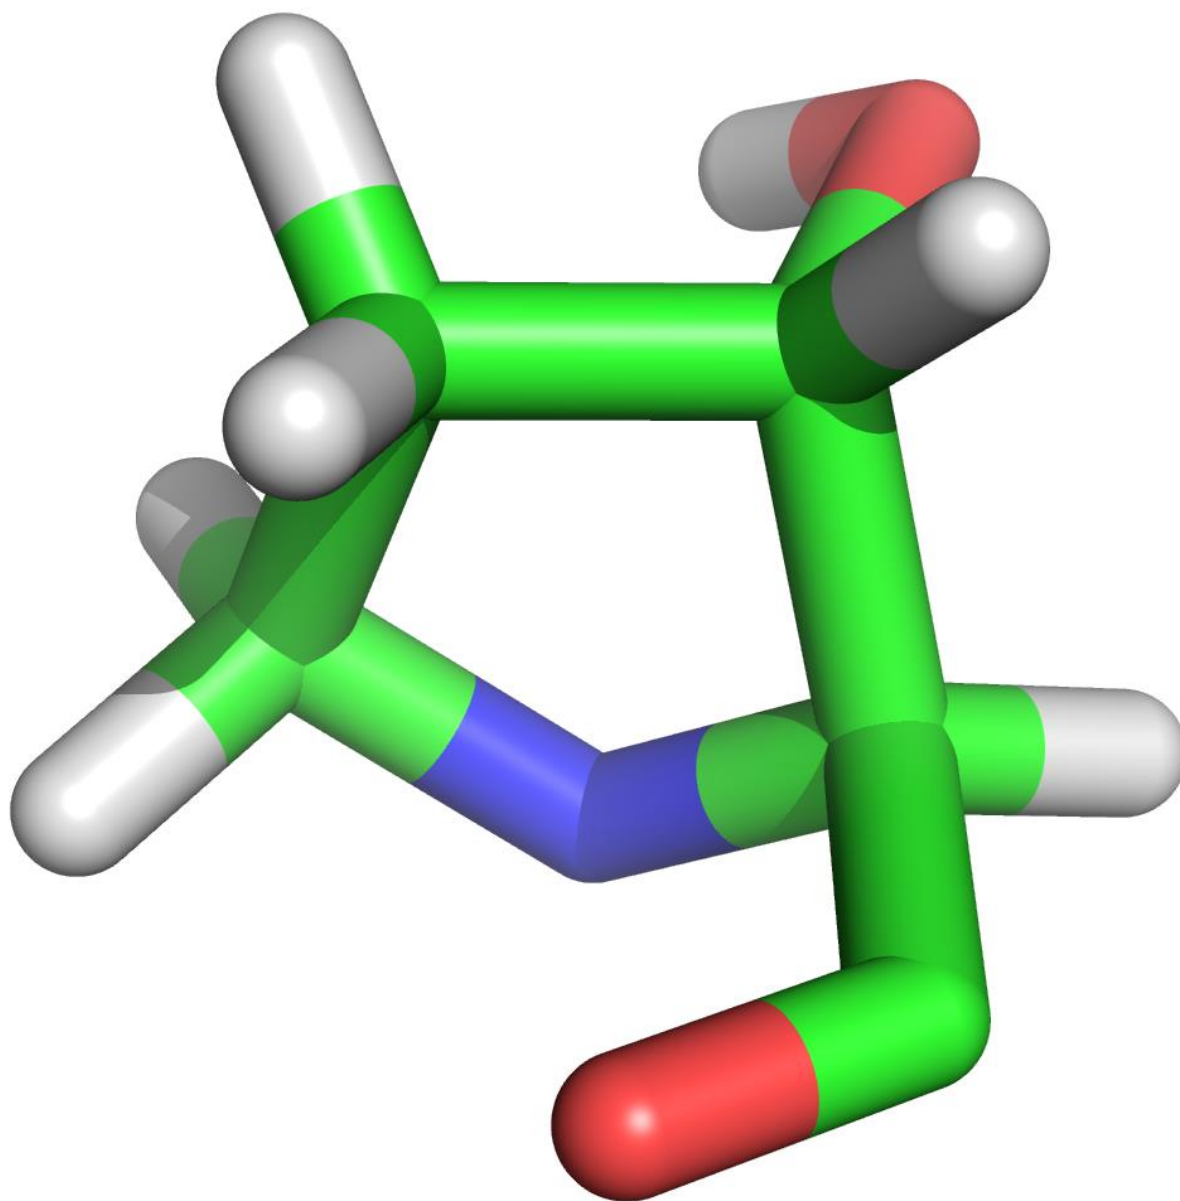



4-hydroxyproline (HYP)  $\alpha$ -conformer

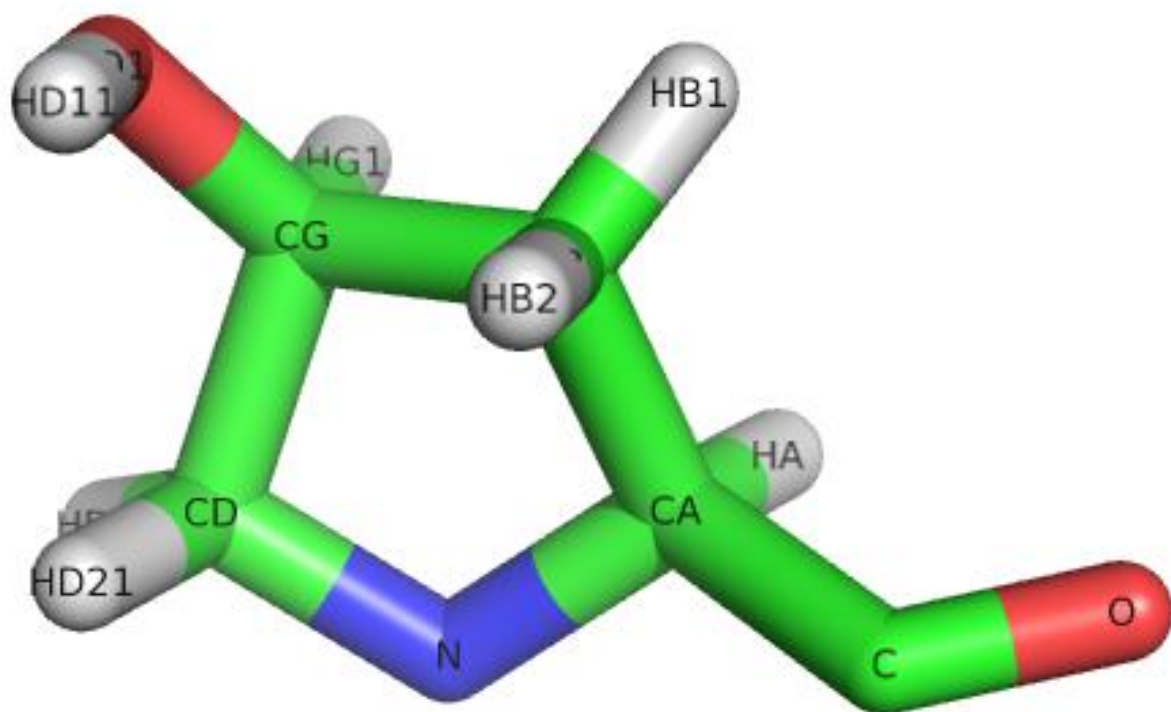

4-hydroxyproline (HYP)  $\beta$ -conformer

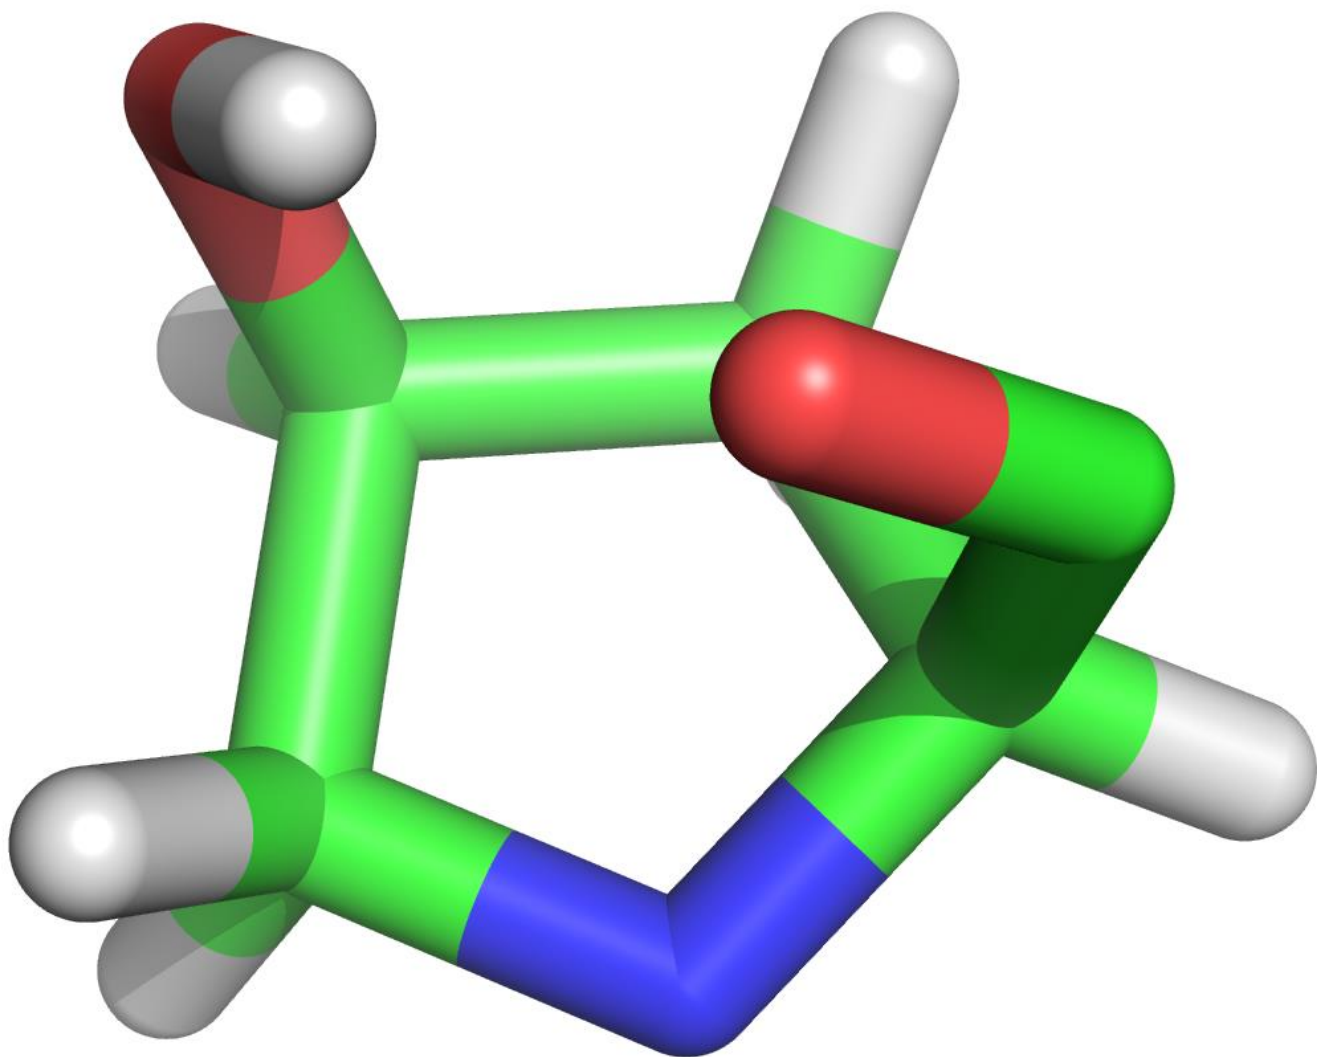

Arginine Modifications  
Dimethylarginine (Anti-symmetric) (DA2)  $\alpha$ -conformer

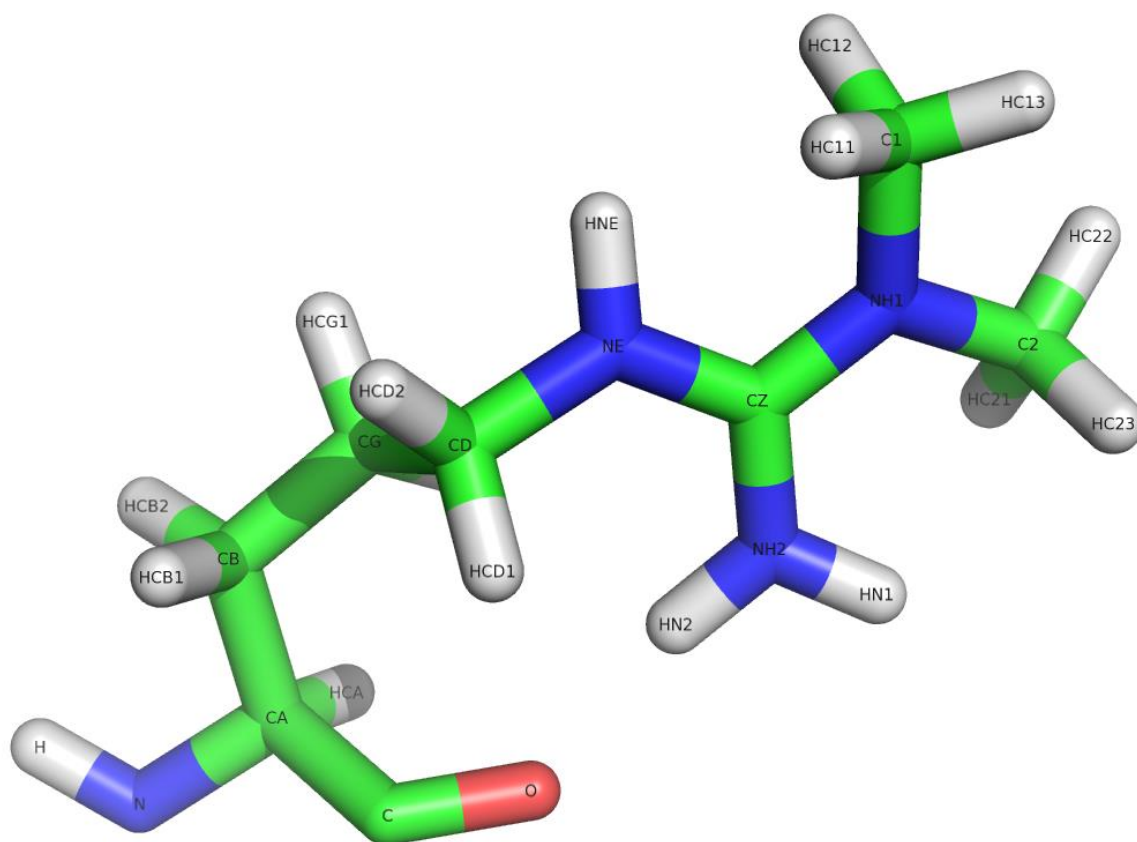

Dimethylarginine (Anti-symmetric) (DA2)  $\beta$ -conformer

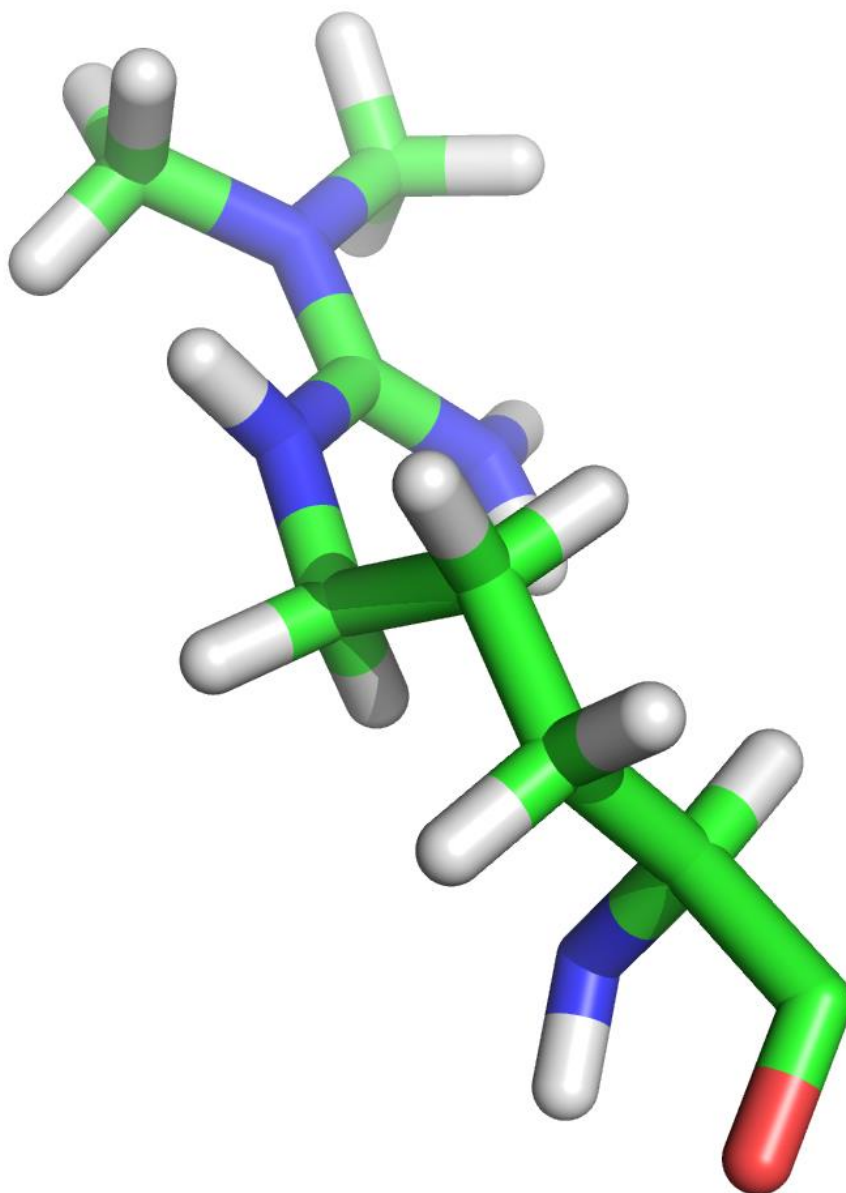

$\omega$ -methylarginine (DA1)  $\alpha$ -conformer

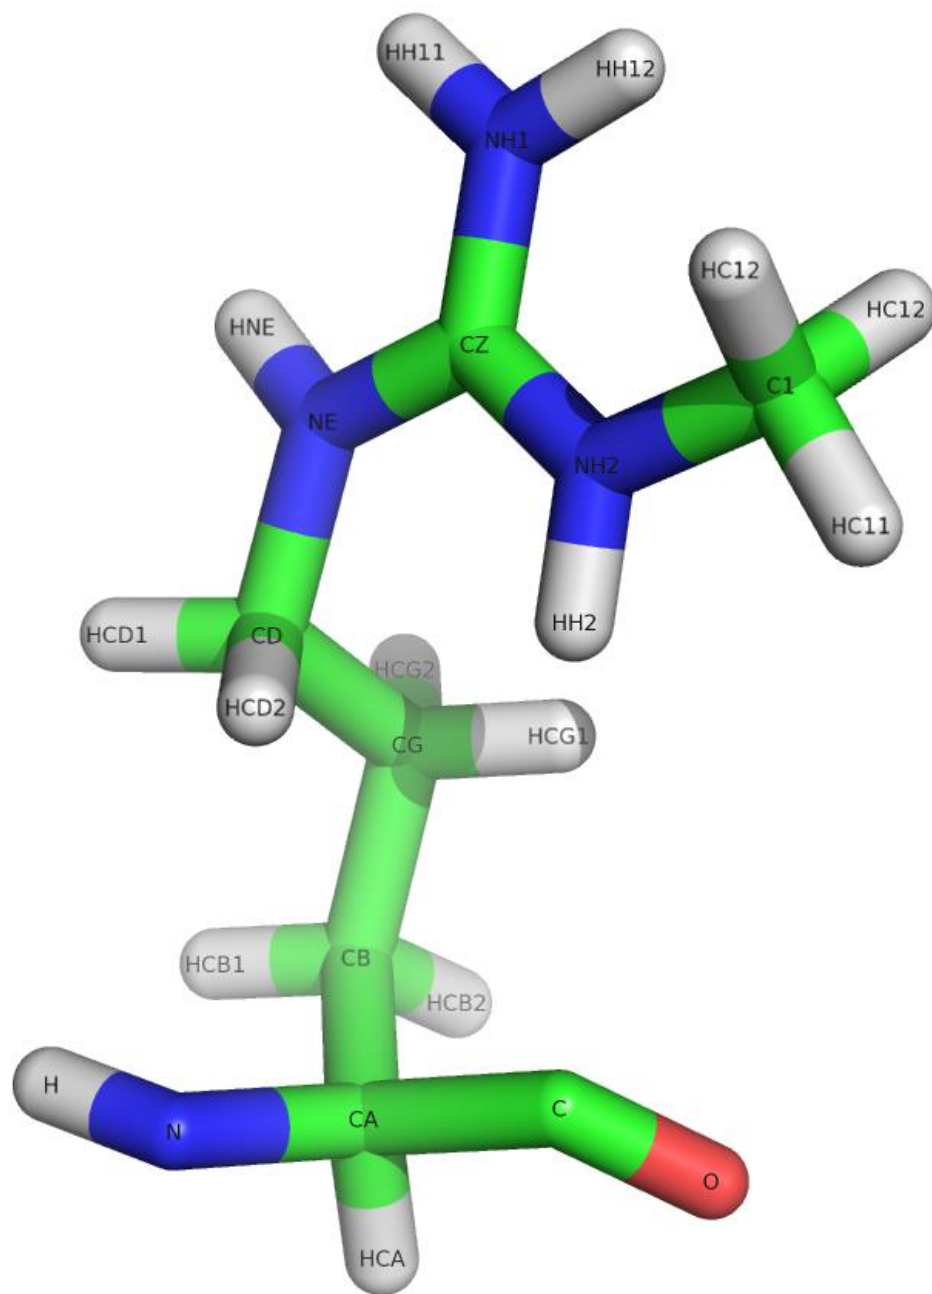

$\omega$ -methylarginine (DA1)  $\beta$ -conformer

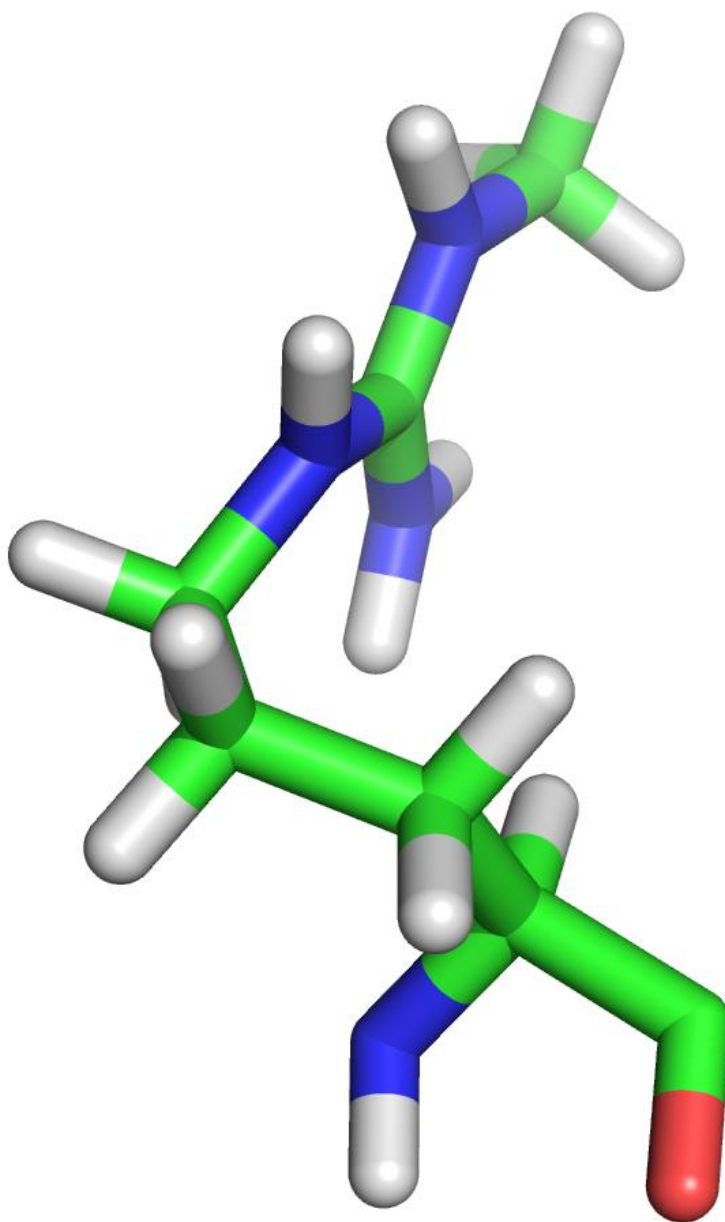

Dimethylarginine (Symmetric) (2MR)  $\alpha$ -conformer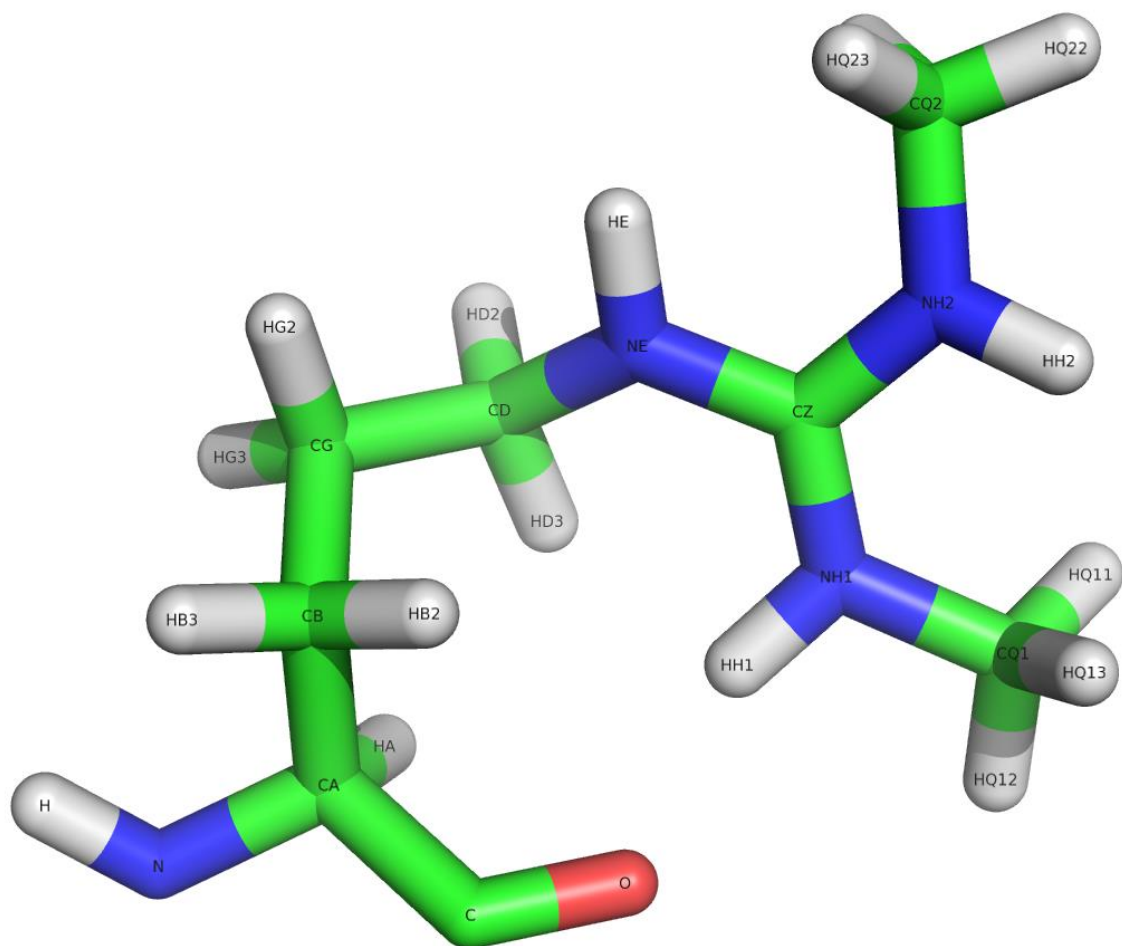

Dimethylarginine (Symmetric) (2MR)  $\beta$ -conformer

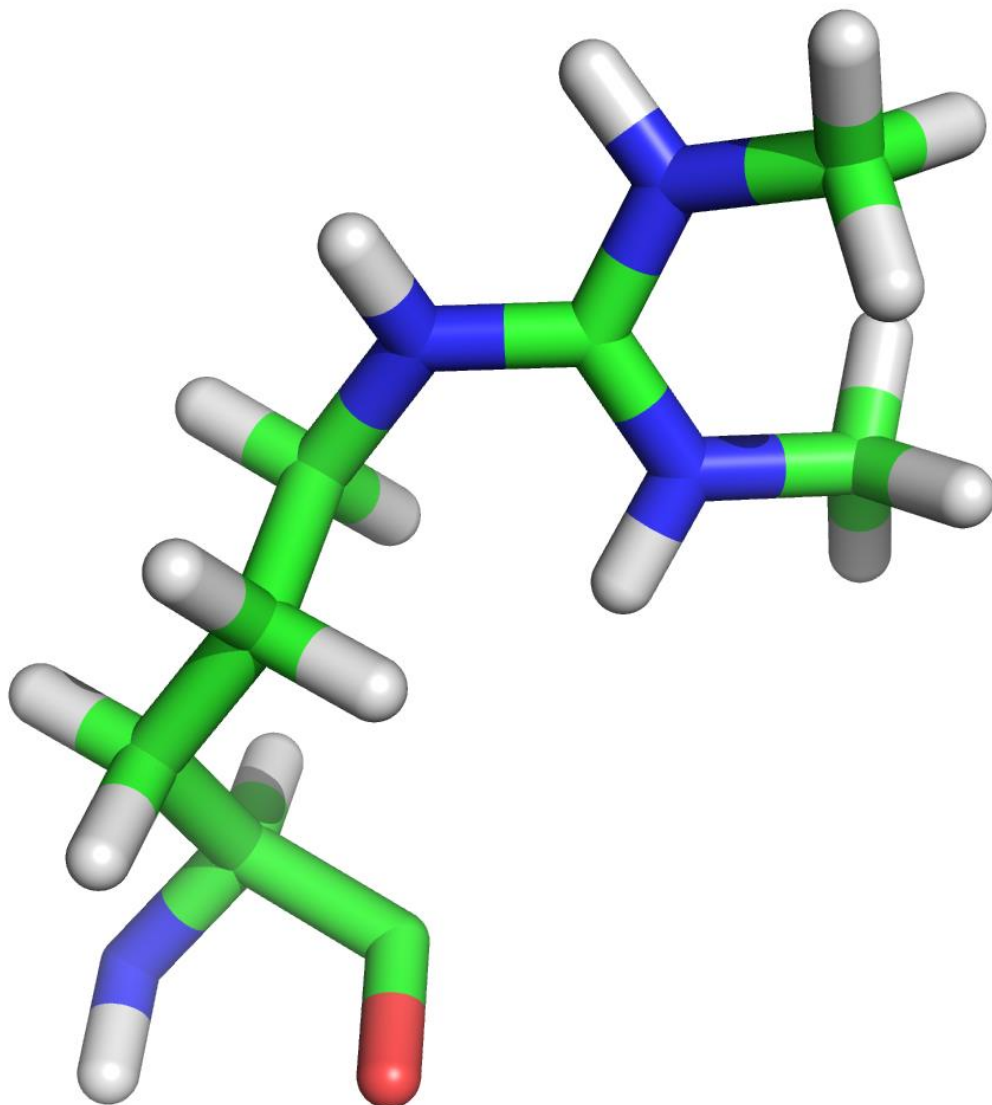



Serine Modifications  
Phosphoserine (neutral) (SEN)  $\alpha$ -conformer

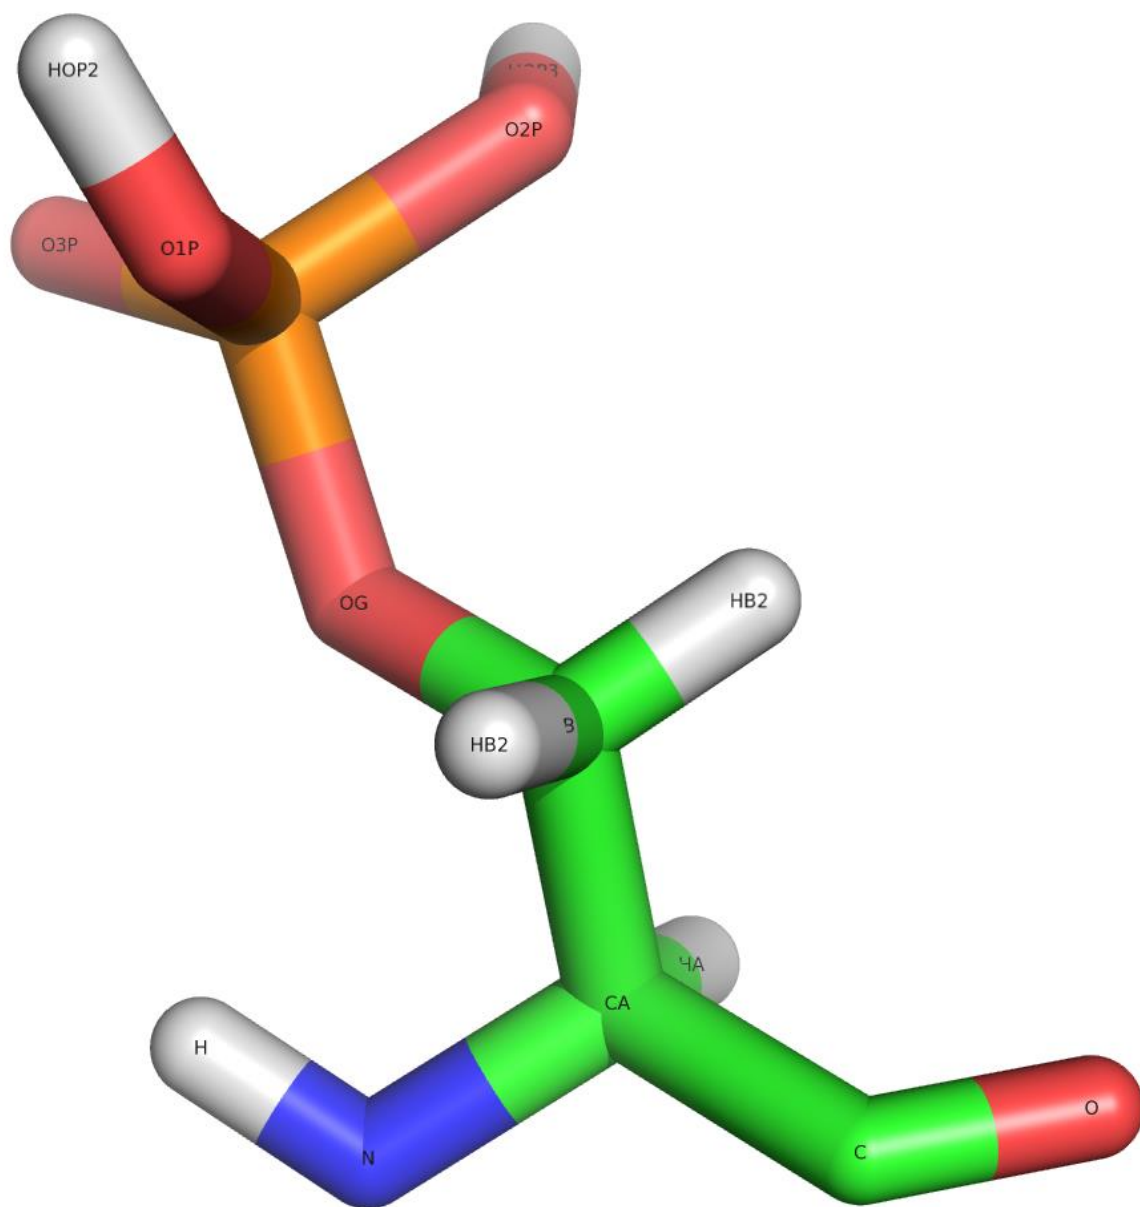

Phosphoserine (neutral) (SEN)  $\beta$ -conformer

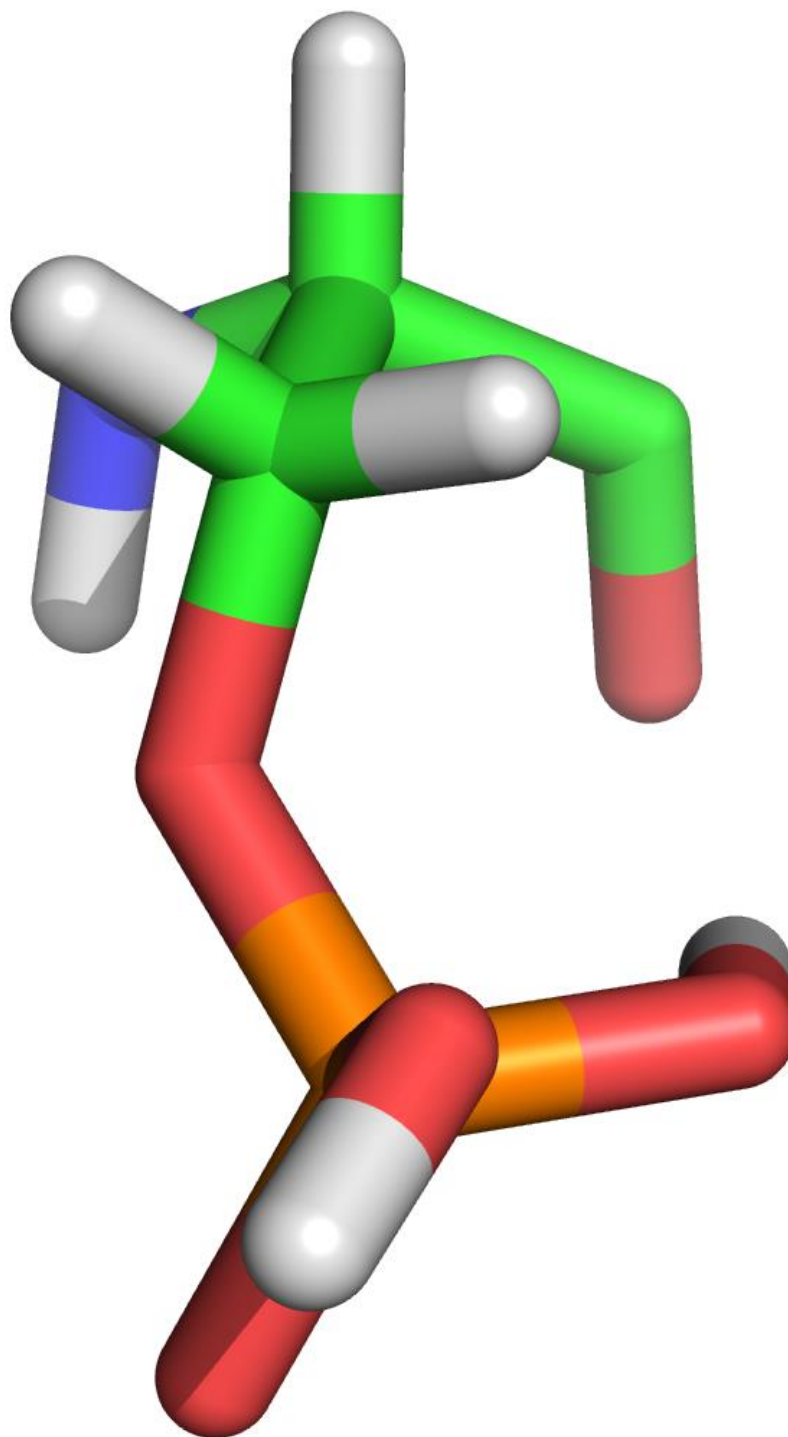

Phosphoserine (-2 charge) (SEP)  $\alpha$ -conformer

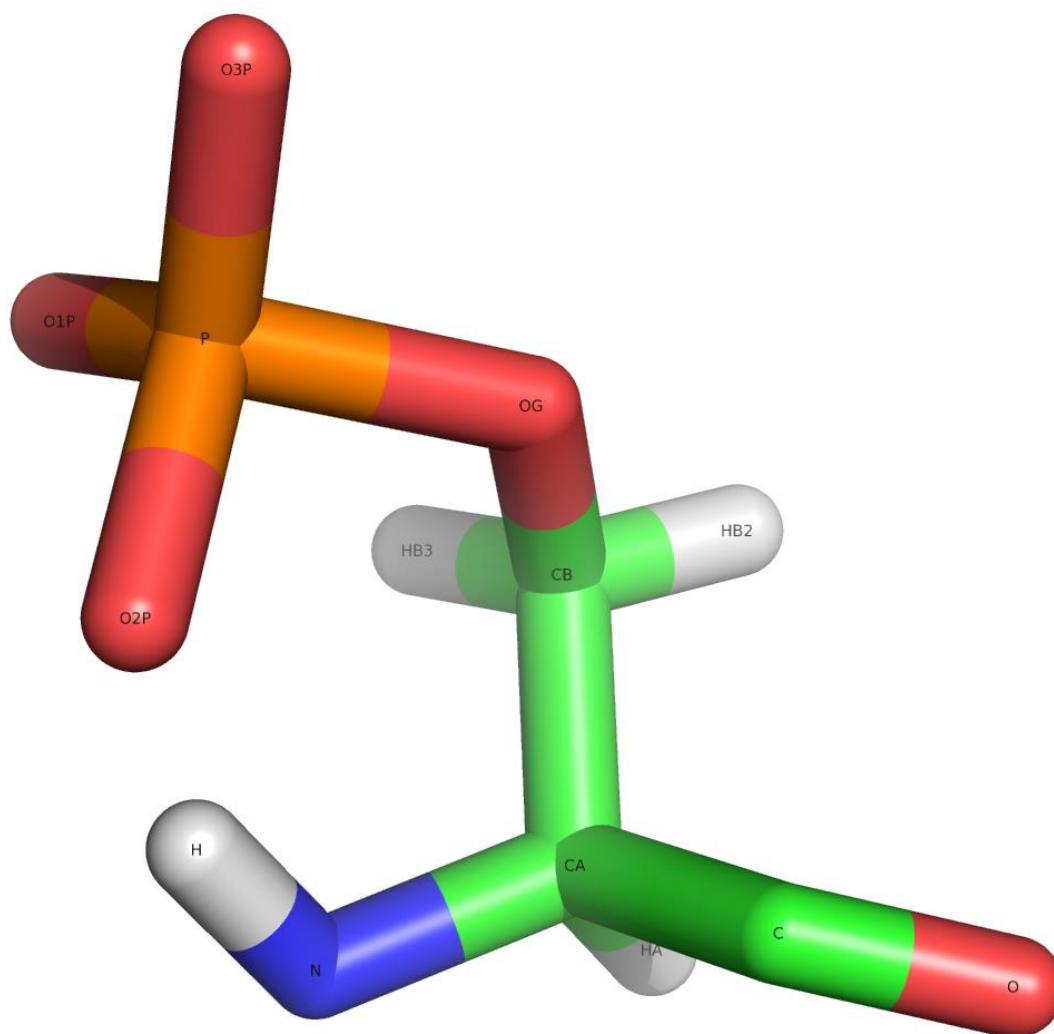

Phosphoserine (-2 charge) (SEP)  $\beta$ -conformer

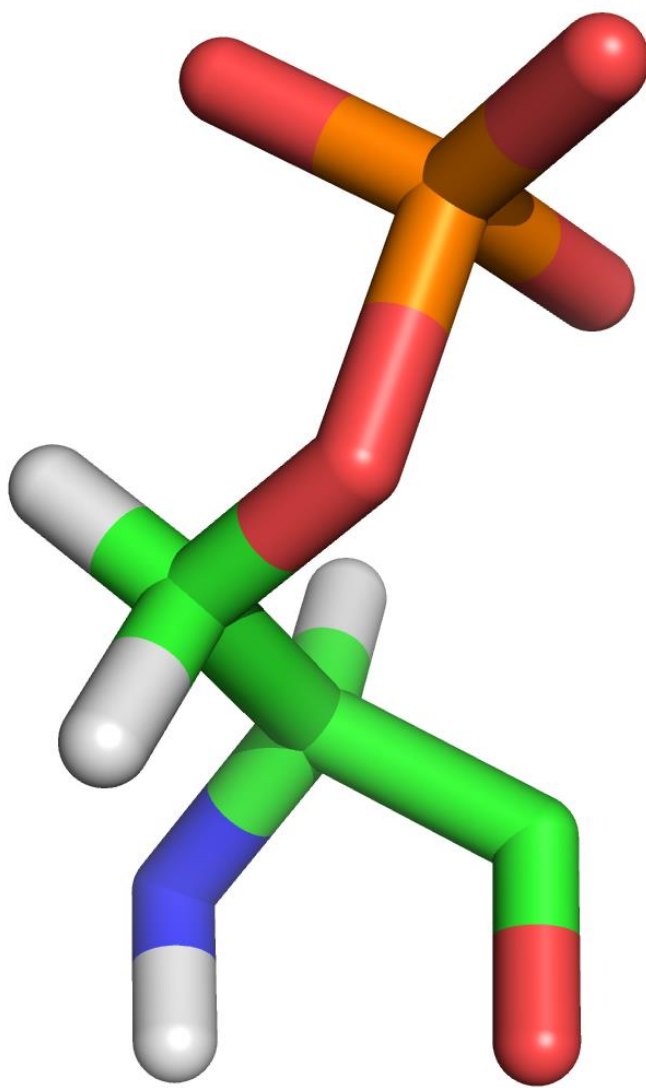

Threonine Modifications  
Phosphothreonine (neutral) (TON)  $\alpha$ -conformer

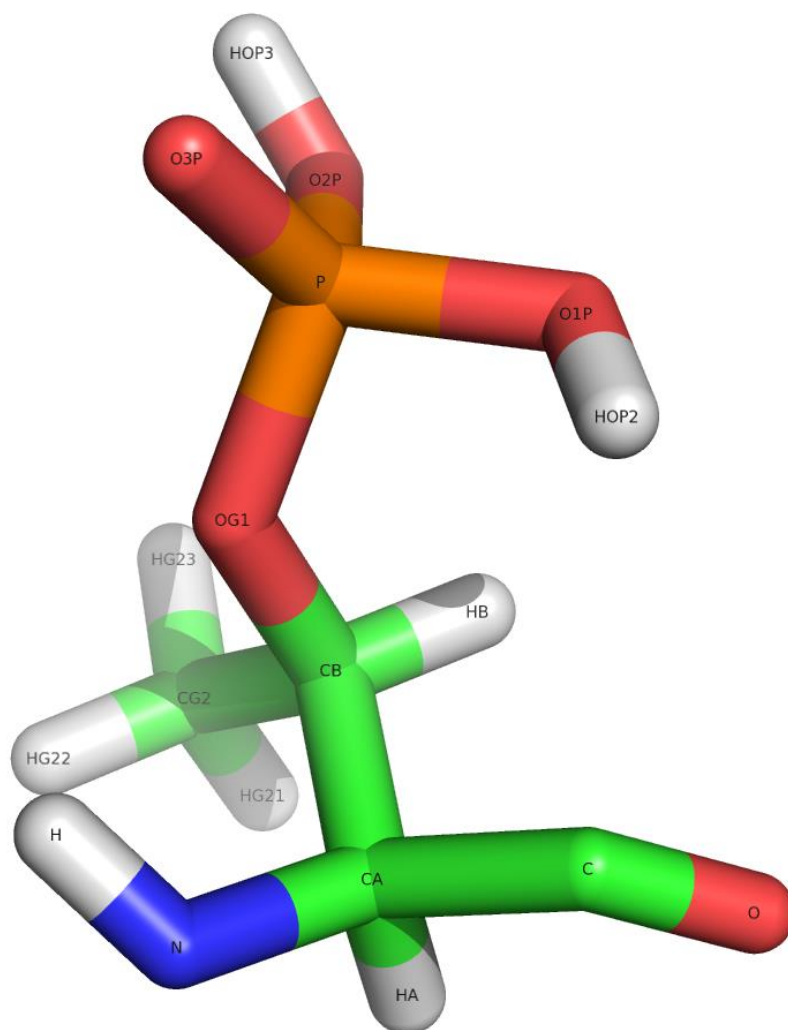

Phosphothreonine (neutral) (TON)  $\beta$ -conformer

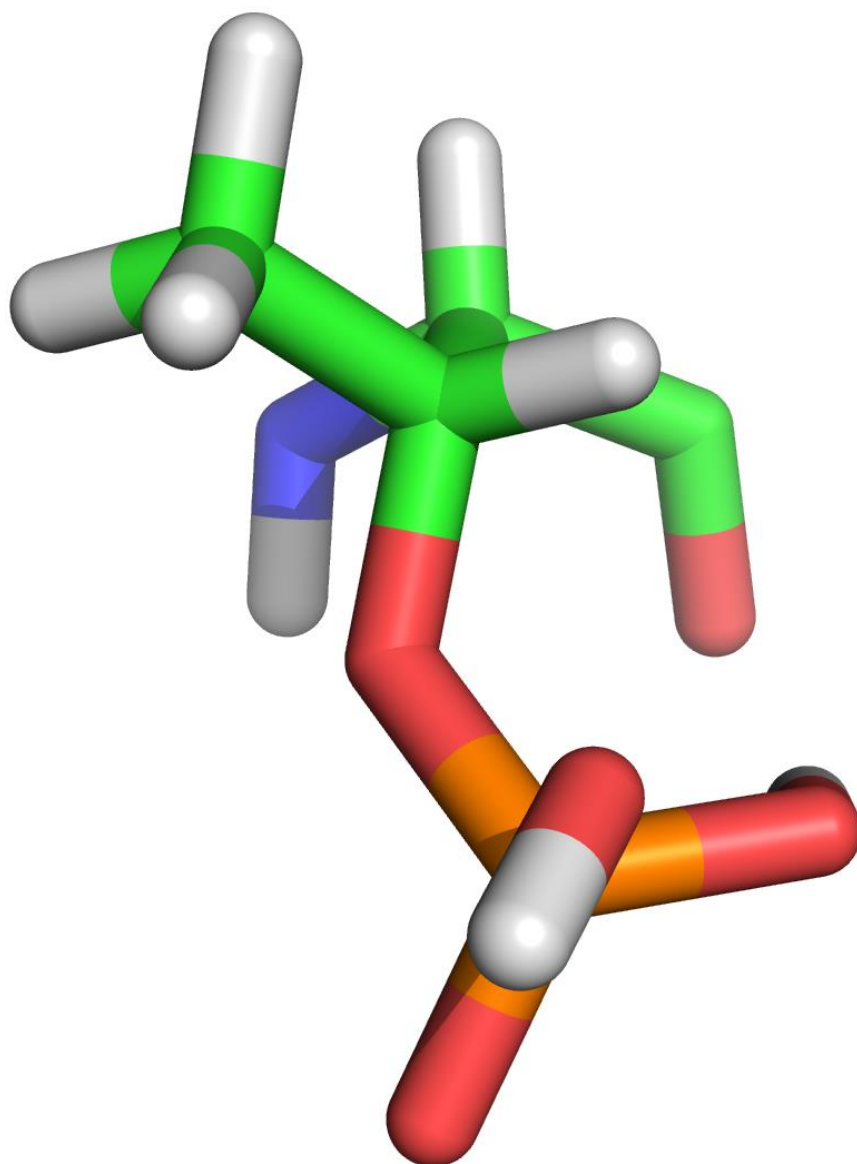

Phosphothreonine (-2 charge) (TPO)  $\alpha$ -conformer

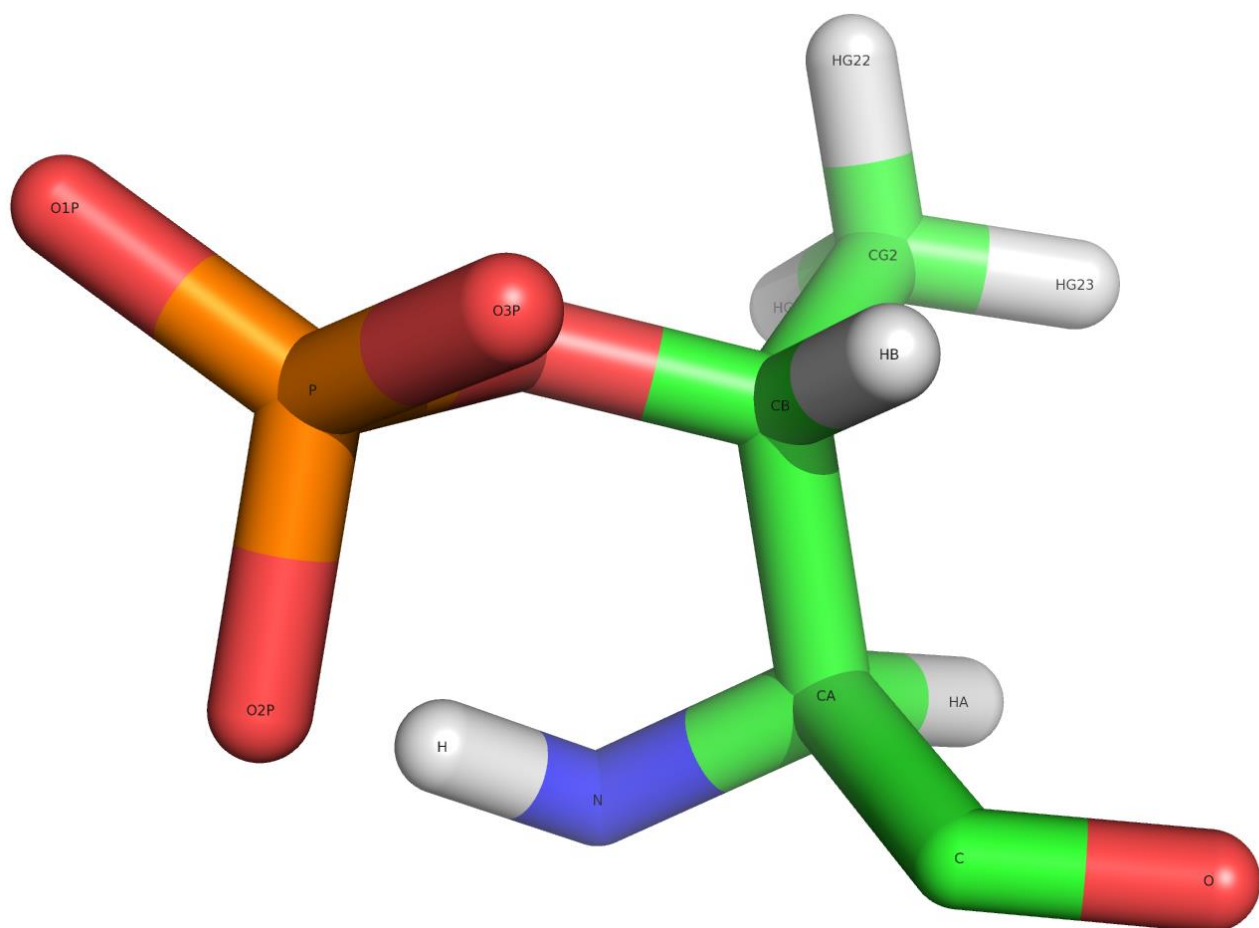

Phosphothreonine (-2 charge) (TPO)  $\beta$ -conformer

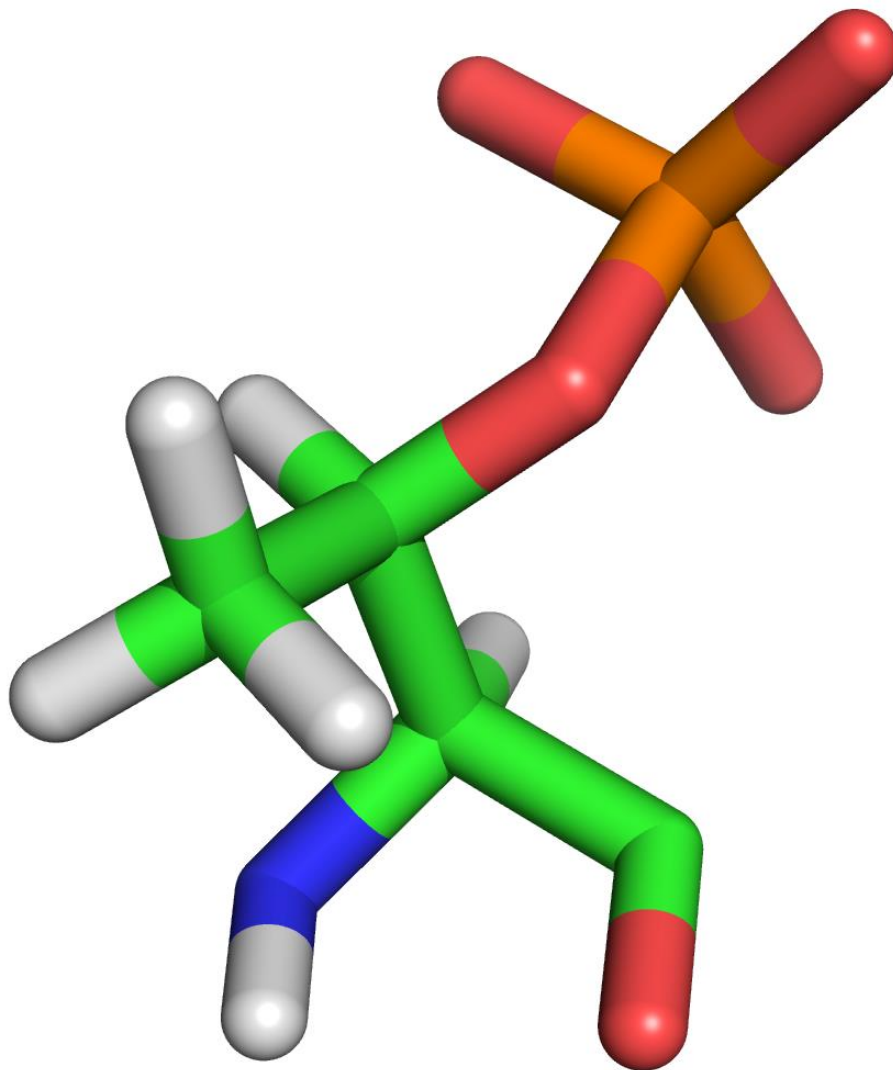



Tryptophan Modifications  
7-hydroxytryptophan (0AF)  $\alpha$ -conformer

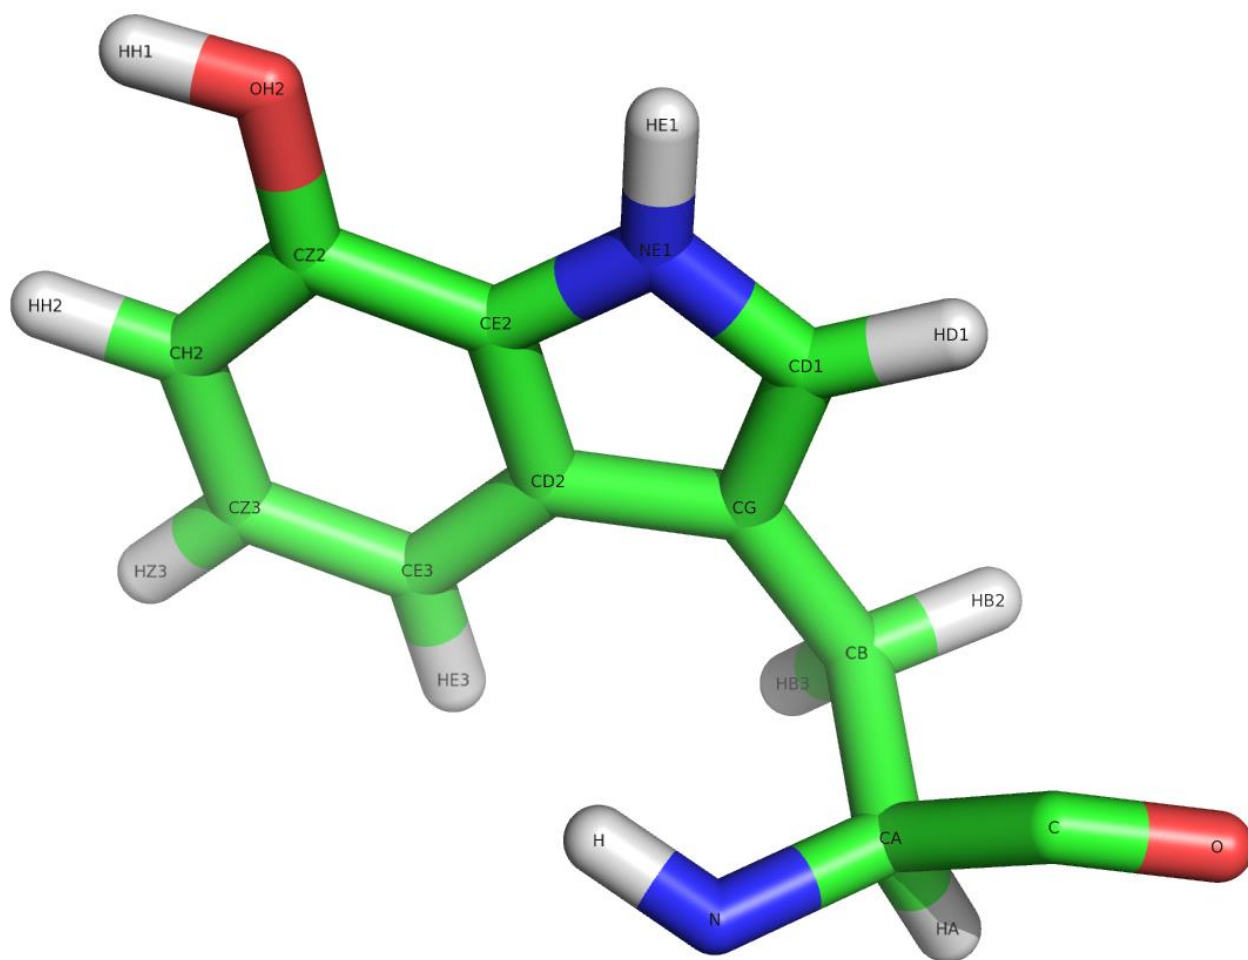

7-hydroxytryptophan (OAF)  $\beta$ -conformer

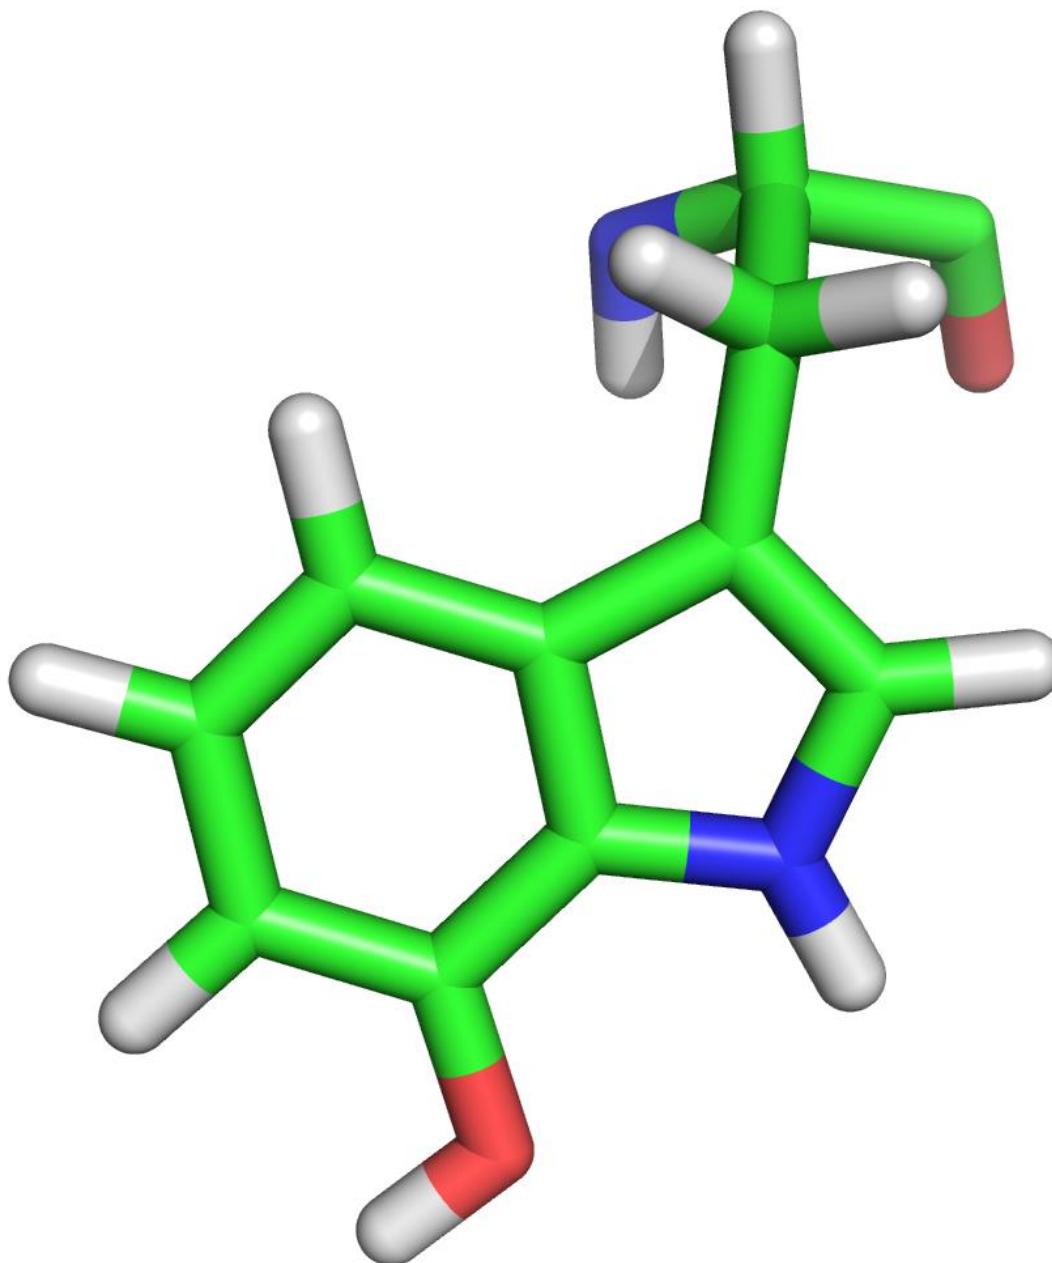

5-hydroxytryptophan (HTR)  $\alpha$ -conformer

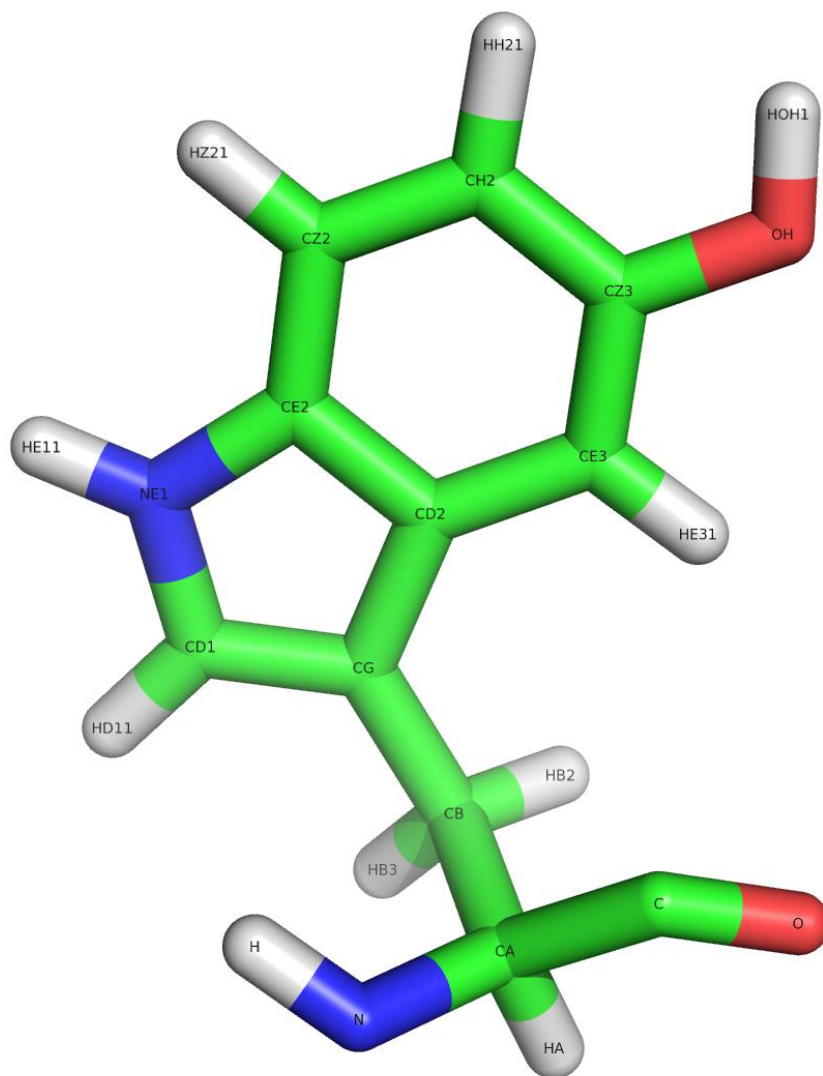

5-hydroxytryptophan (HTR)  $\beta$ -conformer

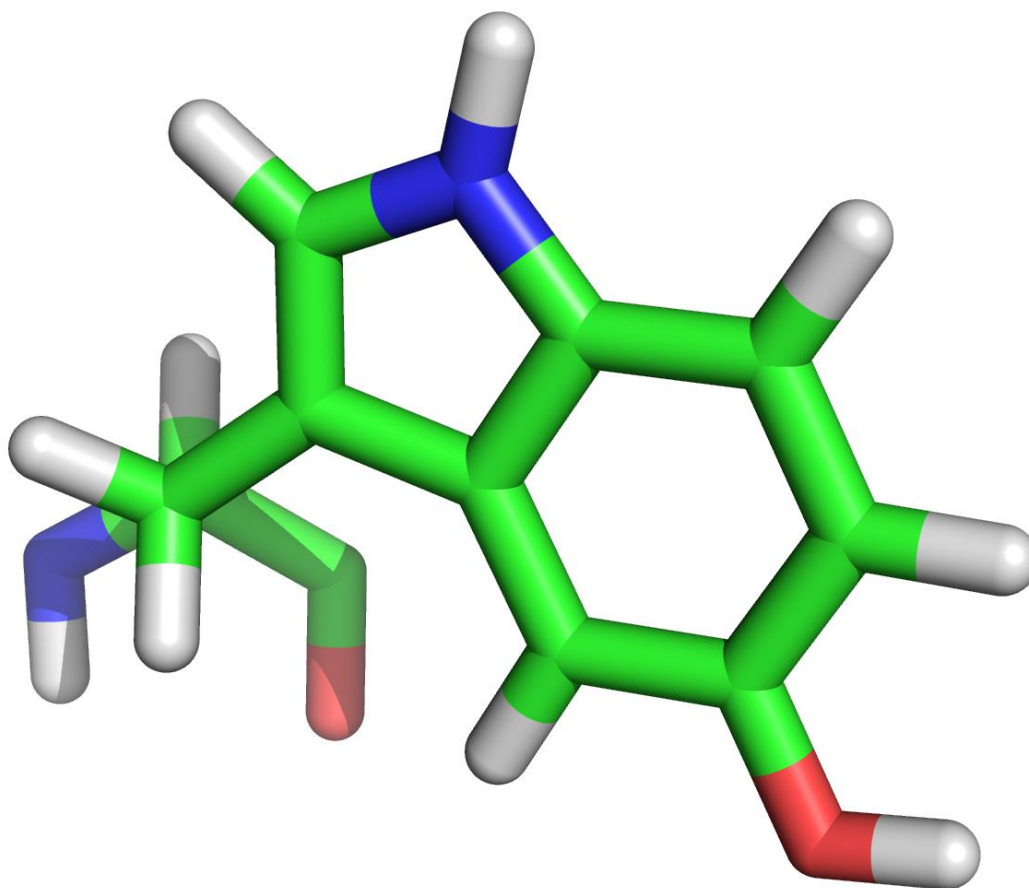

Tyrosine Modifications  
Phosphotyrosine (neutral) (PTN)  $\alpha$ -conformer

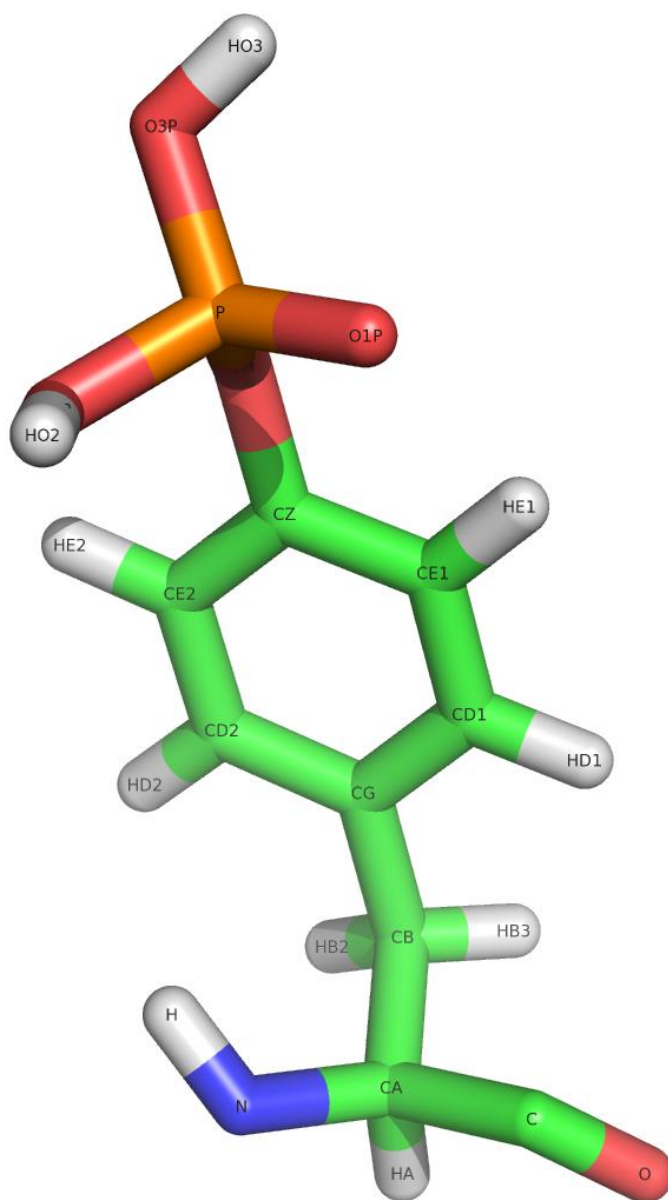

Phosphotyrosine (neutral) (PTN)  $\beta$ -conformer

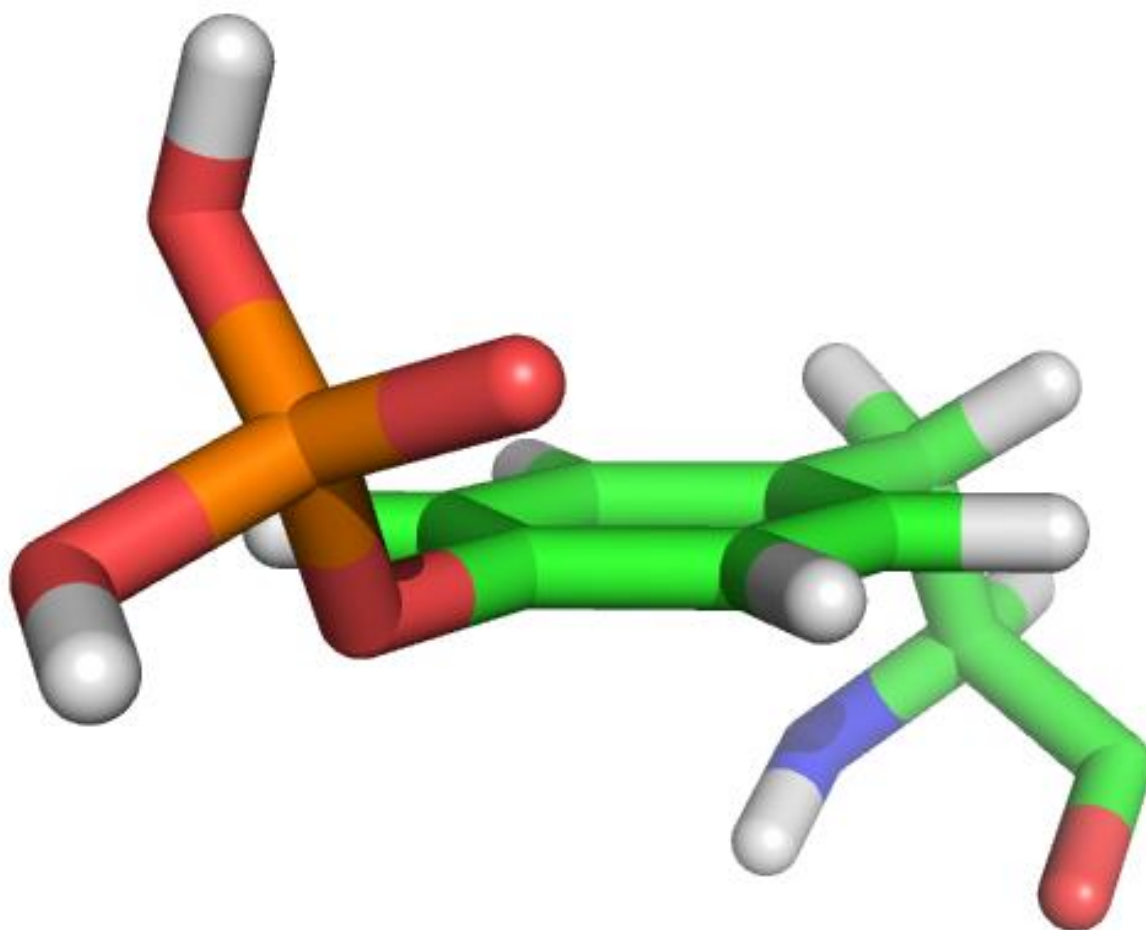

Phosphotyrosine (-2 charge) (PTR)  $\alpha$ -conformer

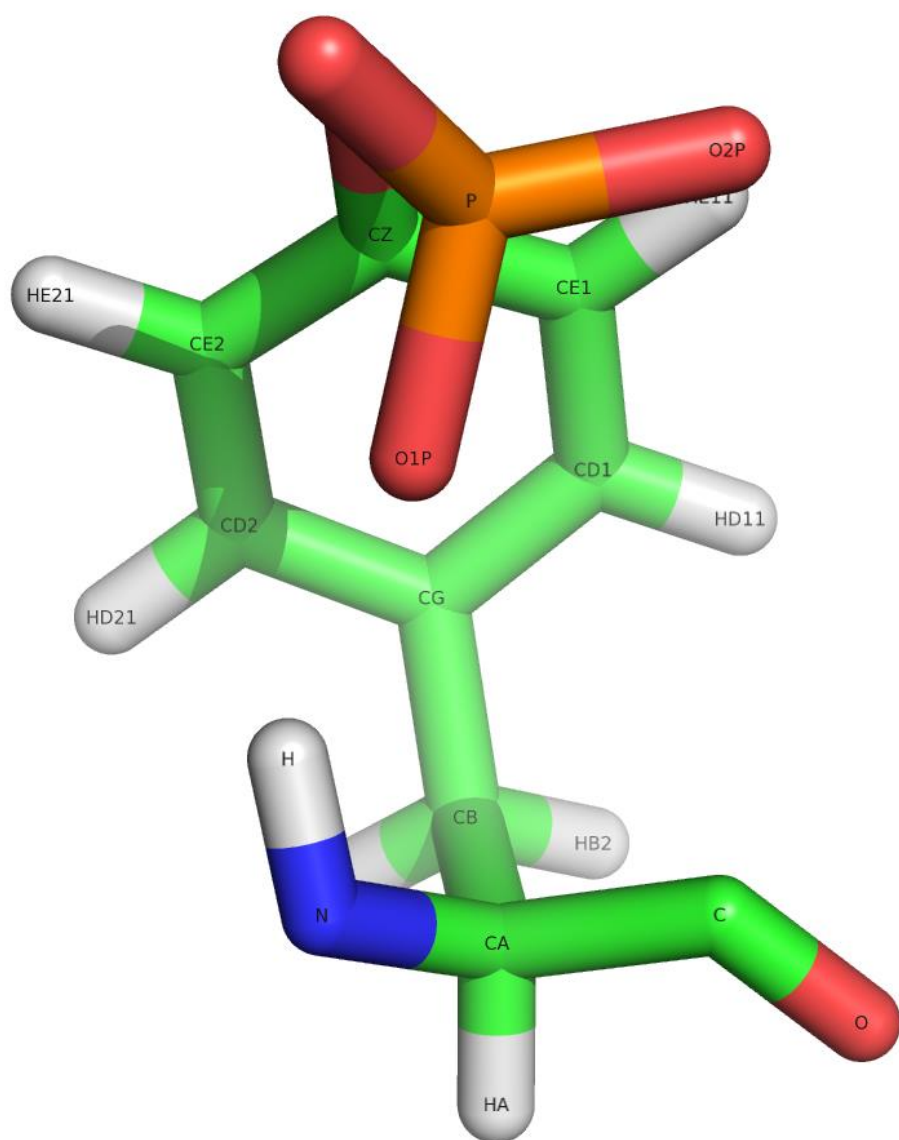

A 3D ball-and-stick model of a complex organic molecule, likely a nucleotide derivative. The structure features a central green chain, a red and orange phosphate group on the left, and a blue and red base on the right. Several white spheres represent hydrogen atoms.



## **1.4 Forcefield Parameters for Each Post-Translational Modification Grouped by Scaffold Residue**

### **1.4.1 Cysteine Modifications**

Table 1: Partial charges assigned to Cysteinepersulfide (CSS)

| ATOM NAME | ATOM TYPE | PARTIAL CHARGE |
|-----------|-----------|----------------|
| N         | N         | -0.31632       |
| H         | H         | 0.246008       |
| CA        | CT        | -0.11831       |
| CB        | CT        | -0.03683       |
| SG        | S         | -0.16663       |
| SD        | SH        | -0.16936       |
| HD1       | HS        | 0.187015       |
| HB1       | H1        | 0.099243       |
| HB2       | H1        | 0.099243       |
| HA        | H1        | 0.121987       |
| C         | C         | 0.631964       |
| O         | O         | -0.57801       |

Table 2: New parameters assigned to Cysteinepersulfide (CSS)

| BOND              |              |               |                  |             |
|-------------------|--------------|---------------|------------------|-------------|
| <i>Atom Types</i> | $K_r$        | $r_{eq}$      | <i>Note</i>      |             |
| S -SH             | 155.8        | 2.067         | same as sh-ss    |             |
| ANGLE             |              |               |                  |             |
| <i>Atom Types</i> | $K_{\Theta}$ | $\Theta_{eq}$ | <i>Note</i>      |             |
| CT-S -SH          | 47.8         | 101.93        | same as c3-ss-sh |             |
| S -SH-HS          | 33.73        | 99.17         | same as hs-sh-ss |             |
| TORSION           |              |               |                  |             |
| <i>Atom Types</i> | $V_n/2$      | $\gamma$      | $n$              | <i>Note</i> |
| CT-S-SH-HS        | 1.623        | 140.097       | -1               | fitted,GK13 |
| CT-S-SH-HS        | 3.652        | -6.4855       | 2                | fitted,GK13 |
| CT-CT-S-SH        | 7.362        | 170.865       | -1               | fitted,GK13 |
| CT-CT-S-SH        | 5.361        | 139.062       | -2               | fitted,GK13 |
| CT-CT-S-SH        | 4.914        | 118.59        | -3               | fitted,GK13 |
| CT-CT-S-SH        | 4.319        | 78.606        | -4               | fitted,GK13 |
| CT-CT-S-SH        | 3.673        | 43.02         | -5               | fitted,GK13 |
| CT-CT-S-SH        | 2.847        | 10.87         | -6               | fitted,GK13 |
| CT-CT-S-SH        | 2.0516       | -18.906       | -7               | fitted,GK13 |
| CT-CT-S-SH        | 1.365        | -48.47        | -8               | fitted,GK13 |
| CT-CT-S-SH        | 0.8598       | -76.77        | -9               | fitted,GK13 |
| CT-CT-S-SH        | 0.5347       | -104.95       | 10               | fitted,GK13 |

Table 3: Partial charges assigned to Cysteine sulfenic acid (CSO)

| ATOM NAME | ATOM TYPE | PARTIAL CHARGE |
|-----------|-----------|----------------|
| N         | N         | -0.60655       |
| H         | H         | 0.336844       |
| CA        | CT        | 0.092053       |
| CB        | CT        | -0.31688       |
| SG        | S         | -0.04901       |
| OD        | OH        | -0.43568       |
| HD1       | HO        | 0.411219       |
| HB1       | H1        | 0.164503       |
| HB2       | H1        | 0.164503       |
| HA        | H1        | 0.093011       |
| C         | C         | 0.759105       |
| O         | O         | -0.61311       |

Table 4: New parameters assigned to Cysteine sulfenic acid (CSO)

| BOND              |              |               |                  |                    |
|-------------------|--------------|---------------|------------------|--------------------|
| <i>Atom Types</i> | $K_r$        | $r_{eq}$      | <i>Note</i>      |                    |
| S -OH             | 265.6        | 1.682         | same as oh-ss    |                    |
| ANGLE             |              |               |                  |                    |
| <i>Atom Types</i> | $K_{\Theta}$ | $\Theta_{eq}$ | <i>Note</i>      |                    |
| CT-S -OH          | 40.85        | 98.28         | same as c3-ss-oh |                    |
| S -OH-HO          | 54.54        | 107.06        | same as ho-oh-ss |                    |
| TORSION           |              |               |                  |                    |
| <i>Atom Types</i> | $V_n/2$      | $\gamma$      | $n$              | <i>Note</i>        |
| CT-S -OH-HO       | 2.4          | 0             | 2                | same as X -oh-ss-X |
| CT-CT-S-OH        | 2.255        | 172.8         | -1               | fitted,GK13        |
| CT-CT-S-OH        | 2.093        | 148.25        | -2               | fitted,GK13        |
| CT-CT-S-OH        | 1.403        | -95.47        | -3               | fitted,GK13        |
| CT-CT-S-OH        | 1.178        | -81.75        | 4                | fitted,GK13        |

Table 5: Partial charges assigned to Phosphocysteine (CSP)

| ATOM NAME | ATOM TYPE | PARTIAL CHARGE |
|-----------|-----------|----------------|
| N         | N         | -0.59379       |
| H         | H         | 0.33177        |
| CA        | CT        | 0.032976       |
| CB        | CT        | -0.17276       |
| SG        | S         | -0.1766        |
| P         | P         | 0.787836       |
| O1P       | OH        | -0.50119       |
| HO1P      | HO        | 0.428307       |
| O3P       | OH        | -0.50119       |
| HO3P      | HO        | 0.428307       |
| O2P       | O2        | -0.59723       |
| HB2       | H1        | 0.109868       |
| HB3       | H1        | 0.109868       |
| HA        | H1        | 0.07981        |
| C         | C         | 0.917801       |
| O         | O         | -0.68378       |

Table 6: New parameters assigned to Phosphocysteine (CSP)

| BOND              |       |          |               |
|-------------------|-------|----------|---------------|
| <i>Atom Types</i> | $K_r$ | $r_{eq}$ | <i>Note</i>   |
| S -P              | 167   | 2.104    | same as p4-ss |

| ANGLE             |              |               |                        |
|-------------------|--------------|---------------|------------------------|
| <i>Atom Types</i> | $K_{\Theta}$ | $\Theta_{eq}$ | <i>Note</i>            |
| S -P -OH          | 80.64        | 100.06        | Calculated empirically |
| OH-P -OH          | 72.99        | 95.71         | same as oh-p4-oh       |
| CT-S -P           | 38.03        | 98.16         | same as c3-ss-p4       |
| S -P -O2          | 75.8         | 116.14        | same as o -p4-ss       |

| TORSION           |         |          |     |                    |
|-------------------|---------|----------|-----|--------------------|
| <i>Atom Types</i> | $V_n/2$ | $\gamma$ | $n$ | <i>Note</i>        |
| CT-S-P-O2         | 0.42884 | -6.1956  | -1  | fitted,GK13        |
| CT-S-P-O2         | 1.099   | -144.466 | -2  | fitted,GK13        |
| CT-S-P-O2         | 0.894   | -0.54663 | -3  | fitted,GK13        |
| CT-S-P-O2         | 0.574   | 145.56   | 4   | fitted,GK13        |
| CT-S-P-OH         | 0.6     | 180      | 2   | same as X -p4-ss-X |

Table 7: Partial charges assigned to S-farnesylcysteine (FCY)

| ATOM NAME | ATOM TYPE | PARTIAL CHARGE |
|-----------|-----------|----------------|
| N         | N         | -0.34734       |
| H         | H         | 0.264484       |
| CA        | CT        | 0.031692       |
| CB        | CT        | -0.26402       |
| SG        | S         | -0.20184       |
| CD        | CT        | -0.10409       |
| CE        | CM        | -0.21892       |
| CZ        | CM        | 0.07085        |
| CH1       | CT        | -0.04273       |
| CQ        | CT        | 0.027635       |
| CI        | CM        | -0.35699       |
| CK        | CM        | 0.090323       |
| CL1       | CT        | -0.04274       |
| CM        | CT        | 0.103421       |
| CN        | CM        | -0.40464       |
| CX        | CM        | 0.29378        |
| CO1       | CT        | -0.44051       |
| HO11      | HC        | 0.121343       |
| HO12      | HC        | 0.121343       |
| HO13      | HC        | 0.121343       |
| CO2       | CT        | -0.44051       |
| HO21      | HC        | 0.121343       |
| HO22      | HC        | 0.121343       |
| HO23      | HC        | 0.121343       |
| HN        | HA        | 0.141831       |
| HM1       | HC        | 0.015946       |
| HM2       | HC        | 0.015946       |
| HL12      | HC        | 0.019779       |
| HL11      | HC        | 0.019779       |
| CL2       | CT        | -0.2463        |
| HL21      | HC        | 0.082942       |
| HL22      | HC        | 0.082942       |
| HL23      | HC        | 0.082942       |
| HI        | HA        | 0.141983       |
| HQ1       | HC        | 0.042875       |
| HQ2       | HC        | 0.042875       |
| HH11      | HC        | 0.036698       |
| HH12      | HC        | 0.036698       |
| CH2       | CT        | -0.37643       |
| HH21      | HC        | 0.118037       |
| HH22      | HC        | 0.118037       |
| HH23      | HC        | 0.118037       |
| HE        | HA        | 0.148475       |
| HD1       | H1        | 0.115815       |
| HD2       | H1        | 0.115815       |
| HB1       | H1        | 0.137424       |
| HB2       | H1        | 0.137424       |
| HA        | H1        | 0.082107       |
| C         | C         | 0.59478        |
| O         | O         | -0.57239       |



Table 8: New parameters assigned to S-farnesylcysteine (FCY)

| <b>ANGLE</b>      |              |               |                  |
|-------------------|--------------|---------------|------------------|
| <i>Atom Types</i> | $K_{\Theta}$ | $\Theta_{eq}$ | <i>Note</i>      |
| CT-CM-CT          | 62.7         | 116.52        | same as c3-c2-c3 |
| S -CT-CM          | 80.52        | 104.97        | same as c2-c3-ss |

Table 9: Partial charges assigned to S-geranylgeranylcysteine (GCY)

| ATOM NAME | ATOM TYPE | PARTIAL CHARGE |
|-----------|-----------|----------------|
| N         | N         | -0.32209       |
| H         | H         | 0.25507        |
| CA        | CT        | -0.03453       |
| CB        | CT        | -0.2502        |
| SG        | S         | -0.20495       |
| CD        | CT        | -0.03557       |
| CE        | CM        | -0.365         |
| CZ        | CM        | 0.09559        |
| CH1       | CT        | -0.05223       |
| CQ        | CT        | 0.104001       |
| CI        | CM        | -0.459         |
| CK        | CM        | 0.129409       |
| CL1       | CT        | -0.10997       |
| CM        | CT        | 0.013532       |
| CN        | CM        | -0.42434       |
| CX        | CM        | 0.137989       |
| CO1       | CT        | -0.08978       |
| CP        | CT        | -0.05759       |
| CR        | CM        | -0.44096       |
| CS        | CM        | 0.356221       |
| CT1       | CT        | -0.44037       |
| HT11      | HC        | 0.117773       |
| HT12      | HC        | 0.117773       |
| HT13      | HC        | 0.117773       |
| CT2       | CT        | -0.44037       |
| HT21      | HC        | 0.117773       |
| HT22      | HC        | 0.117773       |
| HT23      | HC        | 0.117773       |
| HR        | HA        | 0.164711       |
| HP1       | HC        | 0.077291       |
| HP2       | HC        | 0.077291       |
| HO11      | HC        | 0.06016        |
| HO12      | HC        | 0.06016        |
| CO2       | CT        | -0.29253       |
| HO21      | HC        | 0.086703       |
| HO22      | HC        | 0.086703       |
| HO23      | HC        | 0.086703       |
| HN        | HA        | 0.170225       |
| HM1       | HC        | 0.055852       |
| HM2       | HC        | 0.055852       |
| HL11      | HC        | 0.060298       |
| HL12      | HC        | 0.060298       |
| CL2       | CT        | -0.27798       |
| HL21      | HC        | 0.087864       |
| HL22      | HC        | 0.087864       |
| HL23      | HC        | 0.087864       |
| HI        | HA        | 0.16437        |
| HQ1       | HC        | 0.041753       |
| HQ2       | HC        | 0.041753       |
| HH11      | HC        | 0.04612        |
| HH12      | HC        | 0.04612        |
| CH2       | CT        | -0.26946       |
| HH21      | HC        | 0.087994       |
| HH22      | HC        | 0.087994       |
| HH23      | HC        | 0.087994       |
| HE        | HA        | 0.174645       |
| HD1       | H1        | 0.1087         |
| HD2       | H1        | 0.1087         |
| HB1       | H1        | 0.13367        |
| HB2       | H1        | 0.13367        |
| HA        | H1        | 0.090017       |
| C         | C         | 0.609172       |
| O         | O         | -0.56005       |

Table 10: New parameters assigned to S-geranylgeranylcysteine (GCY)

| <b>ANGLE</b>      |              |               |                  |
|-------------------|--------------|---------------|------------------|
| <i>Atom Types</i> | $K_{\Theta}$ | $\Theta_{eq}$ | <i>Note</i>      |
| S -CT-CM          | 80.52        | 104.97        | same as c2-c3-ss |
| CT-CM-CT          | 62.7         | 116.52        | same as c3-c2-c3 |

Table 11: Partial charges assigned to S-palmitoylcysteine (SPC)

| ATOM NAME | ATOM TYPE | PARTIAL CHARGE |
|-----------|-----------|----------------|
| N         | N         | -0.5412        |
| H         | H         | 0.287316       |
| CA        | CT        | 0.015923       |
| CB        | CT        | 0.033953       |
| SG        | S         | -0.25961       |
| CD        | C         | 0.338563       |
| OE2       | O         | -0.39585       |
| CE1       | CT        | 0.003578       |
| CZ        | CT        | 0.03369        |
| CH        | CT        | 0.030442       |
| CQ        | CT        | -0.01959       |
| CI        | CT        | -0.01288       |
| CK        | CT        | 0.006472       |
| CL        | CT        | -0.01233       |
| CM        | CT        | -0.02952       |
| CN        | CT        | 0.011246       |
| CX        | CT        | 0.067084       |
| CO        | CT        | -0.02967       |
| CP        | CT        | -0.01553       |
| CR        | CT        | -0.01001       |
| CS        | CT        | 0.011184       |
| CT        | CT        | -0.10496       |
| HT1       | HC        | 0.025133       |
| HT2       | HC        | 0.025133       |
| HT3       | HC        | 0.025133       |
| HS1       | HC        | 0.004001       |
| HS2       | HC        | 0.004001       |
| HR1       | HC        | 0.005534       |
| HR2       | HC        | 0.005534       |
| HP1       | HC        | 0.01281        |
| HP2       | HC        | 0.01281        |
| HO1       | HC        | 0.000367       |
| HO2       | HC        | 0.000367       |
| HX1       | HC        | -0.01186       |
| HX2       | HC        | -0.01186       |
| HN1       | HC        | -0.00526       |
| HN2       | HC        | -0.00526       |
| HM1       | HC        | 0.003749       |
| HM2       | HC        | 0.003749       |
| HL1       | HC        | 0.004846       |
| HL2       | HC        | 0.004846       |
| HK1       | HC        | 0.001841       |
| HK2       | HC        | 0.001841       |
| HI1       | HC        | 0.008669       |
| HI2       | HC        | 0.008669       |
| HQ1       | HC        | 0.002787       |
| HQ2       | HC        | 0.002787       |
| HH1       | HC        | -0.00472       |
| HH2       | HC        | -0.00472       |
| HZ2       | HC        | 0.000833       |
| HZ1       | HC        | 0.000833       |
| HE12      | HC        | 0.041258       |
| HE11      | HC        | 0.041258       |
| HB1       | H1        | 0.076471       |
| HB2       | H1        | 0.076471       |
| HA        | H1        | 0.084341       |
| C         | C         | 0.757334       |
| O         | O         | -0.60806       |

Table 12: New parameters assigned to S-palmitoylcysteine (SPC)

| BOND        |              |               |                  |                    |
|-------------|--------------|---------------|------------------|--------------------|
| Atom Types  | $K_r$        | $r_{eq}$      | Note             |                    |
| S -C        | 261.9        | 1.762         | same as c -ss    |                    |
| ANGLE       |              |               |                  |                    |
| Atom Types  | $K_{\Theta}$ | $\Theta_{eq}$ | Note             |                    |
| S -C -O     | 81.78        | 122.29        | same as o -c -ss |                    |
| S -C -CT    | 78.99        | 114.32        | same as c3-c -ss |                    |
| CT-S -C     | 38.47        | 100.29        | same as c -ss-c3 |                    |
| TORSION     |              |               |                  |                    |
| Atom Types  | $V_n/2$      | $\gamma$      | $n$              | Note               |
| CT-S -C -O  | 3.1          | 180           | 2                | same as X -c -ss-X |
| CT-S -C -CT | 3.1          | 180           | 2                | same as X -c -ss-X |

### 1.4.2 Glutamic Acid Modifications

Table 13: Partial charges assigned to 1-Carboxyglutamic Acid (CGU)

| ATOM NAME | ATOM TYPE | PARTIAL CHARGE |
|-----------|-----------|----------------|
| N         | N         | -0.36665       |
| H         | H         | 0.258072       |
| CA        | CT        | 0.01712        |
| CB        | CT        | -0.04268       |
| CG        | CT        | -0.13309       |
| CD1       | C         | 0.626223       |
| OE12      | OH        | -0.53738       |
| HE1       | HO        | 0.403134       |
| OE11      | O         | -0.51498       |
| CD2       | C         | 0.626223       |
| OE21      | OH        | -0.53738       |
| HE2       | HO        | 0.403134       |
| OE22      | O         | -0.51498       |
| HG1       | HC        | 0.048251       |
| HB1       | HC        | 0.052153       |
| HB2       | HC        | 0.052153       |
| HA        | H1        | 0.06349        |
| C         | C         | 0.6582         |
| O         | O         | -0.56102       |

Table 14: New parameters assigned to 1-Carboxyglutamic Acid (CGU)

| <b>ANGLE</b>      |              |               |                 |
|-------------------|--------------|---------------|-----------------|
| <i>Atom Types</i> | $K_{\Theta}$ | $\Theta_{eq}$ | <i>Note</i>     |
| C -CT-C           | 64.06        | 111.61        | same as c -c3-c |

Table 15: Partial charges assigned to Pyroglutamic Acid (PCA)

| ATOM NAME | ATOM TYPE | PARTIAL CHARGE |
|-----------|-----------|----------------|
| N         | N         | -0.07406       |
| CD        | C         | 0.477825       |
| OE        | O         | -0.51306       |
| CG        | CT        | -0.07989       |
| HG1       | HC        | 0.06335        |
| HG2       | HC        | 0.06335        |
| CB        | CT        | -0.12097       |
| HB1       | HC        | 0.084138       |
| HB2       | HC        | 0.084138       |
| CA        | CT        | -0.21908       |
| HA        | H1        | 0.096398       |
| C         | C         | 0.720032       |
| O         | O         | -0.58216       |



Table 16: New parameters assigned to Pyroglutamic Acid (PCA)

| <b>ANGLE</b>      |              |               |                 |
|-------------------|--------------|---------------|-----------------|
| <i>Atom Types</i> | $K_{\Theta}$ | $\Theta_{eq}$ | <i>Note</i>     |
| C -N -C           | 65.33        | 127.14        | same as c -n -c |

### 1.4.3 Phenylalanine Modifications

Table 17: Partial charges assigned to Dihydroxyphenylalanine (DAH)

| ATOM NAME | ATOM TYPE | PARTIAL CHARGE |
|-----------|-----------|----------------|
| N         | N         | -0.25072       |
| H         | H         | 0.231704       |
| CA        | CT        | -0.12992       |
| HA        | H1        | 0.117003       |
| CB        | CT        | -0.15007       |
| HB2       | HC        | 0.100437       |
| HB3       | HC        | 0.100437       |
| CG        | CA        | -0.03932       |
| CD1       | CA        | -0.25106       |
| HD1       | HA        | 0.167655       |
| CE1       | CA        | 0.193233       |
| OE2       | OH        | -0.47707       |
| HE2       | HO        | 0.384123       |
| CZ        | CA        | 0.304404       |
| OZ        | OH        | -0.55575       |
| HZ        | HO        | 0.43265        |
| CE2       | CA        | -0.3885        |
| HE1       | HA        | 0.188964       |
| CD2       | CA        | -0.1197        |
| HD2       | HA        | 0.142592       |
| C         | C         | 0.572011       |
| O         | O         | -0.57312       |

#### 1.4.4 Lysine Modifications

Table 18: Partial charges assigned to 5-hydroxylysine (LYZ)

| ATOM NAME | ATOM TYPE | PARTIAL CHARGE |
|-----------|-----------|----------------|
| N         | N         | -0.56082       |
| H         | H         | 0.353086       |
| CA        | CT        | -0.21727       |
| HA        | H1        | 0.174249       |
| CB        | CT        | -0.11071       |
| HB2       | HC        | 0.074178       |
| HB3       | HC        | 0.074178       |
| CG        | CT        | -0.04314       |
| HG2       | HC        | 0.077764       |
| HG3       | HC        | 0.077764       |
| CD        | CT        | 0.012735       |
| HD        | H1        | 0.121196       |
| OH        | OH        | -0.54028       |
| HH        | HO        | 0.387547       |
| CE        | CT        | -0.03624       |
| HE2       | HP        | 0.118663       |
| HE3       | HP        | 0.118663       |
| NZ        | N3        | -0.22955       |
| HZ1       | H         | 0.306198       |
| HZ2       | H         | 0.306198       |
| HZ3       | H         | 0.306198       |
| C         | C         | 0.853628       |
| O         | O         | -0.62425       |

Table 19: Partial charges assigned to  $\epsilon$ -N-methyllysine (MLZ)

| ATOM NAME | ATOM TYPE | PARTIAL CHARGE |
|-----------|-----------|----------------|
| N         | N         | -0.29213       |
| H         | H         | 0.250079       |
| CA        | CT        | -0.13624       |
| HA        | H1        | 0.103386       |
| CB        | CT        | -0.16062       |
| HB2       | HC        | 0.090555       |
| HB3       | HC        | 0.090555       |
| CG        | CT        | 0.001635       |
| HG2       | HC        | 0.039204       |
| HG3       | HC        | 0.039204       |
| CD        | CT        | -0.05403       |
| HD2       | HC        | 0.041825       |
| HD3       | HC        | 0.041825       |
| CE        | CT        | -0.02444       |
| HE2       | HP        | 0.094314       |
| HE3       | HP        | 0.094314       |
| NZ        | N3        | -0.09565       |
| CM        | CT        | -0.24004       |
| HCM1      | HP        | 0.146379       |
| HCM2      | HP        | 0.146379       |
| HCM3      | HP        | 0.146379       |
| HZ2       | H         | 0.303569       |
| HZ3       | H         | 0.303569       |
| C         | C         | 0.722968       |
| O         | O         | -0.65299       |

Table 20: Partial charges assigned to N-ε-acetyllysine (ALY)

| ATOM NAME | ATOM TYPE | PARTIAL CHARGE |
|-----------|-----------|----------------|
| N         | N         | -0.38381       |
| H         | H         | 0.271318       |
| CA        | CT        | -0.06271       |
| HCA       | H1        | 0.098964       |
| CB        | CT        | -0.08326       |
| HB2       | HC        | 0.028979       |
| HB3       | HC        | 0.028979       |
| CG        | CT        | 0.067202       |
| HG2       | HC        | -0.00372       |
| HG3       | HC        | -0.00372       |
| CD        | CT        | 0.153608       |
| HD2       | HC        | -0.00958       |
| HD3       | HC        | -0.00958       |
| CE        | CT        | -0.21575       |
| HE2       | H1        | 0.118563       |
| HE3       | H1        | 0.118563       |
| NZ        | N         | -0.47859       |
| HZ        | H         | 0.328702       |
| CH        | C         | 0.633076       |
| CH3       | CT        | -0.3464        |
| HH31      | HC        | 0.097261       |
| HH32      | HC        | 0.097261       |
| HH33      | HC        | 0.097261       |
| OH        | O         | -0.57744       |
| C         | C         | 0.603212       |
| O         | O         | -0.56837       |

Table 21: Partial charges assigned to N6,N6-dimethyllysine (MLY)

| ATOM NAME | ATOM TYPE | PARTIAL CHARGE |
|-----------|-----------|----------------|
| N         | N         | -0.28707       |
| H         | H         | 0.254897       |
| CA        | CT        | -0.29887       |
| HA        | H1        | 0.140152       |
| CB        | CT        | -0.04291       |
| HB2       | HC        | 0.070701       |
| HB3       | HC        | 0.070701       |
| CG        | CT        | -0.02107       |
| HG2       | HC        | 0.038868       |
| HG3       | HC        | 0.038868       |
| CD        | CT        | -0.1335        |
| HD2       | HC        | 0.074847       |
| HD3       | HC        | 0.074847       |
| CE        | CT        | -0.02158       |
| HE2       | HP        | 0.102404       |
| HE3       | HP        | 0.102404       |
| NZ        | N3        | 0.024782       |
| CH1       | CT        | -0.25932       |
| HH11      | HP        | 0.149515       |
| HH12      | HP        | 0.149515       |
| HH13      | HP        | 0.149515       |
| CH2       | CT        | -0.25932       |
| HH21      | HP        | 0.149515       |
| HH22      | HP        | 0.149515       |
| HH23      | HP        | 0.149515       |
| HZ2       | H         | 0.285085       |
| C         | C         | 0.775625       |
| O         | O         | -0.62765       |

Table 22: Partial charges assigned to N6,N6,N6-trimethyllysine (M3L)

| ATOM NAME | ATOM TYPE | PARTIAL CHARGE |
|-----------|-----------|----------------|
| N         | N         | -0.519066      |
| H         | H         | 0.321251       |
| CA        | CT        | -0.073404      |
| HA        | H1        | 0.117605       |
| CB        | CT        | -0.1614        |
| HB2       | HC        | 0.073951       |
| HB3       | HC        | 0.073951       |
| CG        | CT        | 0.006026       |
| HG2       | HC        | 0.044747       |
| HG3       | HC        | 0.044747       |
| CD        | CT        | -0.029166      |
| HD2       | HC        | 0.052321       |
| HD3       | HC        | 0.052321       |
| CE        | CT        | -0.144224      |
| HE2       | HP        | 0.111726       |
| HE3       | HP        | 0.111726       |
| NZ        | N3        | 0.188994       |
| CM1       | CT        | -0.276341      |
| HM11      | HP        | 0.153734       |
| HM12      | HP        | 0.153734       |
| HM13      | HP        | 0.153734       |
| CM2       | CT        | -0.276341      |
| HM21      | HP        | 0.153734       |
| HM22      | HP        | 0.153734       |
| HM23      | HP        | 0.153734       |
| CM3       | CT        | -0.276341      |
| HM31      | HP        | 0.153734       |
| HM32      | HP        | 0.153734       |
| HM33      | HP        | 0.153734       |
| C         | C         | 0.801193       |
| O         | O         | -0.627883      |

Table 23: Partial charges assigned to Pyrrolysine (PYH)

| ATOM NAME | ATOM TYPE | PARTIAL CHARGE |
|-----------|-----------|----------------|
| N         | N         | -0.47961       |
| H         | H         | 0.292739       |
| CA        | CT        | 0.030245       |
| CB        | CT        | -0.02873       |
| CG        | CT        | 0.087505       |
| CD        | CT        | -0.0075        |
| CE        | CT        | 0.012157       |
| NZ        | N         | -0.21197       |
| CAO       | C         | 0.258518       |
| OAD       | O         | -0.51949       |
| CAR       | CT        | 0.191249       |
| NAL       | N*        | -0.6286        |
| CAF       | CM        | 0.306859       |
| CAJ       | CT        | -0.20624       |
| CAP       | CT        | 0.283346       |
| CAA       | CT        | -0.43443       |
| HAA1      | HC        | 0.097475       |
| HAA2      | HC        | 0.097475       |
| HAA3      | HC        | 0.097475       |
| HAP       | HC        | 0.033557       |
| HAJ1      | HC        | 0.061823       |
| HAJ2      | HC        | 0.061823       |
| HAF       | HA        | 0.059111       |
| HAR       | H1        | 0.089927       |
| HZ        | H         | 0.216413       |
| HE1       | H1        | 0.047707       |
| HE2       | H1        | 0.047707       |
| HD1       | HC        | 0.018973       |
| HD2       | HC        | 0.018973       |
| HG1       | HC        | -0.01941       |
| HG2       | HC        | -0.01941       |
| HB1       | HC        | 0.016614       |
| HB2       | HC        | 0.016614       |
| HA        | H1        | 0.073177       |
| C         | C         | 0.631538       |
| O         | O         | -0.59361       |



Table 24: New parameters assigned to Pyrrolysine (PYH)

| <b>ANGLE</b>      |              |               |                  |
|-------------------|--------------|---------------|------------------|
| <i>Atom Types</i> | $K_{\Theta}$ | $\Theta_{eq}$ | <i>Note</i>      |
| N*-CM-CT          | 64.95        | 122.54        | same as c3-c2-na |
| N*-CM-HA          | 49.73        | 119.1         | same as hc-c2-na |
| C -CT-N*          | 66.81        | 111.37        | same as c -c3-na |

Table 25: Partial charges assigned to Ornithine (ORN)

| ATOM NAME | ATOM TYPE | PARTIAL CHARGE |
|-----------|-----------|----------------|
| N         | N         | -0.34585       |
| H         | H         | 0.264421       |
| CA        | CT        | -0.0387        |
| CB        | CT        | -0.08467       |
| CG        | CT        | 0.01586        |
| CD        | CT        | 0.036406       |
| NE        | N3        | -0.31589       |
| HE1       | H         | 0.304808       |
| HE2       | H         | 0.304808       |
| HE3       | H         | 0.304808       |
| HD2       | HP        | 0.083019       |
| HD3       | HP        | 0.083019       |
| HG2       | HC        | 0.036471       |
| HG3       | HC        | 0.036471       |
| HB1       | HC        | 0.05758        |
| HB2       | HC        | 0.05758        |
| HA        | H1        | 0.052081       |
| C         | C         | 0.765002       |
| O         | O         | -0.61723       |

Table 26: Partial charges assigned to N6-propanoyllysine (PRK)

| ATOM NAME | ATOM TYPE | PARTIAL CHARGE |
|-----------|-----------|----------------|
| N         | N         | -0.53557       |
| H         | H         | 0.284431       |
| CA        | CT        | 0.173956       |
| CB        | CT        | -0.04782       |
| CG        | CT        | 0.03087        |
| CD        | CT        | 0.057953       |
| CE        | CT        | 0.10608        |
| NZ        | N         | -0.56466       |
| CAL       | C         | 0.586851       |
| CAF       | CT        | 0.108525       |
| CAA       | CT        | -0.12553       |
| HAA       | HC        | 0.027248       |
| HAAA      | HC        | 0.027248       |
| HAAB      | HC        | 0.027248       |
| HAF       | HC        | -0.01501       |
| HAFA      | HC        | -0.01501       |
| OAD       | O         | -0.58184       |
| HZ        | H         | 0.304349       |
| HE2       | H1        | 0.031469       |
| HE3       | H1        | 0.031469       |
| HD2       | HC        | -0.00579       |
| HD3       | HC        | -0.00579       |
| HG2       | HC        | 0.000862       |
| HG3       | HC        | 0.000862       |
| HB2       | HC        | 0.019933       |
| HB3       | HC        | 0.019933       |
| HA        | H1        | -0.00996       |
| C         | C         | 0.668112       |
| O         | O         | -0.60042       |

Table 27: Partial charges assigned to N6-butanoyllysine (BTK)

| ATOM NAME | ATOM TYPE | PARTIAL CHARGE |
|-----------|-----------|----------------|
| N         | N         | -0.29559       |
| H         | H         | 0.260432       |
| CA        | CT        | -0.65983       |
| CB        | CT        | -0.02307       |
| CG        | CT        | -0.02617       |
| CD        | CT        | -0.06617       |
| CE        | CT        | 0.012051       |
| NZ        | N         | -0.48779       |
| CAN       | C         | 0.529418       |
| CAJ       | CT        | -0.05549       |
| CAF       | CT        | 0.19493        |
| CAA       | CT        | -0.33896       |
| HAA       | HC        | 0.077688       |
| HAAA      | HC        | 0.077688       |
| HAAB      | HC        | 0.077688       |
| HAF       | HC        | -0.00843       |
| HAFA      | HC        | -0.00843       |
| HAJ       | HC        | 0.014412       |
| HAJA      | HC        | 0.014412       |
| OAD       | O         | -0.55978       |
| HNZ       | H         | 0.316053       |
| HE2       | H1        | 0.07213        |
| HE3       | H1        | 0.07213        |
| HD2       | HC        | 0.035549       |
| HD3       | HC        | 0.035549       |
| HG2       | HC        | 0.044502       |
| HG3       | HC        | 0.044502       |
| HB2       | HC        | 0.072294       |
| HB3       | HC        | 0.072294       |
| HA        | H1        | 0.259731       |
| C         | C         | 0.886022       |
| O         | O         | -0.63977       |

### 1.4.5 Proline Modifications

Table 28: Partial charges assigned to 3,4-hydroxyproline (DHP)

| ATOM NAME | ATOM TYPE | PARTIAL CHARGE |
|-----------|-----------|----------------|
| N         | N         | -0.08371       |
| CD1       | CT        | -0.18024       |
| HD11      | H1        | 0.101469       |
| HD12      | H1        | 0.101469       |
| CG1       | CT        | 0.177548       |
| HG1       | H1        | 0.132692       |
| OD2       | OH        | -0.62756       |
| HD21      | HO        | 0.429709       |
| CB        | CT        | 0.092582       |
| HB1       | H1        | 0.105269       |
| OG2       | OH        | -0.57053       |
| HG21      | HO        | 0.411146       |
| CA        | CT        | -0.3098        |
| HA        | H1        | 0.133011       |
| C         | C         | 0.685117       |
| O         | O         | -0.59817       |

Table 29: Partial charges assigned to 3-hydroxyproline (HY3)

| ATOM NAME | ATOM TYPE | PARTIAL CHARGE |
|-----------|-----------|----------------|
| N         | N         | -0.1976        |
| CD        | CT        | -0.03236       |
| HD1       | H1        | 0.063033       |
| HD2       | H1        | 0.063033       |
| CG1       | CT        | -0.15073       |
| HG11      | HC        | 0.089019       |
| HG12      | HC        | 0.089019       |
| CB        | CT        | 0.207207       |
| HB1       | H1        | 0.043876       |
| OG2       | OH        | -0.59443       |
| HG21      | HO        | 0.380575       |
| CA        | CT        | -0.00277       |
| HA        | H1        | 0.078151       |
| C         | C         | 0.500171       |
| O         | O         | -0.53619       |

Table 30: Partial charges assigned to 4-hydroxyproline (HYP)

| ATOM NAME | ATOM TYPE | PARTIAL CHARGE |
|-----------|-----------|----------------|
| N         | N         | -0.13142       |
| CD        | CT        | -0.24411       |
| HD21      | H1        | 0.105581       |
| HD22      | H1        | 0.105581       |
| CG        | CT        | 0.319283       |
| HG1       | H1        | 0.066129       |
| OD1       | OH        | -0.65864       |
| HD11      | HO        | 0.429398       |
| CB        | CT        | -0.08497       |
| HB1       | HC        | 0.039646       |
| HB2       | HC        | 0.039646       |
| CA        | CT        | -0.11104       |
| HA        | H1        | 0.102544       |
| C         | C         | 0.59469        |
| O         | O         | -0.57232       |

#### **1.4.6 Arginine Modifications**



Table 31: Partial charges assigned to Dimethylarginine (Anti-symmetric) (DA2)

| ATOM NAME | ATOM TYPE | PARTIAL CHARGE |
|-----------|-----------|----------------|
| N         | N         | -0.376741      |
| H         | H         | 0.270465       |
| CA        | CT        | -0.119858      |
| CB        | CT        | -0.129377      |
| CG        | CT        | -0.016346      |
| CD        | CT        | -0.092919      |
| NE        | N2        | -0.288262      |
| CZ        | CM        | 0.186646       |
| NH1       | N2        | 0.057692       |
| C1        | CT        | -0.204521      |
| HC11      | H1        | 0.116462       |
| HC12      | H1        | 0.116462       |
| HC13      | H1        | 0.116462       |
| C2        | CT        | -0.204521      |
| HC21      | H1        | 0.116462       |
| HC22      | H1        | 0.116462       |
| HC23      | H1        | 0.116462       |
| NH2       | N2        | -0.468942      |
| HN1       | H         | 0.317322       |
| HN2       | H         | 0.317322       |
| HNE       | H         | 0.297160       |
| HCD1      | H1        | 0.113491       |
| HCD2      | H1        | 0.113491       |
| HCG1      | HC        | 0.055975       |
| HCG2      | HC        | 0.055975       |
| HCB1      | HC        | 0.078332       |
| HCB2      | HC        | 0.078332       |
| HCA       | H1        | 0.106985       |
| C         | C         | 0.770687       |
| O         | O         | -0.617160      |

Table 32: New parameters assigned to Dimethylarginine (Anti-symmetric) (DA2)

| BOND              |              |               |                        |                    |
|-------------------|--------------|---------------|------------------------|--------------------|
| <i>Atom Types</i> | $K_r$        | $r_{eq}$      | <i>Note</i>            |                    |
| N2-CM             | 449          | 1.364         | same as cc-nh          |                    |
| ANGLE             |              |               |                        |                    |
| <i>Atom Types</i> | $K_{\Theta}$ | $\Theta_{eq}$ | <i>Note</i>            |                    |
| N2-CM-N2          | 72.93        | 115.96        | same as nh-cc-nh       |                    |
| CT-N2-CM          | 64.702       | 117.79        | Calculated empirically |                    |
| H -N2-CM          | 49.11        | 119.38        | same as c2-n3-hn       |                    |
| CT-N2-CT          | 64.01        | 110.9         | same as c3-n3-c3       |                    |
| TORSION           |              |               |                        |                    |
| <i>Atom Types</i> | $V_n/2$      | $\gamma$      | $n$                    | <i>Note</i>        |
| N2-CM-N2-H        | 0.3          | 180           | 2                      | same as X -c2-n3-X |
| CT-N2-CM-N2       | 0.4566       | 2.705         | -1                     | fitted,GK13        |
| CT-N2-CM-N2       | 12.726       | -175.79       | -2                     | fitted,GK13        |
| CT-N2-CM-N2       | 0.283        | -173.945      | -3                     | fitted,GK13        |
| CT-N2-CM-N2       | 0.1875       | -161.375      | 4                      | fitted,GK13        |

Table 33: Partial charges assigned to  $\omega$ -Methylarginine (DA1)

| ATOM NAME | ATOM TYPE | PARTIAL CHARGE |
|-----------|-----------|----------------|
| N         | N         | -0.50278       |
| H         | H         | 0.314656       |
| CA        | CT        | 0.00531        |
| CB        | CT        | -0.15979       |
| CG        | CT        | -0.12551       |
| CD        | CT        | 0.109358       |
| NE        | N2        | -0.57122       |
| CZ        | CM        | 0.476462       |
| NH1       | N2        | -0.61243       |
| HH11      | H         | 0.364073       |
| HH12      | H         | 0.364073       |
| NH2       | N2        | -0.30094       |
| C1        | CT        | -0.19592       |
| HC11      | H1        | 0.129204       |
| HC12      | H1        | 0.129204       |
| HC12      | H1        | 0.129204       |
| HH2       | H         | 0.308468       |
| HNE       | H         | 0.406059       |
| HCD1      | H1        | 0.0707         |
| HCD2      | H1        | 0.0707         |
| HCG1      | HC        | 0.088214       |
| HCG2      | HC        | 0.088214       |
| HCB1      | HC        | 0.08218        |
| HCB2      | HC        | 0.08218        |
| HCA       | H1        | 0.110595       |
| C         | C         | 0.709342       |
| O         | O         | -0.56962       |

Table 34: New parameters assigned to  $\omega$ -Methylarginine (DA1)

| BOND        |              |               |                        |                    |
|-------------|--------------|---------------|------------------------|--------------------|
| Atom Types  | $K_r$        | $r_{eq}$      | Note                   |                    |
| N2-CM       | 449          | 1.364         | same as cc-nh          |                    |
| ANGLE       |              |               |                        |                    |
| Atom Types  | $K_{\Theta}$ | $\Theta_{eq}$ | Note                   |                    |
| N2-CM-N2    | 72.93        | 115.96        | same as nh-cc-nh       |                    |
| CT-N2-CM    | 64.702       | 117.79        | Calculated empirically |                    |
| H -N2-CM    | 49.11        | 119.38        | same as c2-n3-hn       |                    |
| TORSION     |              |               |                        |                    |
| Atom Types  | $V_n/2$      | $\gamma$      | $n$                    | Note               |
| N2-CM-N2-H  | 0.3          | 180           | 2                      | same as X -c2-n3-X |
| CT-N2-CM-N2 | 0.3          | 180           | 2                      | same as X -c2-n3-X |

Table 35: Partial charges assigned to Dimethylarginine (Symmetric) (2MR)

| ATOM NAME | ATOM TYPE | PARTIAL CHARGE |
|-----------|-----------|----------------|
| N         | N         | -0.33626       |
| H         | H         | 0.255401       |
| CA        | CT        | -0.03012       |
| HA        | H1        | 0.054492       |
| CB        | CT        | -0.10153       |
| HB2       | HC        | 0.050864       |
| HB3       | HC        | 0.050864       |
| CG        | CT        | 0.032724       |
| HG2       | HC        | 0.033302       |
| HG3       | HC        | 0.033302       |
| CD        | CT        | 0.034682       |
| HD2       | H1        | 0.071285       |
| HD3       | H1        | 0.071285       |
| NE        | N2        | -0.32964       |
| HE        | H         | 0.321023       |
| CZ        | CM        | 0.13247        |
| NH1       | N2        | -0.11712       |
| CQ1       | CT        | -0.32341       |
| HQ11      | H1        | 0.151691       |
| HQ12      | H1        | 0.151691       |
| HQ13      | H1        | 0.151691       |
| HH1       | H         | 0.270505       |
| NH2       | N2        | -0.11712       |
| CQ2       | CT        | -0.32341       |
| HQ21      | H1        | 0.151691       |
| HQ22      | H1        | 0.151691       |
| HQ23      | H1        | 0.151691       |
| HH2       | H         | 0.270505       |
| C         | C         | 0.650222       |
| O         | O         | -0.56445       |

Table 36: New parameters assigned to Dimethylarginine (Symmetric) (2MR)

| BOND              |            |               |                        |                    |
|-------------------|------------|---------------|------------------------|--------------------|
| <i>Atom Types</i> | $K_r$      | $r_{eq}$      | <i>Note</i>            |                    |
| CT-N2             | 320.6      | 1.47          | same as c3-n3          |                    |
| N2-CM             | 449        | 1.364         | same as cc-nh          |                    |
| ANGLE             |            |               |                        |                    |
| <i>Atom Types</i> | $K_\Theta$ | $\Theta_{eq}$ | <i>Note</i>            |                    |
| CT-N2-CM          | 64.702     | 117.79        | Calculated empirically |                    |
| N2-CM-N2          | 72.93      | 115.96        | same as nh-cc-nh       |                    |
| H -N2-CM          | 49.11      | 119.38        | same as c2-n3-hn       |                    |
| TORSION           |            |               |                        |                    |
| <i>Atom Types</i> | $V_n/2$    | $\gamma$      | $n$                    | <i>Note</i>        |
| N2-CM-N2-H        | 0.3        | 180           | 2                      | same as X -c2-n3-X |
| CT-N2-CM-N2       | 0.3        | 180           | 2                      | same as X -c2-n3-X |

### 1.4.7 Serine Modifications

Table 37: Partial charges assigned to neutral Phosphoserine (SEN)

| ATOM NAME | ATOM TYPE | PARTIAL CHARGE |
|-----------|-----------|----------------|
| N         | N         | -0.22283       |
| H         | H         | 0.256767       |
| CA        | CT        | -0.49904       |
| CB        | CT        | -0.03007       |
| OG        | OS        | -0.23226       |
| P         | P         | 0.94873        |
| O1P       | OH        | -0.5705        |
| HOP2      | HO        | 0.45302        |
| O2P       | OH        | -0.5705        |
| HOP3      | HO        | 0.45302        |
| O3P       | O2        | -0.64688       |
| HB2       | H1        | 0.129004       |
| HB2       | H1        | 0.129004       |
| HA        | H1        | 0.224707       |
| C         | C         | 0.779535       |
| O         | O         | -0.60172       |

Table 38: New parameters assigned to neutral Phosphoserine (SEN)

| BOND              |              |               |                           |             |
|-------------------|--------------|---------------|---------------------------|-------------|
| <i>Atom Types</i> | $K_r$        | $r_{eq}$      | <i>Note</i>               |             |
| OH - P            | 525          | 1.61          | Adapted from <sup>1</sup> |             |
| OS - P            | 525          | 1.61          | Adapted from <sup>1</sup> |             |
| ANGLE             |              |               |                           |             |
| <i>Atom Types</i> | $K_{\Theta}$ | $\Theta_{eq}$ | <i>Note</i>               |             |
| CT - OS - P       | 100          | 120.5         | Adapted from <sup>1</sup> |             |
| O2 - P - OH       | 140          | 108.23        | Adapted from <sup>1</sup> |             |
| HO - OH - P       | 140          | 108.5         | Adapted from <sup>1</sup> |             |
| OH-P -OH          | 72.99        | 95.71         | same as oh-p4-oh          |             |
| TORSION           |              |               |                           |             |
| <i>Atom Types</i> | $V_n/2$      | $\gamma$      | $n$                       | <i>Note</i> |
| CT-OS-P-O2        | 1.004        | -20.493       | -1                        | fittedGK13  |
| CT-OS-P-O2        | 0.664        | 3.177         | -2                        | fittedGK13  |
| CT-OS-P-O2        | 0.141        | 170.368       | -3                        | fittedGK13  |
| CT-OS-P-O2        | 0.032        | 101.83        | 4                         | fittedGK13  |



Table 39: Partial charges assigned to doubly negative Phosphoserine (SEP)

| ATOM NAME | ATOM TYPE | PARTIAL CHARGE |
|-----------|-----------|----------------|
| N         | N         | -0.46664       |
| H         | H         | 0.2967         |
| CA        | CT        | 0.031998       |
| CB        | CT        | 0.150957       |
| OG        | OS        | -0.48887       |
| P         | P         | 1.159923       |
| O1P       | O2        | -0.86142       |
| O2P       | O2        | -0.86142       |
| O3P       | O2        | -0.86142       |
| HB2       | H1        | 0.009656       |
| HB3       | H1        | 0.009656       |
| HA        | H1        | 0.036275       |
| C         | C         | 0.440306       |
| O         | O         | -0.59571       |

Table 40: New parameters assigned to doubly negative Phosphoserine (SEP)

| BOND              |              |               |                           |             |
|-------------------|--------------|---------------|---------------------------|-------------|
| <i>Atom Types</i> | $K_r$        | $r_{eq}$      | <i>Note</i>               |             |
| OS - P            | 525          | 1.61          | Adapted from <sup>1</sup> |             |
| ANGLE             |              |               |                           |             |
| <i>Atom Types</i> | $K_{\Theta}$ | $\Theta_{eq}$ | <i>Note</i>               |             |
| CT - OS - P       | 100          | 120.5         | Adapted from <sup>1</sup> |             |
| TORSION           |              |               |                           |             |
| <i>Atom Types</i> | $V_n/2$      | $\gamma$      | $n$                       | <i>Note</i> |
| CT-OS-P-O2        | 0.623        | -63.53        | -1                        | fittedGK13  |
| CT-OS-P-O2        | 0.213        | -145.686      | -2                        | fittedGK13  |
| CT-OS-P-O2        | 2.246        | -56.664       | -3                        | fittedGK13  |
| CT-OS-P-O2        | 0.176        | 148.989       | -4                        | fittedGK13  |
| CT-OS-P-O2        | 0.051        | 30.301        | -5                        | fittedGK13  |
| CT-OS-P-O2        | 0.188        | -137.385      | 6                         | fittedGK13  |

### 1.4.8 Threonine Modifications

Table 41: Partial charges assigned to neutral Phosphothreonine (TON)

| ATOM NAME | ATOM TYPE | PARTIAL CHARGE |
|-----------|-----------|----------------|
| N         | N         | -0.35837       |
| H         | H         | 0.280143       |
| CA        | CT        | -0.06651       |
| CB        | CT        | 0.045716       |
| OG1       | OS        | -0.33801       |
| P         | P         | 0.957556       |
| O1P       | OH        | -0.54678       |
| HOP2      | HO        | 0.442186       |
| O2P       | OH        | -0.54678       |
| HOP3      | HO        | 0.442186       |
| O3P       | O2        | -0.65038       |
| CG2       | CT        | -0.26498       |
| HG21      | HC        | 0.099671       |
| HG22      | HC        | 0.099671       |
| HG23      | HC        | 0.099671       |
| HB        | H1        | 0.130699       |
| HA        | H1        | 0.142079       |
| C         | C         | 0.600977       |
| O         | O         | -0.56874       |

Table 42: New parameters assigned to neutral Phosphothreonine (TON)

| <b>BOND</b>       |              |               |                           |
|-------------------|--------------|---------------|---------------------------|
| <i>Atom Types</i> | $K_r$        | $r_{eq}$      | <i>Note</i>               |
| P - OH            | 525          | 1.61          | Adapted from <sup>1</sup> |
| P - OS            | 525          | 1.61          | Adapted from <sup>1</sup> |
| <b>ANGLE</b>      |              |               |                           |
| <i>Atom Types</i> | $K_{\Theta}$ | $\Theta_{eq}$ | <i>Note</i>               |
| OH - P - OH       | 140          | 108.23        | Adapted from <sup>1</sup> |
| CT - OS - P       | 100          | 120.5         | Adapted from <sup>1</sup> |
| O2 - P - OH       | 140          | 108.23        | Adapted from <sup>1</sup> |
| HO - OH - P       | 140          | 108.5         | Adapted from <sup>1</sup> |

Table 43: Partial charges assigned to doubly negative Phosphothreonine (TPO)

| ATOM NAME | ATOM TYPE | PARTIAL CHARGE |
|-----------|-----------|----------------|
| N         | N         | -0.55078       |
| H         | H         | 0.344635       |
| CA        | CT        | -0.06056       |
| CB        | CT        | 0.36394        |
| OG1       | OS        | -0.52192       |
| P         | P         | 1.21988        |
| O1P       | O2        | -0.88414       |
| O2P       | O2        | -0.88414       |
| O3P       | O2        | -0.88414       |
| CG2       | CT        | -0.48488       |
| HG21      | HC        | 0.106285       |
| HG22      | HC        | 0.106285       |
| HG23      | HC        | 0.106285       |
| HB        | H1        | 0.049717       |
| HA        | H1        | 0.075833       |
| C         | C         | 0.529578       |
| O         | O         | -0.63189       |

Table 44: New parameters assigned to doubly negative Phosphothreonine (TPO)

| BOND              |              |               |                           |             |
|-------------------|--------------|---------------|---------------------------|-------------|
| <i>Atom Types</i> | $K_r$        | $r_{eq}$      | <i>Note</i>               |             |
| P - OS            | 525          | 1.61          | Adapted from <sup>1</sup> |             |
| ANGLE             |              |               |                           |             |
| <i>Atom Types</i> | $K_{\Theta}$ | $\Theta_{eq}$ | <i>Note</i>               |             |
| CT - OS - P       | 100          | 120.5         | Adapted from <sup>1</sup> |             |
| TORSION           |              |               |                           |             |
| <i>Atom Types</i> | $V_n/2$      | $\gamma$      | $n$                       | <i>Note</i> |
| CT-OS-P-O2        | 0.623        | -63.53        | -1                        | fittedGK13  |
| CT-OS-P-O2        | 0.213        | -145.686      | -2                        | fittedGK13  |
| CT-OS-P-O2        | 2.246        | -56.664       | -3                        | fittedGK13  |
| CT-OS-P-O2        | 0.176        | 148.989       | -4                        | fittedGK13  |
| CT-OS-P-O2        | 0.051        | 30.301        | -5                        | fittedGK13  |
| CT-OS-P-O2        | 0.188        | -137.385      | 6                         | fittedGK13  |

### 1.4.9 Tryptophan Modifications

Table 45: Partial charges assigned to 7-hydroxytryptophan (0AF)

| ATOM NAME | ATOM TYPE | PARTIAL CHARGE |
|-----------|-----------|----------------|
| N         | N         | -0.36882       |
| H         | H         | 0.271475       |
| CA        | CT        | -0.05267       |
| CB        | CT        | -0.22614       |
| CG        | C*        | -0.01307       |
| CD2       | CB        | 0.005485       |
| CE2       | CN        | 0.210593       |
| NE1       | NA        | -0.35741       |
| CD1       | CW        | -0.18754       |
| HD1       | H4        | 0.204222       |
| HE1       | H         | 0.370713       |
| CZ2       | CA        | 0.179687       |
| CH2       | CA        | -0.2855        |
| CZ3       | CA        | -0.18205       |
| CE3       | CA        | -0.28357       |
| HE3       | HA        | 0.170303       |
| HZ3       | HA        | 0.155944       |
| HH2       | HA        | 0.158382       |
| OH2       | OH        | -0.56907       |
| HH1       | HO        | 0.448296       |
| HB2       | HC        | 0.110235       |
| HB3       | HC        | 0.110235       |
| HA        | H1        | 0.096844       |
| C         | C         | 0.603467       |
| O         | O         | -0.57004       |

Table 46: New parameters assigned to 7-hydroxytryptophan (0AF)

| ANGLE       |              |               |                  |          |
|-------------|--------------|---------------|------------------|----------|
| Atom Types  | $K_{\Theta}$ | $\Theta_{eq}$ | Note             |          |
| CN-CA-OH    | 71.64        | 122.07        | same as c2-c2-oh |          |
| TORSION     |              |               |                  |          |
| Atom Types  | $V_n/2$      | $\gamma$      | $n$              | Note     |
| CN-CA-OH-HO | 0.958        | 176.09        | -1               | fittedGK |
| CN-CA-OH-HO | 0.824        | 178.125       | -2               | fittedGK |
| CN-CA-OH-HO | 0.176        | 1.23795       | 3                | fittedGK |



Table 47: Partial charges assigned to 5-hydroxytryptophan (HTR)

| ATOM NAME | ATOM TYPE | PARTIAL CHARGE |
|-----------|-----------|----------------|
| N         | N         | -0.37972       |
| H         | H         | 0.256809       |
| CA        | CT        | 0.007369       |
| CB        | CT        | -0.36861       |
| CG        | C*        | -0.02678       |
| CD2       | CB        | 0.017597       |
| CE2       | CN        | 0.201751       |
| NE1       | NA        | -0.40105       |
| CD1       | CW        | -0.13154       |
| HD11      | H4        | 0.179129       |
| HE11      | H         | 0.369152       |
| CZ2       | CA        | -0.28376       |
| CH2       | CA        | -0.24059       |
| CZ3       | CA        | 0.220602       |
| OH        | OH        | -0.57021       |
| HOH1      | HO        | 0.435498       |
| CE3       | CA        | -0.21633       |
| HE31      | HA        | 0.17718        |
| HH21      | HA        | 0.152957       |
| HZ21      | HA        | 0.176569       |
| HB1       | HC        | 0.14975        |
| HB2       | HC        | 0.14975        |
| HA        | H1        | 0.090597       |
| C         | C         | 0.613083       |
| O         | O         | -0.57921       |

#### 1.4.10 Tyrosine Modifications

Table 48: Partial charges assigned to neutral Phosphotyrosine (PTN)

| ATOM NAME | ATOM TYPE | PARTIAL CHARGE |
|-----------|-----------|----------------|
| N         | N         | -0.3583        |
| H         | H         | 0.250246       |
| CA        | CT        | -0.03242       |
| CB        | CT        | -0.18335       |
| CG        | CA        | 0.097257       |
| CD1       | CA        | -0.17109       |
| CE1       | CA        | -0.2109        |
| CZ        | CA        | 0.229335       |
| OH        | OS        | -0.28548       |
| P         | P         | 0.981548       |
| O3P       | OH        | -0.55986       |
| HO3P      | HO        | 0.44556        |
| O2P       | OH        | -0.55986       |
| HO2P      | HO        | 0.44556        |
| O1P       | O2        | -0.66117       |
| CE2       | CA        | -0.2109        |
| CD2       | CA        | -0.17109       |
| HD2       | HA        | 0.142798       |
| HE2       | HA        | 0.174748       |
| HE1       | HA        | 0.174748       |
| HD1       | HA        | 0.142798       |
| HB2       | HC        | 0.088647       |
| HB3       | HC        | 0.088647       |
| HA        | H1        | 0.084605       |
| C         | C         | 0.634319       |
| O         | O         | -0.57638       |

Table 49: New parameters assigned to neutral Phosphotyrosine (PTN)

| BOND              |              |               |                           |                    |
|-------------------|--------------|---------------|---------------------------|--------------------|
| <i>Atom Types</i> | $K_r$        | $r_{eq}$      | <i>Note</i>               |                    |
| CA-OS             | 392.6        | 1.357         | same as c2-os             |                    |
| OS-P              | 525          | 1.61          | Adapted from <sup>1</sup> |                    |
| OH-P              | 525          | 1.61          | Adapted from <sup>1</sup> |                    |
| ANGLE             |              |               |                           |                    |
| <i>Atom Types</i> | $K_{\Theta}$ | $\Theta_{eq}$ | <i>Note</i>               |                    |
| CA-OS-P           | 100          | 120.5         | Adapted from <sup>1</sup> |                    |
| OS-P -OH          | 140          | 108.23        | Adapted from <sup>1</sup> |                    |
| OS-P -O2          | 140          | 108.23        | Adapted from <sup>1</sup> |                    |
| OH-P -O2          | 140          | 108.23        | Adapted from <sup>1</sup> |                    |
| OH-P -OH          | 140          | 108.23        | Adapted from <sup>1</sup> |                    |
| CA-CA-OS          | 71.04        | 121.89        | same as c2-c2-os          |                    |
| TORSION           |              |               |                           |                    |
| <i>Atom Types</i> | $V_n/2$      | $\gamma$      | $n$                       | <i>Note</i>        |
| CA-CA-OS-P        | 1.05         | 180           | 2                         | same as X -c2-os-X |
| CA-OS-P-O2        | 1.1295       | 10.51         | -1                        | fitted,GK          |
| CA-OS-P-O2        | 0.2271       | -15.788       | -2                        | fitted,GK          |
| CA-OS-P-O2        | 0.5013       | -93.029       | -3                        | fitted,GK          |
| CA-OS-P-O2        | 0.2058       | 157.172       | 4                         | fitted,GK          |

Table 50: Partial charges assigned to doubly negative Phosphotyrosine (PTR)

| ATOM NAME | ATOM TYPE | PARTIAL CHARGE |
|-----------|-----------|----------------|
| N         | N         | -0.32312       |
| H         | H         | 0.24754        |
| CA        | CT        | -0.0162        |
| CB        | CT        | -0.25366       |
| CG        | CA        | -0.01881       |
| CD1       | CA        | -0.19149       |
| CE1       | CA        | -0.29064       |
| CZ        | CA        | 0.33299        |
| OH        | OS        | -0.49686       |
| P         | P         | 1.204          |
| O1P       | O2        | -0.84601       |
| O2P       | O2        | -0.84601       |
| O3P       | O2        | -0.84601       |
| CE2       | CA        | -0.29064       |
| CD2       | CA        | -0.19149       |
| HD21      | HA        | 0.12754        |
| HE21      | HA        | 0.16778        |
| HE11      | HA        | 0.16778        |
| HD11      | HA        | 0.12754        |
| HB1       | HC        | 0.09489        |
| HB2       | HC        | 0.09489        |
| HA        | H1        | 0.07288        |
| C         | C         | 0.68708        |
| O         | O         | -0.71402       |

Table 51: New parameters assigned to doubly negative Phosphotyrosine (PTR)

| BOND              |              |               |                           |                    |
|-------------------|--------------|---------------|---------------------------|--------------------|
| <i>Atom Types</i> | $K_r$        | $r_{eq}$      | <i>Note</i>               |                    |
| CA-OS             | 392.6        | 1.357         | same as c2-os             |                    |
| OS-P              | 525          | 1.61          | Adapted from <sup>1</sup> |                    |
| ANGLE             |              |               |                           |                    |
| <i>Atom Types</i> | $K_{\Theta}$ | $\Theta_{eq}$ | <i>Note</i>               |                    |
| CA-OS-P           | 100          | 120.5         | Adapted from <sup>1</sup> |                    |
| OS-P -O2          | 140          | 108.23        | Adapted from <sup>1</sup> |                    |
| CA-CA-OS          | 71.04        | 121.89        | same as c2-c2-os          |                    |
| TORSION           |              |               |                           |                    |
| <i>Atom Types</i> | $V_n/2$      | $\gamma$      | $n$                       | <i>Note</i>        |
| CA-CA-OS-P        | 1.05         | 180           | 2                         | same as X -c2-os-X |
| CA-OS-P-O2        | 0.4659       | 179.937       | -1                        | fitted,GK13        |
| CA-OS-P-O2        | 0.30383      | 121.386       | -2                        | fitted,GK13        |
| CA-OS-P-O2        | 0.6954       | -18.001       | -3                        | fitted,GK13        |
| CA-OS-P-O2        | 0.1536       | -32.4026      | 4                         | fitted,GK13        |

## 2 Supplementary Methods

### 2.1 Automated Curation of Pairs of Modified and Unmodified Protein Structures Contained in the PDB

It was necessary to establish a baseline of the background levels of secondary and tertiary structure dissimilarity as a result of post-translational modifications. Thus, a set of pairs of modified and unmodified experimental structures against which to test the parameters of the modified amino acids was needed. To establish this, all pairs of modified and unmodified structures had to be enumerated. According to the PSI-MOD protein modification browser previously available on the beta-staging webpage of the PDB, as of April 2012, 26,823 instances of modified amino acids were found. Some instances may be redundant across multiple modification types occurring on a single structure. To the best of our knowledge, this webpage is unfortunately not available anymore. From this set, 15,573 PDB structures contained disulfide bridges. The IDs containing disulfide bridges were subtracted from the global list. From this remaining set of structures, a Python script was written to go through each PDB ID containing one or more modifications and tabulate information contained in the lines denoted by *MODRES* in each structure.

A Python script was written to take as input all PDB structures with a single modification on them that is not a disulfide bridge. This initial set of structures at the time of the search contained 2136 PDB IDs. The script searches through each HTML page and stores the title, authors, number of chains, the number of modifications, and any related entries to the PDB. Then, for each related entry, the script automatically opens the related PDB's HTML form and searches through and populates the number of modifications, title, and author information; if the authors are the same, the title is  $> 50\%$  similar, and there is one less modification than in the reference structure, then adds it to the candidate list of pairs found. The logical conditions were

converged upon through trial and error, eliminating as many false positives as possible while making sure true positives were always found. The initial list contained 170 pairs.

Upon populating the master list, each pair was manually confirmed to remove any spurious pairs caused by pairs of structures with a complex with a modified protein (for example, a methylated histone) and not in complex with the histone region, which were false positives. Similarly, false positives corresponding to sequences that had mutations other than the post-translational modification on the structure were removed. The final list of pairs after curating the entire database contained 40 pairs of structures. The approach was extended to find all pairs of multiply modified structures and their corresponding unmodified counterparts.

It is important to note that in the PDB there are structures that have been chemically modified post-translationally to enhance crystallizability. One such example is the dimethylation of surface exposed lysines. These are chemical modifications to the structure of the protein that also would yield a hit for a post-translational modification by name, albeit the modification may not have been done by an enzyme, but chemically by a method such as reductive methylation. Nevertheless, the protein structures are chemically modified in a way that produces the same side-chain modification as might be achieved by an enzyme; thus, these structures were included in analysis.

## **2.2 Structural Characterization of Baseline Secondary Structure and Tertiary Structure Features to Establish Background Control Levels**

Each modified and unmodified structure was next assessed for local secondary structure for which to serve as the control to compare torsion angle distributions during simulation. It was observed that there was sometimes disagreement between STRIDE,<sup>2</sup> DSSP,<sup>3</sup> and the author's secondary structure assignment. Therefore, for each modified/unmodified pair, the consensus

of the three assignments was taken to assign the initial secondary structure. Next, each modified structure was aligned to its unmodified counterpart using the align command in PyMol<sup>4</sup> to calculate the  $C_{\alpha}$  root-mean squared deviation (RMSD) between the structures. A cutoff of 100Å was used to ensure that no atoms were rejected during the RMSD calculation. We also populated information on whether it was known if the modification was the cause of the structural change based on literature search. This was done to establish the background level of structural dissimilarity between the modified and unmodified structures. Using functions available in the BioPython set of programs,<sup>5</sup> we constructed contact maps for each modified/unmodified pair to visually represent the interactions of every pair of amino acids  $i$  and  $j$  on the sequences. Contacts were calculated for residues that had a sequence distance of 5 or more apart.

### 2.3 Homology Modeling Missing Residues in Pairs of Modified/Unmodified Proteins Curated

It was observed that among the pairs of modified/unmodified structures, there existed structures with missing residues. For each structure with missing residues, the original PDB file was used as a template in SwissModel<sup>6-8</sup> to create a homology model for the purpose of generating initial coordinates of the missing residues. This approach generated a structure for the full length of the sequence contained in the PDB and removed any missing residues. This was done as simulation artifacts were observed in the energetics when performing simulations with the residues missing. Then, the structures with the missing residues filled in were aligned in PyMol to the original PDB structures and the  $C_{\alpha}$  atom coordinates were extracted from the homology model and added to the PDB structure. When **tleap** was called subsequently to prepare these structures for all-atom molecular dynamics simulations, it filled in the missing atoms according to the AMBER ff03 forcefield. In Figure 1, an example is presented of the structure before and



after the homology model was built for the purpose of filling in the missing residues. For the structures simulated, no missing residues corresponded to a position containing a PTM.

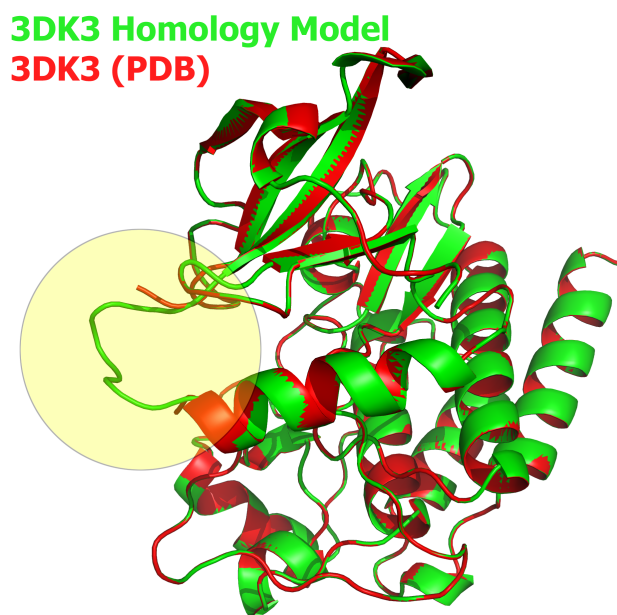

Figure 1: Comparison of PDB-deposited coordinates with missing residues and the homology model generated with the missing residues filled in based on the PDB-deposited structure using SwissModel. The coordinates from the PDB structure were preserved and only missing  $C_{\alpha}$  atoms were filled in.

### 3 Derivation of Restrained Electrostatic Potential

As described by Bayly, Kollman, and coworkers,<sup>9</sup> to fit partial charges to atoms, first the quantum mechanically calculated electrostatic potential (ESP) must be determined for each point  $i$  in a grid in the solvent-accessible region of a molecule but beyond the vdw radius. The derivation follows the work of Bayly et al. for completion.<sup>9</sup> Charges  $q_j$  are fit to every atom center  $j$  by a least squares fitting procedure.

The ESP calculated in molecular mechanics following Bayly, Kollman, and coworkers<sup>9</sup> is

$$\tilde{V}_{el}(r_i) = \sum_{j=1}^{N_{atoms}} \frac{q_j}{r_{ij}} \quad (1)$$

where  $r_{ij}$  is the distance between grid point  $i$  to atom center  $j$ . The classically calculated ESP is denoted as  $\tilde{V}_{el}(r_i)$  and the QM calculated ESP are function evaluations in Gaussian09<sup>10</sup> as described in the methods and is denoted as  $V_{el}(r_i)$ . The objective function to be minimized is

$$\chi_{esp}^2 = \sum_{i=1}^M \left( V_{el}(r_i) - \tilde{V}_{el}(r_i) \right)^2 \quad (2)$$

where  $M$  is the total number of grid points. To fit the charges to the points, the objective is to minimize this function. Since the objective function is convex, the minimum will be the global minimum. The minimum is obtained where

$$\frac{\partial \chi_{esp}^2}{\partial q_j} = -2 \sum_i^M \frac{V_{el}(r_i) - \tilde{V}_{el}(r_i)}{r_{ij}} = 0 \quad \forall j. \quad (3)$$

This can be solved using a system of equations in matrix form, with the constraint that the sum

of all charges equals the total molecular charge

$$\sum_j^{N_{atoms}} q_j = q_{total}. \quad (4)$$

RESP introduces restraints in the form of a penalty function into the fitting process.<sup>9</sup> To utilize the RESP charge-fitting method, a penalty function must be added to  $\chi_{esp}^2$ , making the objective function to be minimized

$$\chi^2 = \chi_{esp}^2 + \chi_{rstr}^2 \quad (5)$$

with a minimum at

$$\frac{\partial \chi^2}{\partial q_j} = \frac{\partial \chi_{esp}^2}{\partial q_j} + \frac{\partial \chi_{rstr}^2}{\partial q_j} = 0 \quad \forall j. \quad (6)$$

The penalty function is a hyperbolic function with form

$$\chi_{rstr}^2 = a \sum_j^{N_{atoms}} \left( (q_j^2 + b^2)^{1/2} - b \right) \quad (7)$$

where scale factor  $a$  denotes the asymptotic limit of the strength of the restraint, and  $b$  is the “tightness” of the hyperbola around the minimum.<sup>9</sup> The derivative of the second term in Equation 7 becomes

$$\frac{\partial \chi_{rstr}^2}{\partial q_j} = a q_j (q_j^2 + b^2)^{-1/2}. \quad (8)$$

Solving for the set of  $q_j$  after simplification becomes the solution of the matrix equation<sup>11</sup>

$$\mathbf{Aq} = \mathbf{B} \quad (9)$$

with the off-diagonal ESP-dependent elements

$$A_{jk} = \sum_{i=1}^M \frac{1}{r_{ij}r_{ik}} \quad , \quad (10)$$

the diagonal ESP-dependent elements

$$A_{jj} = \sum_{i=1}^M \frac{1}{r_{ij}^2} + \frac{\partial \chi_{rstr}^2}{dq_j} \quad , \quad (11)$$

and finally the ESP-dependent elements of  $\mathbf{B}^9$

$$B_j = \sum_{i=1}^M \frac{V_i}{r_{ij}^2} \quad . \quad (12)$$

## 4 Supplementary Results

### 4.1 Energetic and structural statistics collected over the course of 5ns all-atom MD simulations for 17 pairs of modified/unmodified structures

Each modified and unmodified structure in the PDB that underwent MD simulation was first minimized to the nearest local minimum. A comparison of the structural deviation resulting from the unrestrained local minimization is shown in Table 52. The average  $C_{\alpha}$  RMSDs of the minimized structures to their PDB modified/unmodified counterparts were tabulated. The results show virtually identical deviation for the modified and unmodified structures. Namely, the average  $C_{\alpha}$  RMSD of the minimized modified structures to their PDB counterparts was  $0.42 \pm 0.15$  Å, whereas for their analogous unmodified counterparts, this value was  $0.43 \pm 0.19$  Å.

Table 52: Comparison of deviations caused by unrestrained local minimizations of starting structure to nearest local minimum.

| <i>Modified PDB</i> | <i>Unmodified PDB</i> | <i>Modification Type</i> | <i><math>C_{\alpha}</math> RMSD of Start to<br/>Minimized Modified<br/>Structure</i> | <i><math>C_{\alpha}</math> RMSD of Start to<br/>Minimized Unmodified<br/>Structure</i> |
|---------------------|-----------------------|--------------------------|--------------------------------------------------------------------------------------|----------------------------------------------------------------------------------------|
| 2IVT                | 2IVS                  | PHOSPHOTYROSINE          | 0.40                                                                                 | 0.42                                                                                   |
| 3DK6                | 3DK3                  | PHOSPHOTYROSINE          | 0.18                                                                                 | 0.22                                                                                   |
| 1U54                | 1U46                  | PHOSPHOTYROSINE          | 0.50                                                                                 | 0.35                                                                                   |
| 1D4W                | 1D4T                  | PHOSPHOTYROSINE          | 0.22                                                                                 | 0.47                                                                                   |
| 2XKK                | 2XKJ                  | PHOSPHOTYROSINE          | 0.41                                                                                 | 0.28                                                                                   |
| 2JFM                | 2J51                  | PHOSPHOTHREONINE         | 0.35                                                                                 | 0.22                                                                                   |
| 3D5W                | 3D5U                  | PHOSPHOTHREONINE         | 0.43                                                                                 | 0.33                                                                                   |
| 3CKX                | 3CKW                  | PHOSPHOTHREONINE         | 0.39                                                                                 | 0.45                                                                                   |
| 1V50                | 1V4Z                  | PHOSPHOTHREONINE         | 0.55                                                                                 | 0.37                                                                                   |
| 2L5J                | 2L5I                  | PHOSPHOSERINE            | 0.74                                                                                 | 0.84                                                                                   |
| 3NAY                | 3NAX                  | PHOSPHOSERINE            | 0.23                                                                                 | 0.32                                                                                   |
| 1KKM                | 1KKL                  | PHOSPHOSERINE            | 0.44                                                                                 | 0.41                                                                                   |

Continued on next page

Table 52 – continued from previous page

| <i>Modified PDB</i> | <i>Unmodified PDB</i> | <i>Modification Type</i> | <i>C<sub>α</sub> RMSD of Start to<br/>Minimized Modified<br/>Structure</i> | <i>C<sub>α</sub> RMSD of Start to<br/>Minimized Unmodified<br/>Structure</i> |
|---------------------|-----------------------|--------------------------|----------------------------------------------------------------------------|------------------------------------------------------------------------------|
| 3IAF                | 3IAE                  | PHOSPHOSERINE            | 0.31                                                                       | 0.28                                                                         |
| 1H4X                | 1H4Y                  | PHOSPHOSERINE            | 0.26                                                                       | 0.31                                                                         |
| 3F9X                | 3F9W                  | N-DIMETHYL-LYSINE        | 0.52                                                                       | 0.71                                                                         |
| 3S7D                | 3S7F                  | N-METHYL-LYSINE          | 0.53                                                                       | 0.53                                                                         |
| 2KWJ                | 2KWK                  | N(6)-ACETYLLYSINE        | 0.63                                                                       | 0.82                                                                         |
| <b>Total</b>        | <b>17 Pairs</b>       |                          | <b>0.42 ± 0.15</b>                                                         | <b>0.43 ± 0.19</b>                                                           |

Table 53 presents all raw simulation data as presented in the main text.

Table 53: Energetic and structural statistics collected over the course of 5ns all-atom MD simulations for 17 pairs of modified/unmodified structures. Mean values are given for each metric  $\pm$  one standard deviation.

| <i>Modified<br/>PDB</i> | <i>Mean C<sub>α</sub></i>               |                                        |                                       | <i>Unmodified<br/>PDB</i> | <i>Mean C<sub>α</sub></i>               |                                        |                                       | <i>Modification Type</i> |
|-------------------------|-----------------------------------------|----------------------------------------|---------------------------------------|---------------------------|-----------------------------------------|----------------------------------------|---------------------------------------|--------------------------|
|                         | <i>Mean Total Energy<br/>(kcal/mol)</i> | <i>RMSD from<br/>Minimized<br/>PDB</i> | <i>Min/Max<br/>C<sub>α</sub> RMSD</i> |                           | <i>Mean Total Energy<br/>(kcal/mol)</i> | <i>RMSD from<br/>Minimized<br/>PDB</i> | <i>Min/Max<br/>C<sub>α</sub> RMSD</i> |                          |
| <i>2IVT</i>             | -1986.29±75.90                          | 4.03±0.32                              | 2.70/4.72                             | <i>2IVS</i>               | -1741.71±70.04                          | 2.55±0.30                              | 1.38/3.75                             | O-PHOSPHOTYROSINE        |
| <i>3DK6</i>             | -1438.27±61.14                          | 4.03±0.50                              | 2.47/5.20                             | <i>3DK3</i>               | -928.45±59.45                           | 3.60±0.58                              | 1.73/4.74                             | O-PHOSPHOTYROSINE        |
| <i>1U54</i>             | -2020.73±67.33                          | 2.15±0.21                              | 1.59/2.95                             | <i>1U46</i>               | -1372.19±65.62                          | 2.67±0.27                              | 1.87/3.34                             | O-PHOSPHOTYROSINE        |
| <i>1D4W</i>             | -345.56±12.85                           | 4.30±0.94                              | 2.20/7.21                             | <i>1D4T</i>               | -110.48±13.98                           | 3.91±0.82                              | 1.89/6.11                             | O-PHOSPHOTYROSINE        |
| <i>2XKK</i>             | -4823.84±90.02                          | 4.37±0.70                              | 2.32/5.89                             | <i>2XKJ</i>               | -4272.45±89.35                          | 4.00±0.25                              | 3.15/4.64                             | O-PHOSPHOTYROSINE        |
| <i>2JFM</i>             | -1855.43±70.59                          | 4.34±0.60                              | 2.78/5.86                             | <i>2J5I</i>               | -1619.59±71.33                          | 4.36±0.68                              | 1.98/5.72                             | PHOSPHOTHREONINE         |
| <i>3D5W</i>             | -1905.28±68.65                          | 4.85±1.57                              | 1.67/7.01                             | <i>3D5U</i>               | -1471.89±70.44                          | 6.55±1.74                              | 1.92/9.10                             | PHOSPHOTHREONINE         |
| <i>3CKX</i>             | -1651.22±70.97                          | 3.84±0.50                              | 1.91/4.89                             | <i>3CKW</i>               | -1306.53±69.55                          | 3.37±0.45                              | 2.20/4.30                             | PHOSPHOTHREONINE         |
| <i>1V50</i>             | -561.89±20.22                           | 4.35±0.65                              | 1.70/5.74                             | <i>1V4Z</i>               | -331.13±16.67                           | 1.98±0.36                              | 0.98/3.70                             | PHOSPHOTHREONINE         |
| <i>2L5J</i>             | -403.68±29.23                           | 4.94* <sup>1</sup> ±0.27               | 3.46/5.61                             | <i>2L5I</i>               | -169.84±18.58                           | 3.79±0.38                              | 2.41/5.38                             | PHOSPHOSERINE            |

Continued on next page

<sup>1</sup>This value is the one from the 66 ns simulation as described in the Supplementary Material.

Table 53 – continued from previous page

| Modified<br>PDB | Mean Total Energy<br>(kcal/mol) | Mean C <sub>α</sub>           |                                | Unmodified<br>PDB | Mean Total Energy<br>(kcal/mol) | Mean C <sub>α</sub>           |                                | Modification Type |
|-----------------|---------------------------------|-------------------------------|--------------------------------|-------------------|---------------------------------|-------------------------------|--------------------------------|-------------------|
|                 |                                 | RMSD from<br>Minimized<br>PDB | Min/Max<br>C <sub>α</sub> RMSD |                   |                                 | RMSD from<br>Minimized<br>PDB | Min/Max<br>C <sub>α</sub> RMSD |                   |
| <i>3NAY</i>     | -1693.05±70.15                  | 2.63±0.38                     | 1.53/3.61                      | <i>3NAX</i>       | -1278.23±67.66                  | 3.38±0.80                     | 1.53/5.00                      | PHOSPHOSERINE     |
| <i>1KKM</i>     | -797.96±35.81                   | 3.59±0.91                     | 0.90/5.19                      | <i>1KKL</i>       | -551.04±35.66                   | 3.71±0.75                     | 1.01/5.40                      | PHOSPHOSERINE     |
| <i>3IAF</i>     | -1479.77±97.19                  | 3.79±0.33                     | 2.32/4.64                      | <i>3IAE</i>       | -995.34±91.96                   | 2.82±0.29                     | 1.94/3.67                      | PHOSPHOSERINE     |
| <i>1H4X</i>     | -1525.55±43.18                  | 2.38±0.36                     | 1.13/3.55                      | <i>1H4Y</i>       | -1242.64±42.68                  | 1.39±0.20                     | 0.88/2.03                      | PHOSPHOSERINE     |
| <i>3F9X</i>     | -311.02±15.57                   | 4.92±1.96                     | 0.74/7.05                      | <i>3F9W</i>       | -331.17±13.17                   | 3.97±0.92                     | 1.59/6.73                      | N-DIMETHYL-LYSINE |
| <i>3S7D</i>     | -21.06±9.67                     | 2.43±0.07                     | 2.02/2.74                      | <i>3S7F</i>       | -35.32±10.07                    | 2.27±0.38                     | 0.46/2.87                      | N-METHYL-LYSINE   |
| <i>2KWJ</i>     | -388.89±19.35                   | 5.77±0.65                     | 3.57/7.99                      | <i>2KWK</i>       | -385.13±18.17                   | 5.80±1.12                     | 2.85/8.47                      | N(6)-ACETYLLYSINE |
| <i>Average</i>  |                                 | 3.92                          |                                |                   |                                 | 3.53                          |                                |                   |
| <b>Total</b>    | <b>34</b>                       |                               |                                |                   |                                 |                               |                                |                   |

## 4.2 Supplementary Discussion on 2L5J/2L5I Deviation in Simulation

The structural deviations in unrestrained simulations of the modified and unmodified structures were in general comparable on the aggregate, with the exception of 2L5J/2L5I. The deviation could be caused by several factors. First, all simulations performed in this study were performed at physiological pH. Thus, the protonation state simulated for the 21 amino acid 2L5J contained a -2 charge. The NMR structure was solved at a weakly acidic pH of 4.0,<sup>12</sup> and thus the protonation state of the structure possessed a -1 charge. The change in charge based on the protonation state may have destabilized the structure. It is possible that the phosphorylated structure may unfold at physiological pH, or may be less stably folded, which may be the reason Page et al.<sup>12</sup> found the phosphorylated structure to aggregate at moderate concentrations whereas the unmodified protein did not. During the simulation, the structure began at 3.48 Å from the native during the production stage. The structure within 1 ns unfolded to a near-extended conforma-

tion, 12 Å from the native which lead to the high average RMSD. It was interestingly observed that in the subsequent portions of the 5 ns simulation, the structure refolded itself within 4.67 Å of the native, which is a considerable gain after such a large initial deviation, without any restraints. The simulation was subsequently repeated identically with a different initial seed and for 66 ns instead of 5 ns, and the structure in the subsequent simulation remained stable and behaved similarly to the simulation of the unmodified structure, with an average  $C_{\alpha}$  RMSD of  $4.94 \pm 0.27$ . At no point during the simulation did it exhibit unfolding and refolding, but rather remained stably folded near the NMR structure throughout. The phosphorylated serine in position 10, with -1 charge on the NMR structure of 2L5J forms a hydrogen bond with the backbone of the preceding arginine residue. In the simulation, where the phosphate group had a -2 charge, when the structure refolded, the same backbone interaction was preserved, but two simultaneous salt bridges were formed with Arg9 and Arg14.

The other phosphorylated structures simulated did not unfold in their physiological protonation state, and since they used the same generalized Born model, it is unlikely a possibility that it is an artifact of the generalized Born model. It is likely performing the simulations with restraints in the heating and equilibration stages prior to production would have lead to lesser deviations from the native, but, since the goal here was to strictly test the forcefields, we did not want to artificially keep them intact and allowed them to naturally sample space. Overall, with the exception of 2L5J, we observed that the parameters did not cause the structures tested to unfold or deviate more than their unmodified counterpart which only uses the parameters derived in ff03.



### **4.3 Plots of Energetics, Secondary Structure, and Tertiary Structure Space Sampled for Pairs of Modified/Unmodified Proteins**

In this section, we supply plots corresponding to several of the parameters described in the paper for each pair of modified/unmodified structures simulated. In each figure, the top, middle, and bottom plots correspond to the same information, with the modified plots on the left, and the unmodified plots on the right. The top plot is a Ramachandran plot corresponding to the residue that becomes modified over the course of the simulation. The color bar represents the percent occupation per surface, which is proportional to the propensity of the torsion angle to be populated in that bin. In most cases, the secondary structure of the modified structure is preserved relative to its initial configuration, as well as its unmodified counterpart. The middle is a graph of Potential Energy vs. Time over the course of the simulation. All simulations were found to be stable. The bottom plots on each page were plots of the time evolution of the  $C_\alpha$  RMSD from the native PDB structure for the modified and unmodified structures. This data is summarized in the main text via a mean and standard deviation. Additionally, several independent longer simulations using the same protocol described previously with a 25 ns production phase were also performed for 3 modified structures. The simulation results exhibited similar results to the short 5 ns simulations. The Ramachandran, potential energy, and time evolution of  $C_\alpha$  RMSD plots as described are next presented as supporting material.

Modified PDB Simulation  
(Left)

Unmodified PDB Simulation  
(Right)

2IVT

2IVS

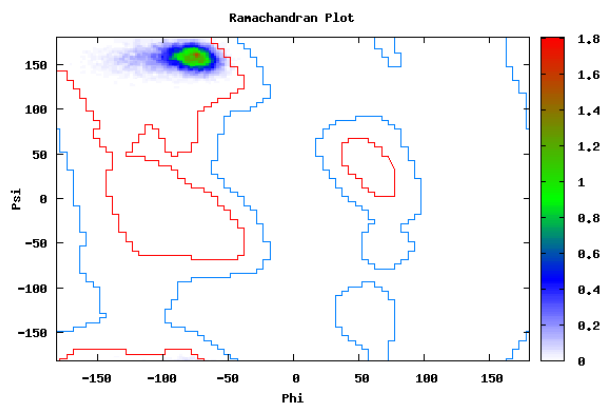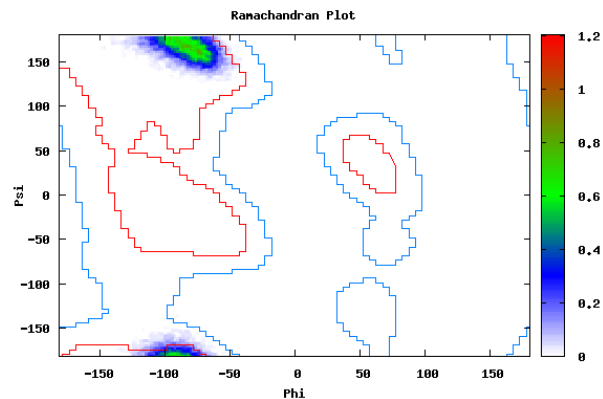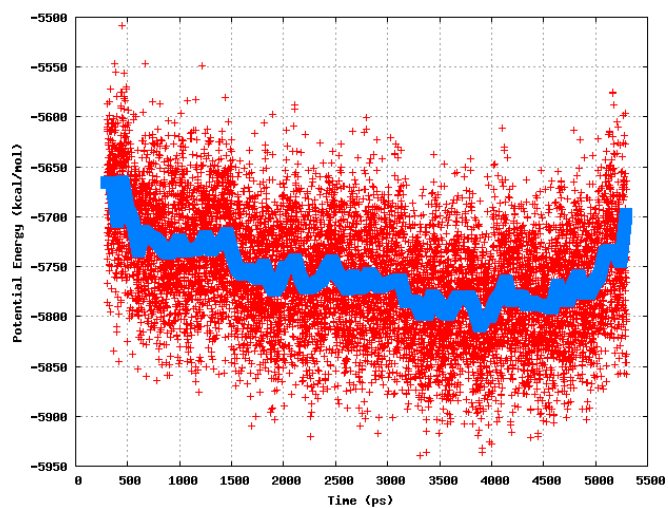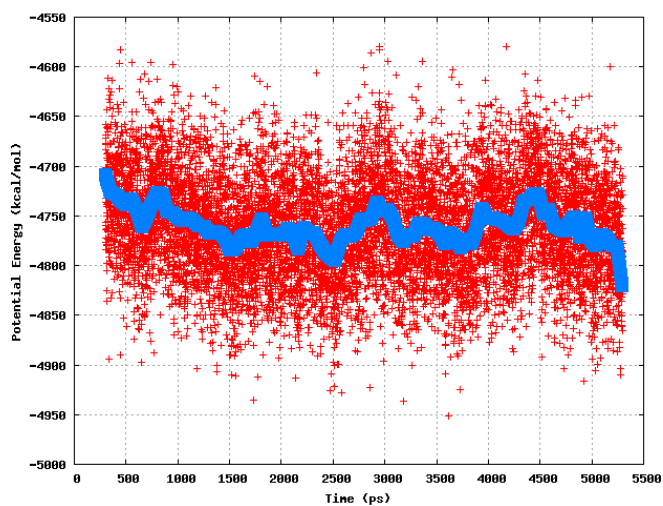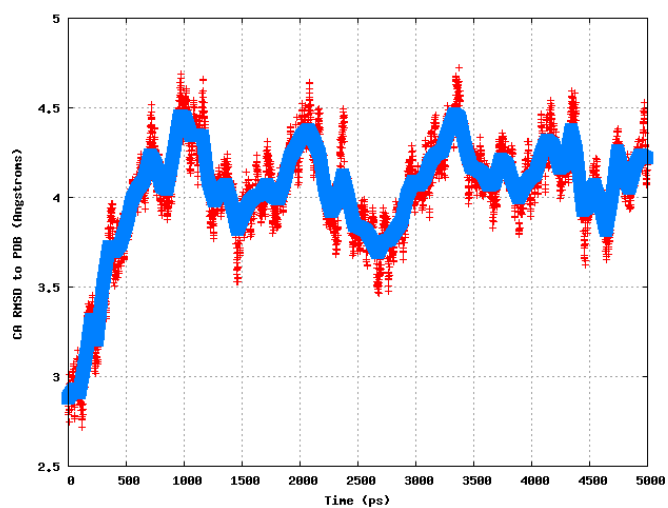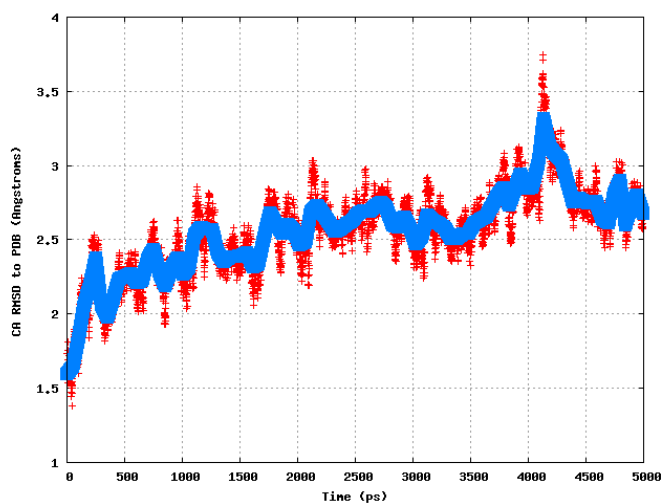

## 3DK6

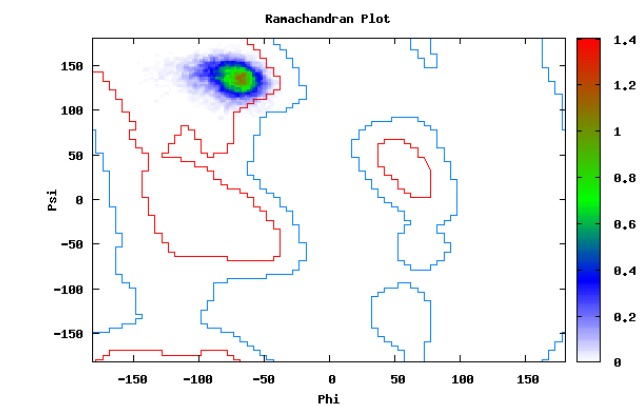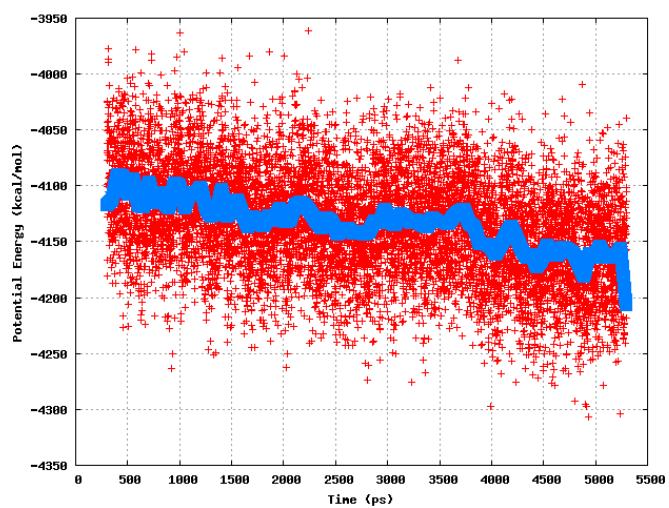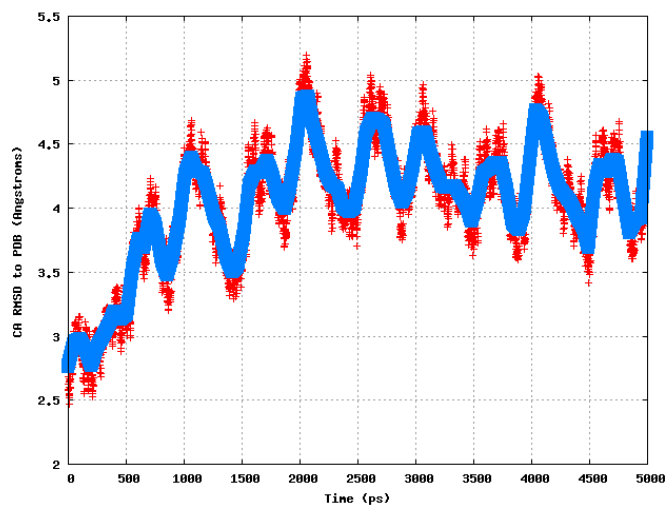

## 3DK3

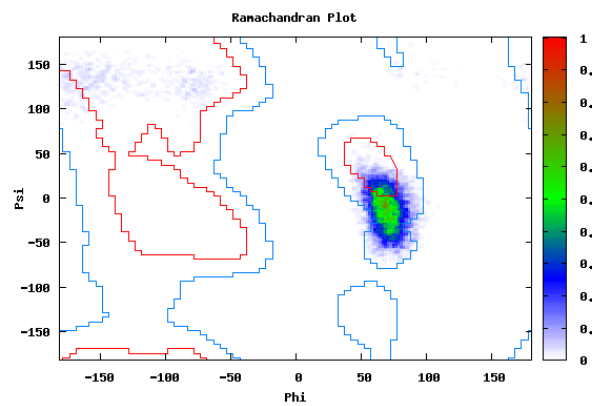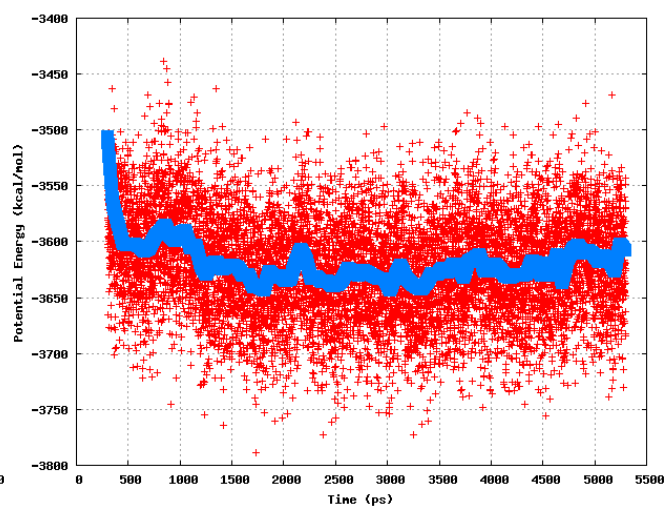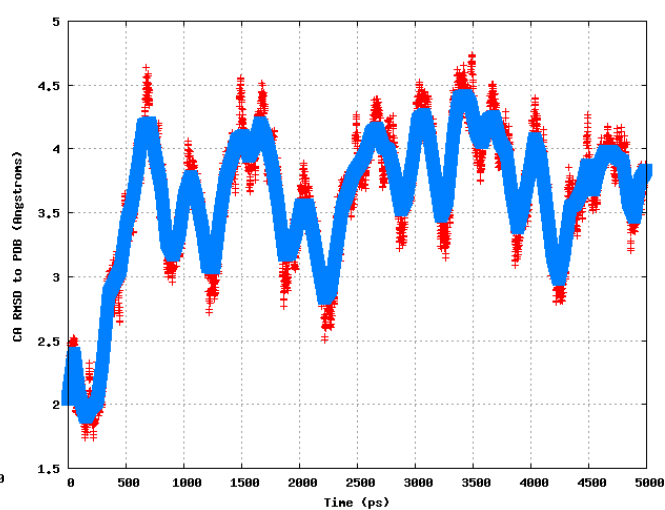

# 1U54

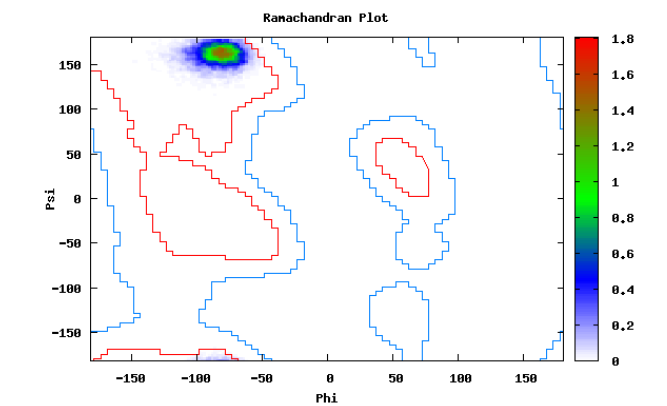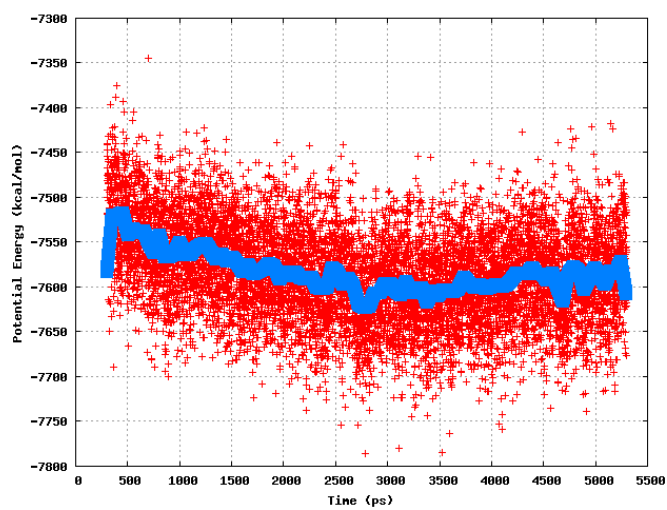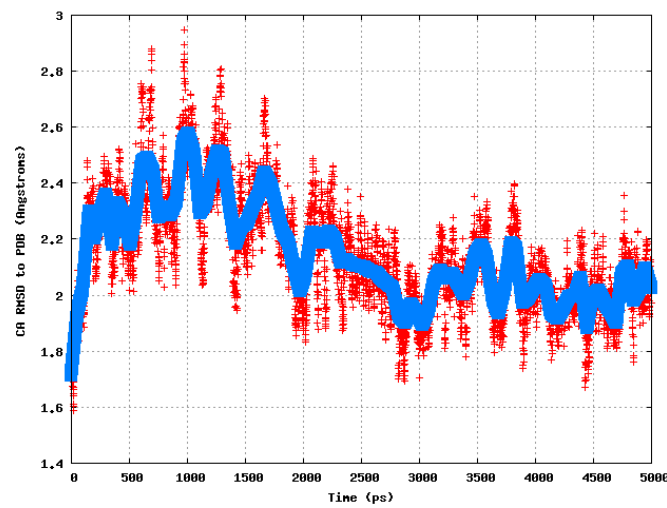

# 1U46

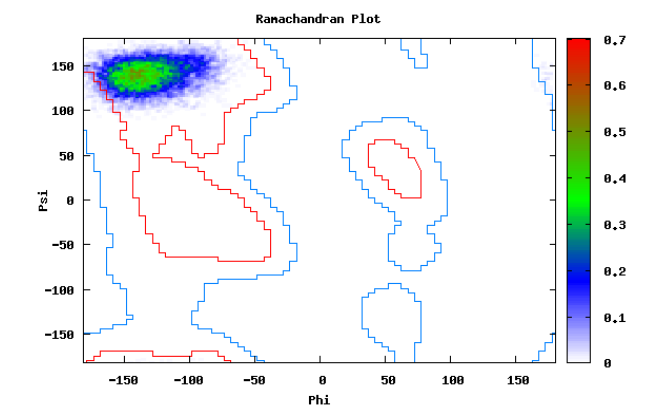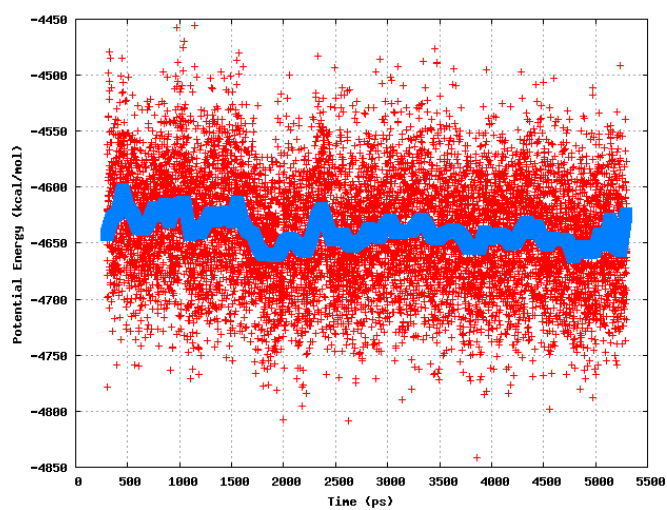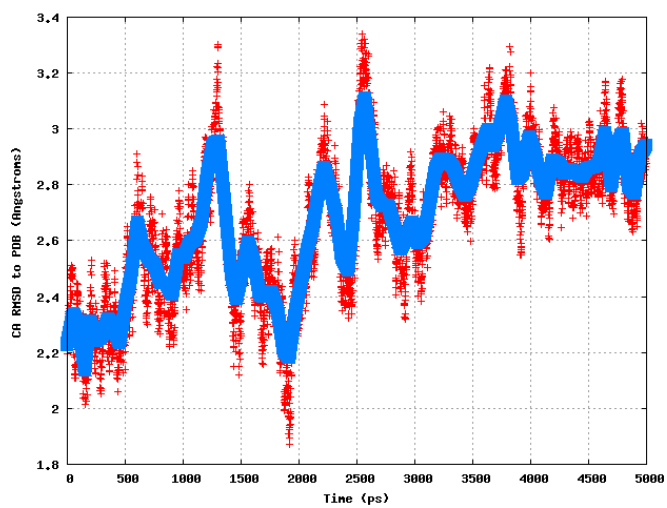

# 1D4W

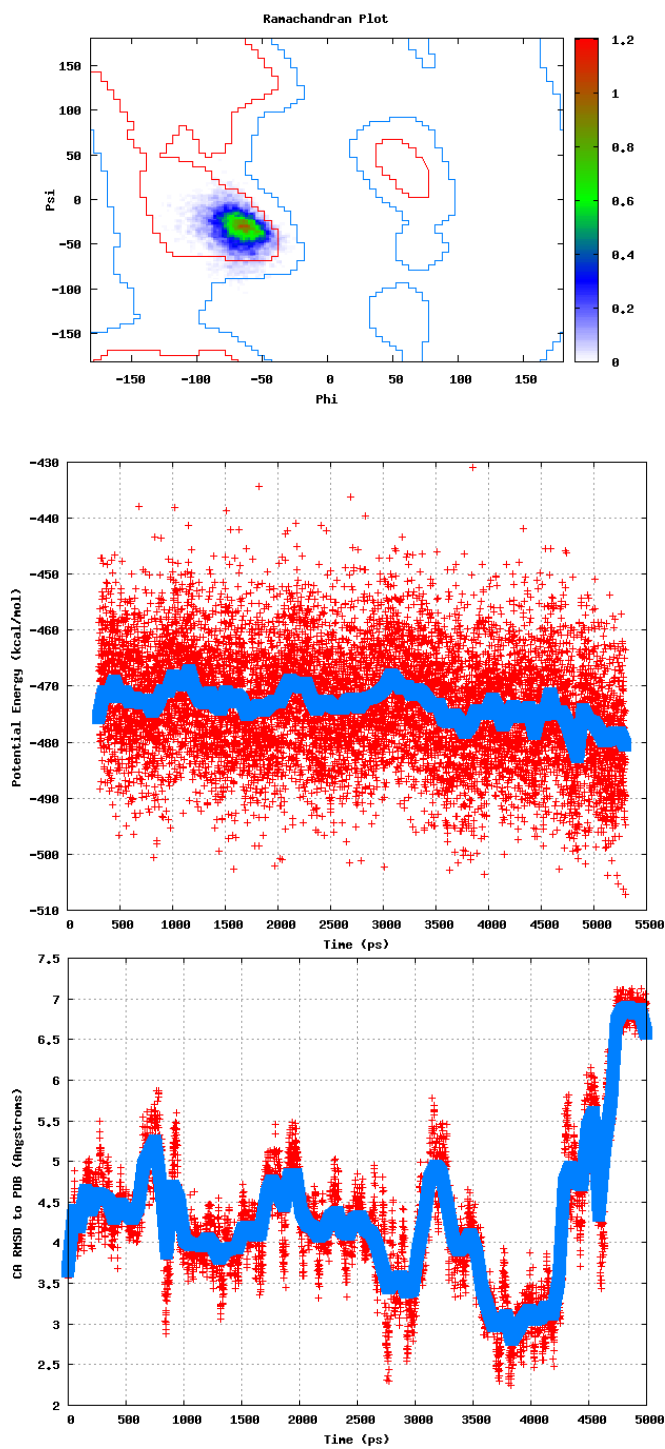

# 1D4T

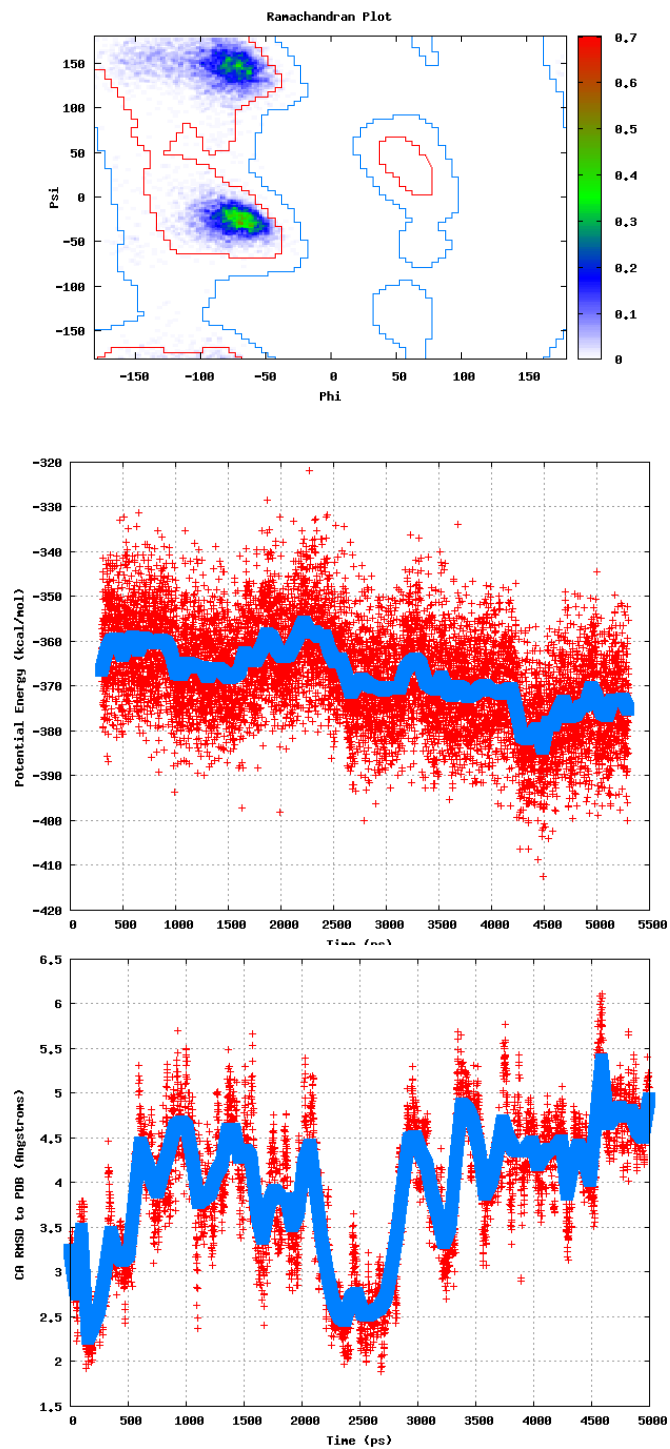

# 2XKK

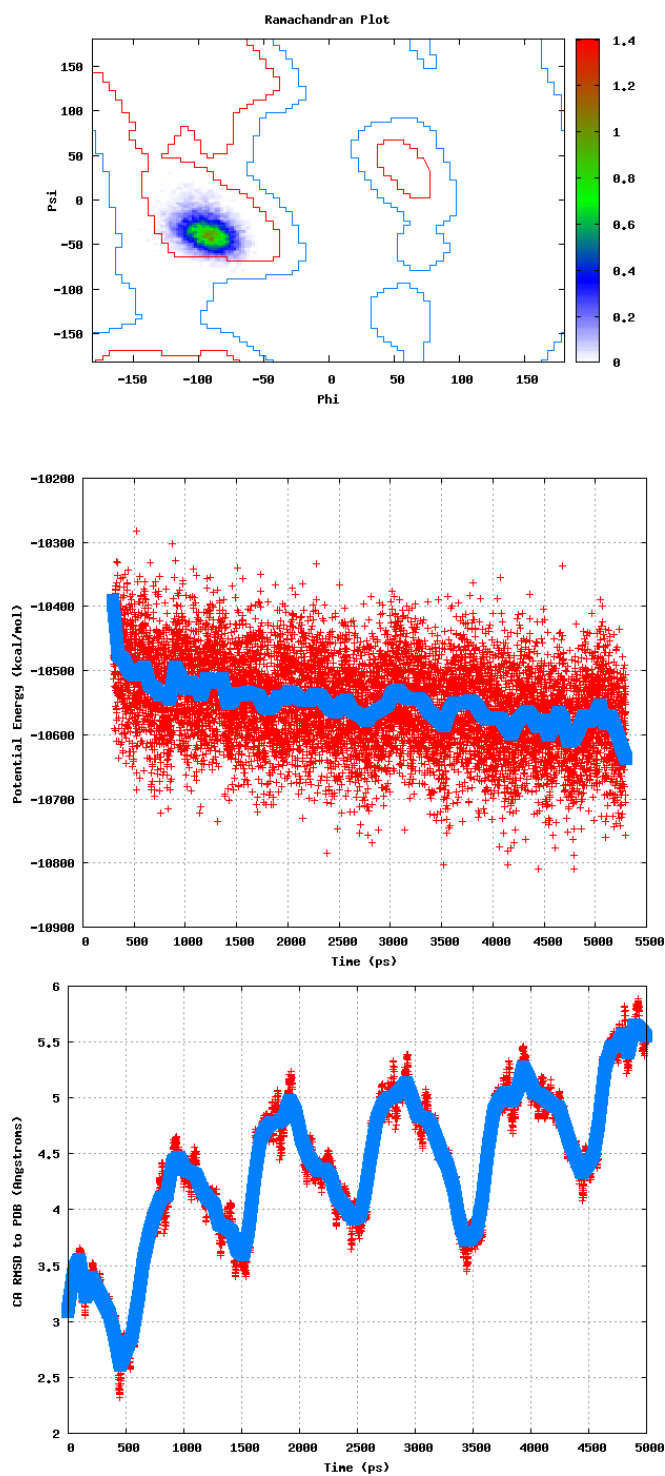

# 2XKJ

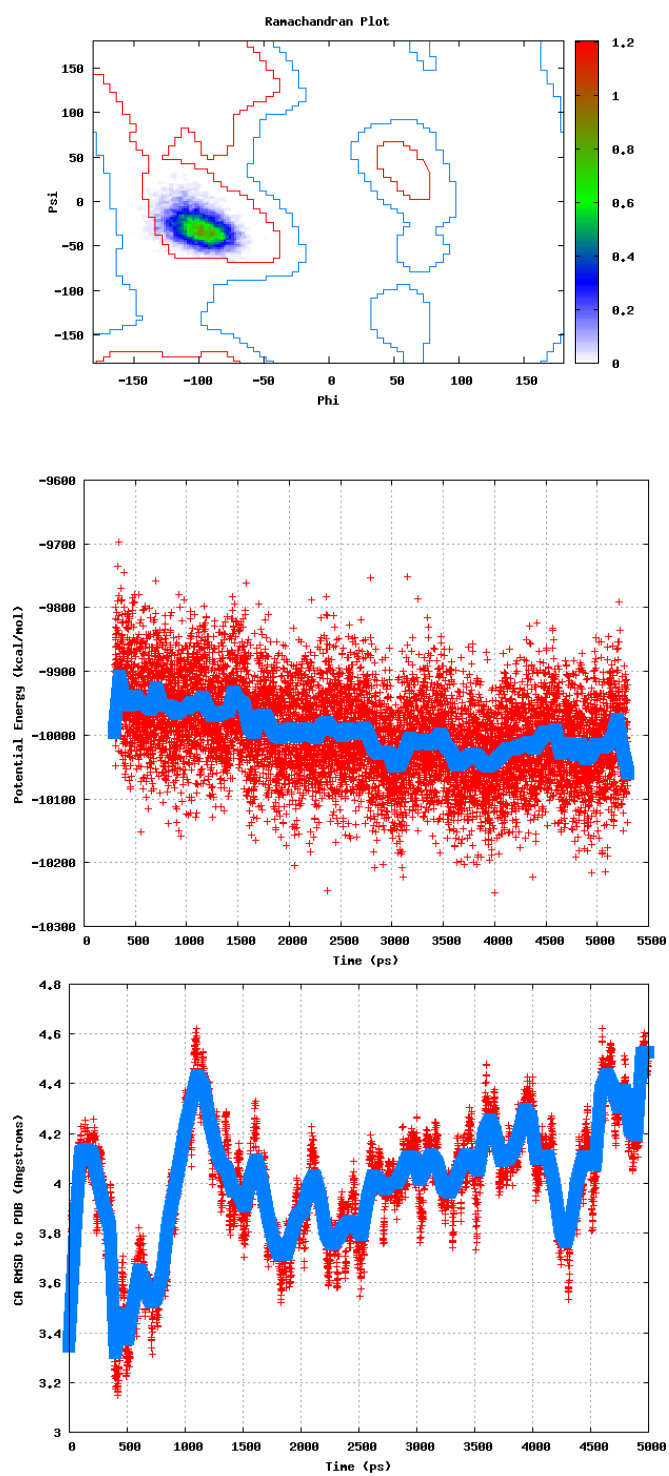

## 2JFM

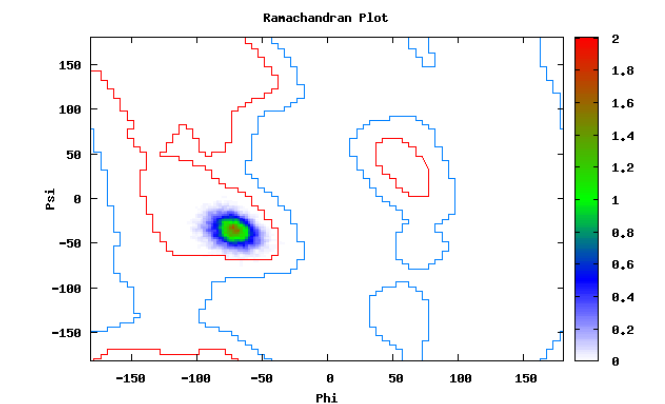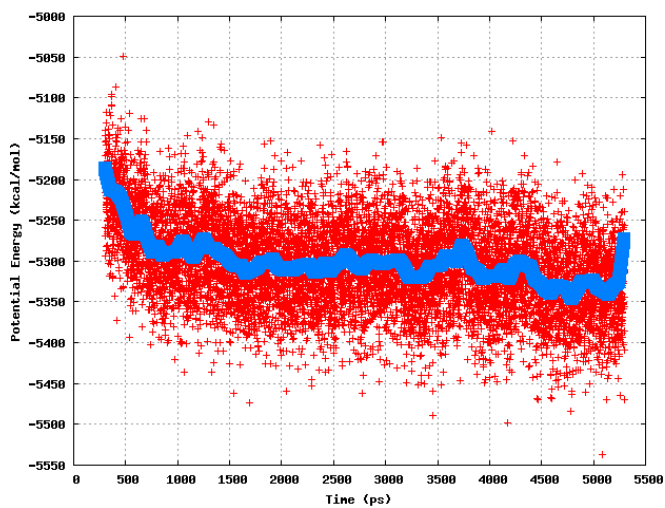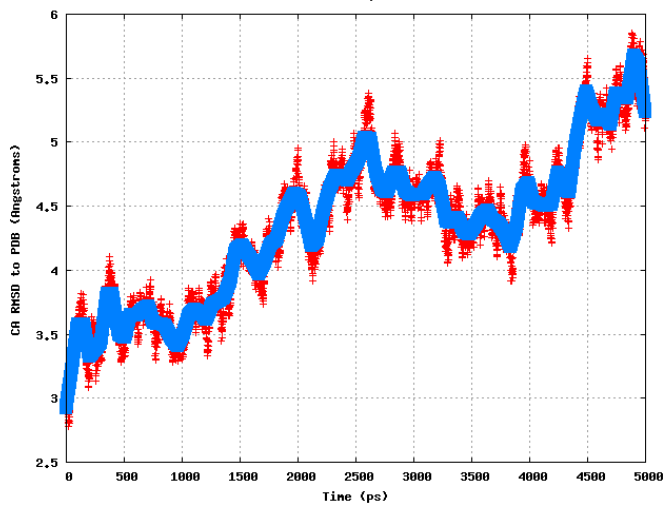

## 2J51

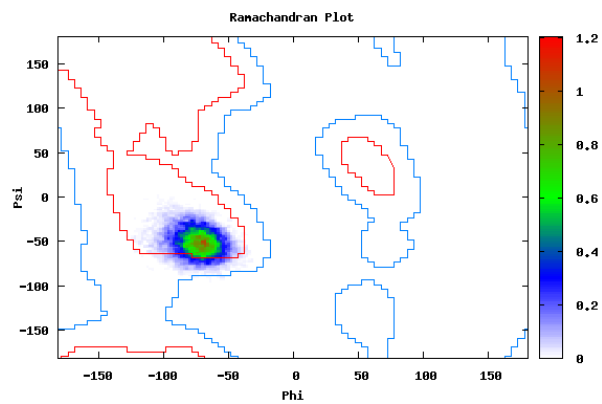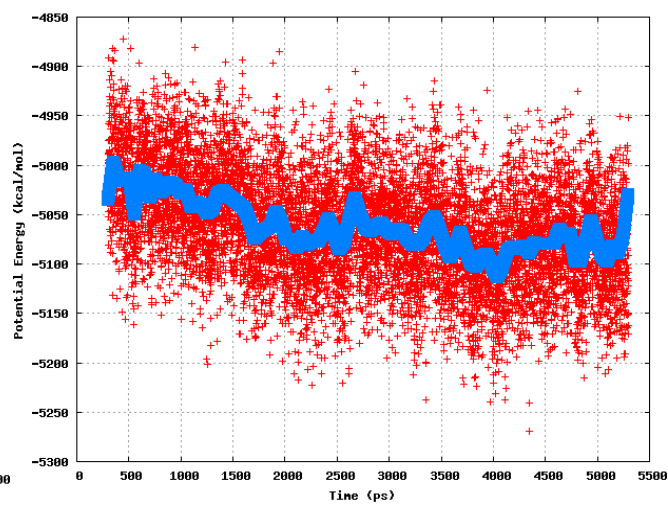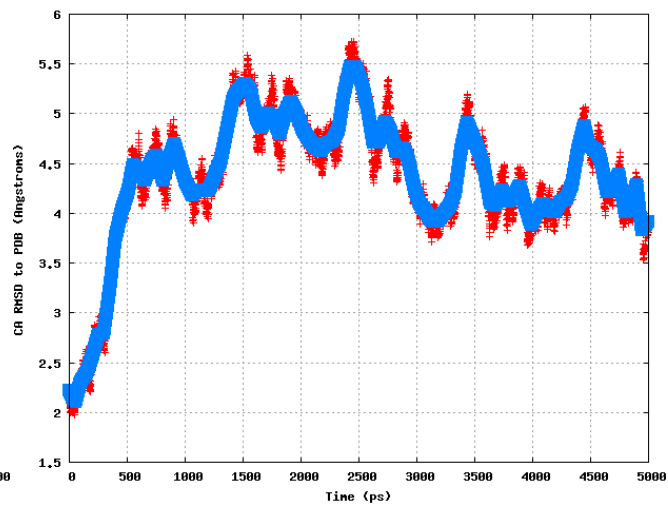



## 3D5W

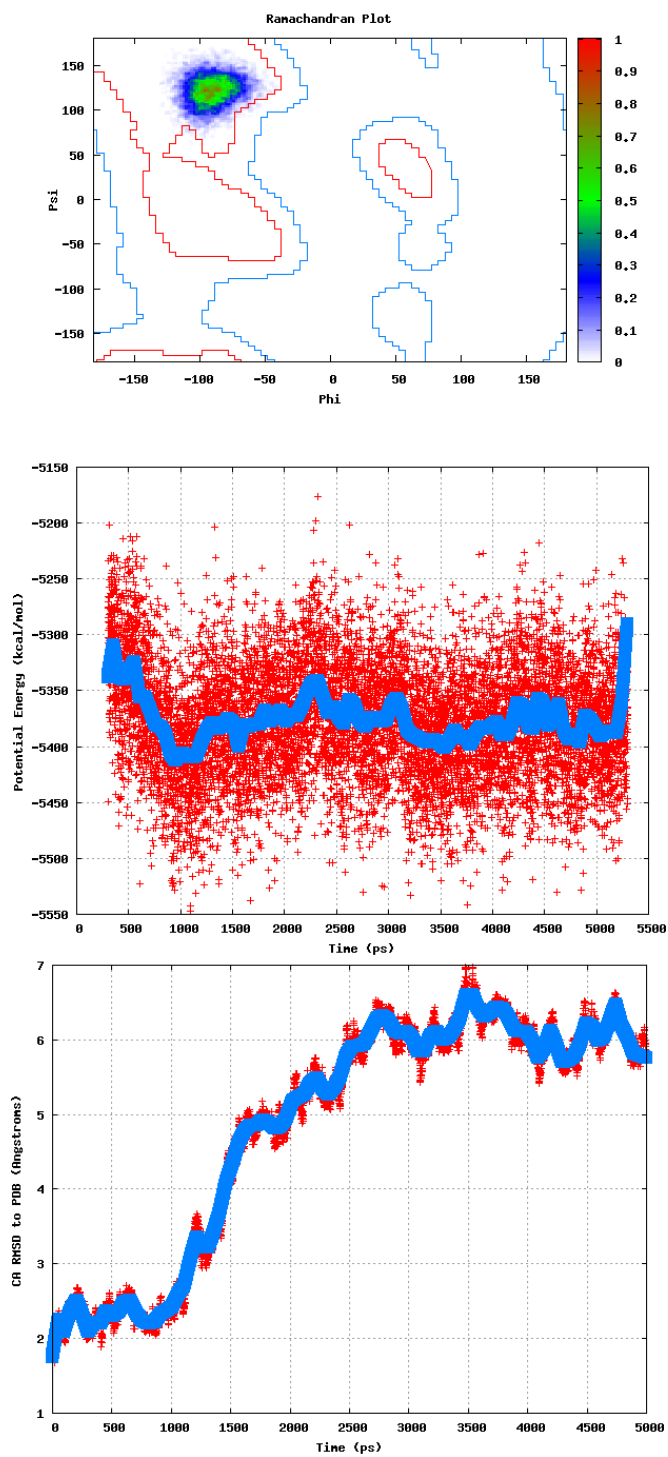

## 3D5U

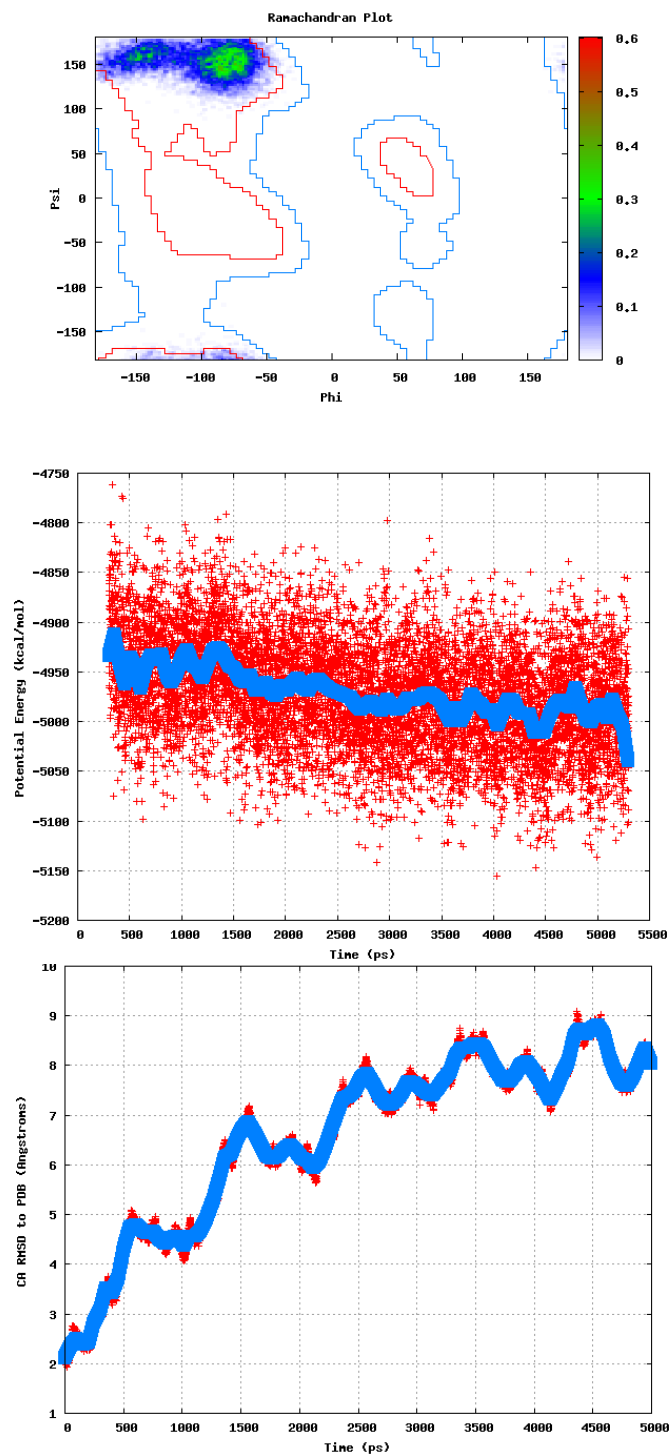



## 3CKX

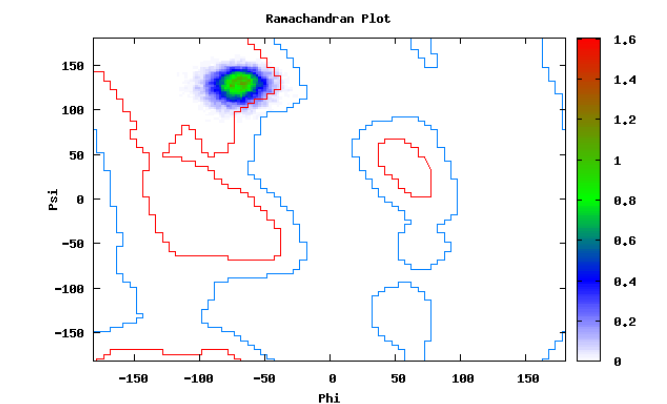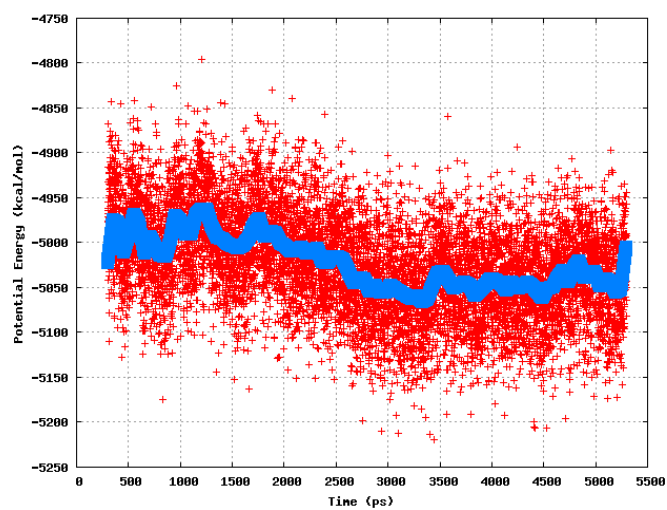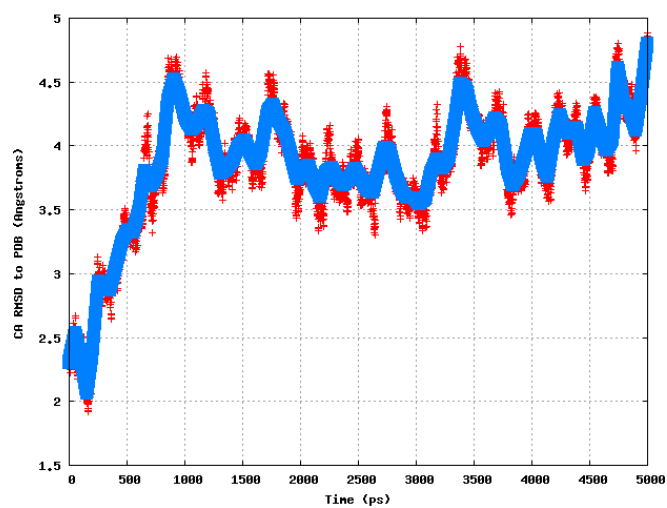

## 3CKW

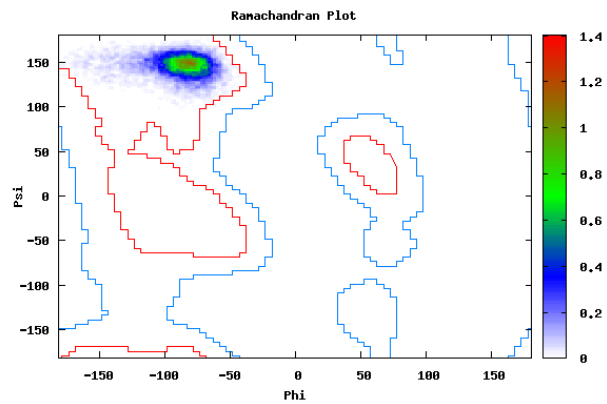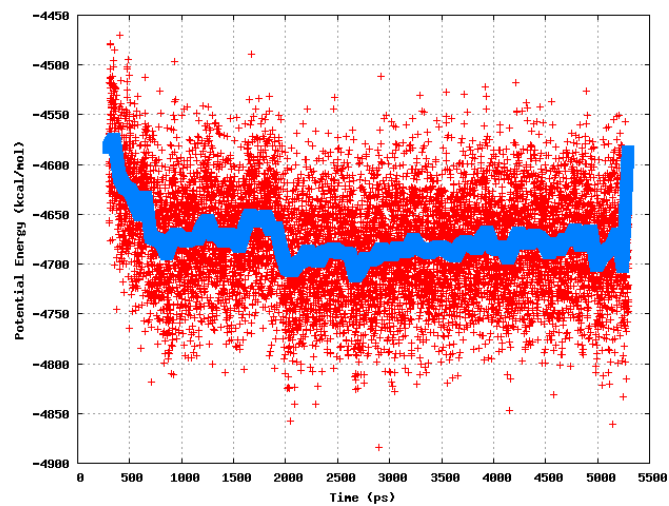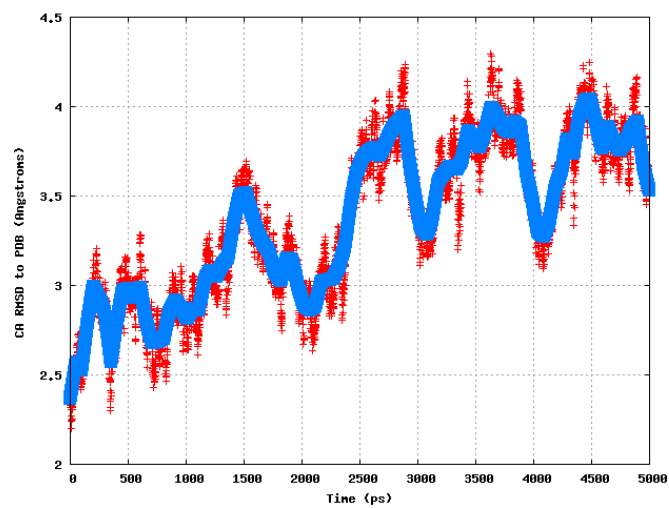

# 1V50

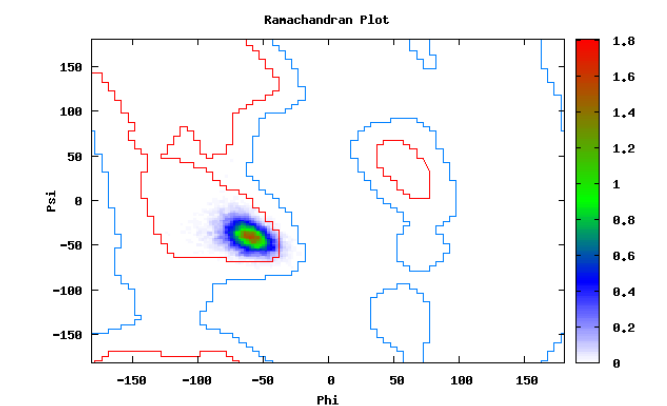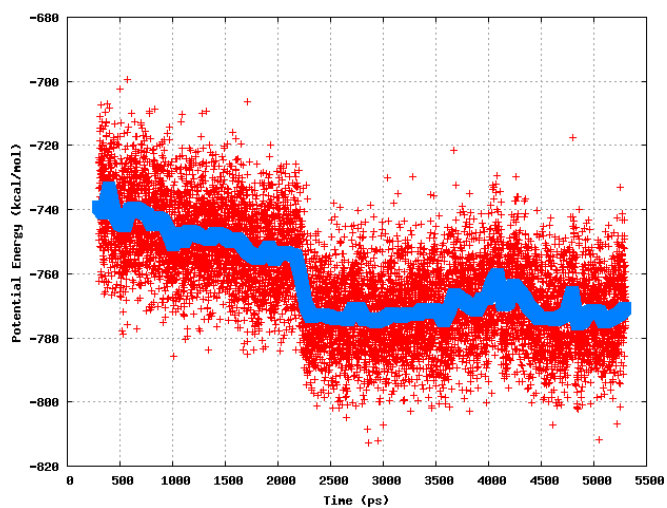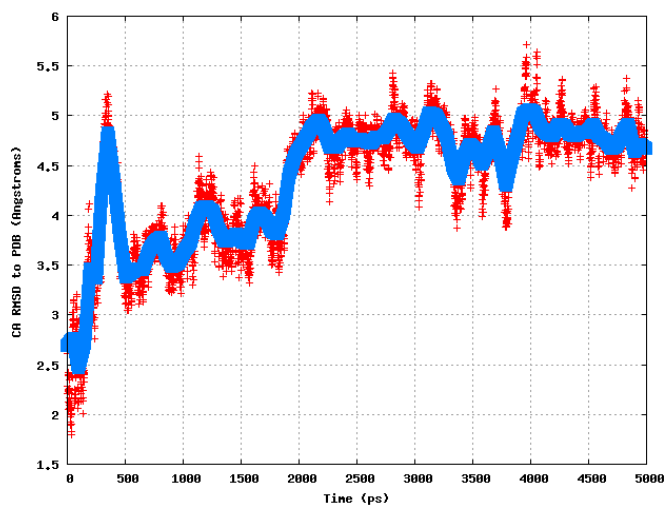

# 1V4Z

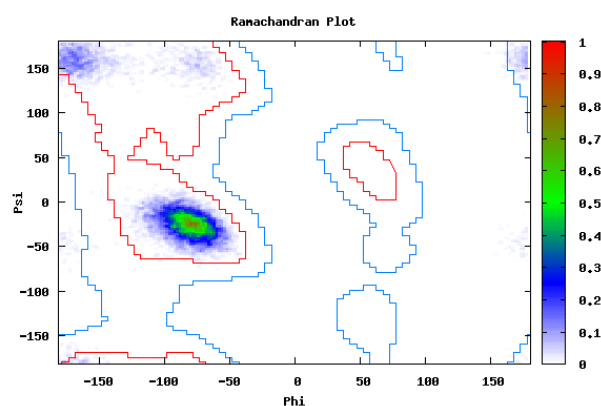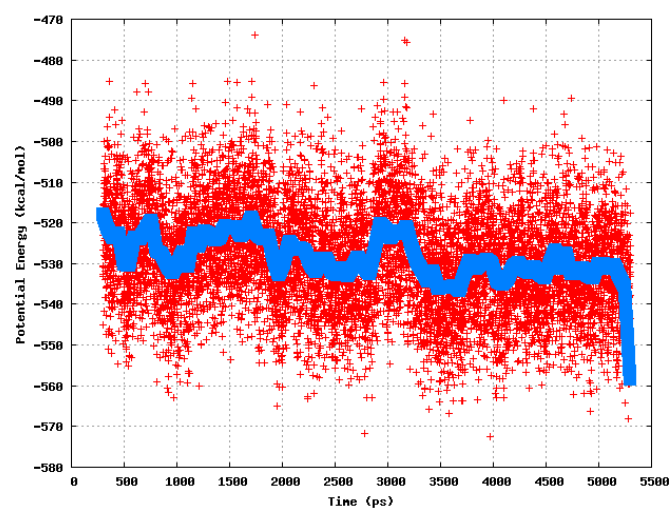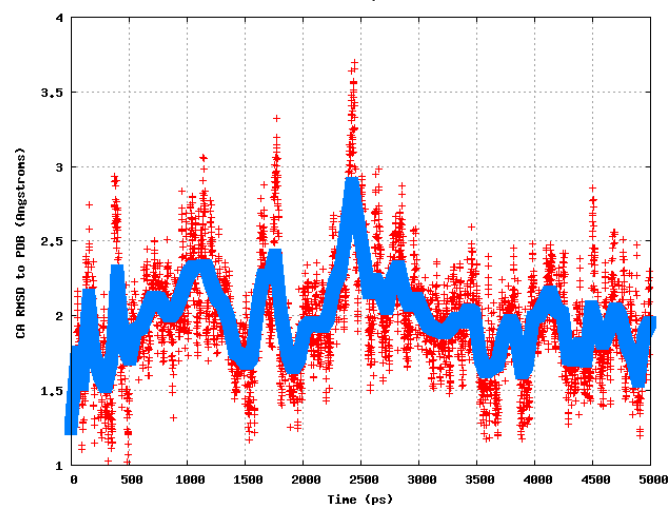

# 2L5J

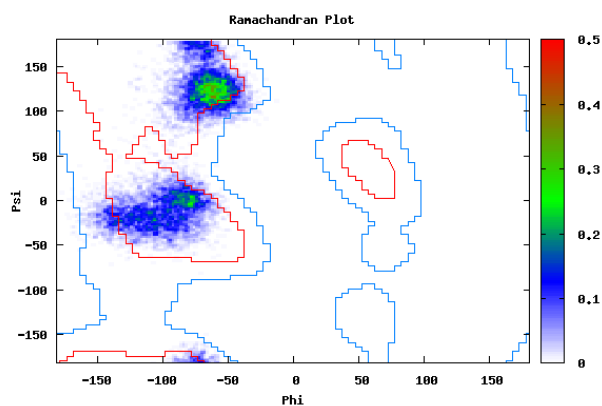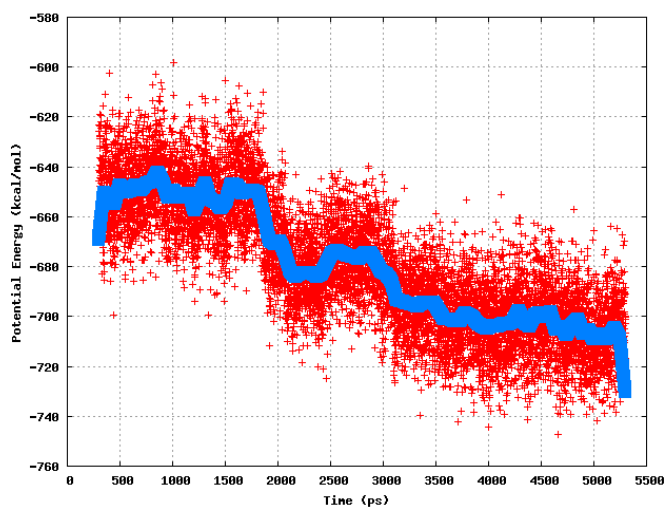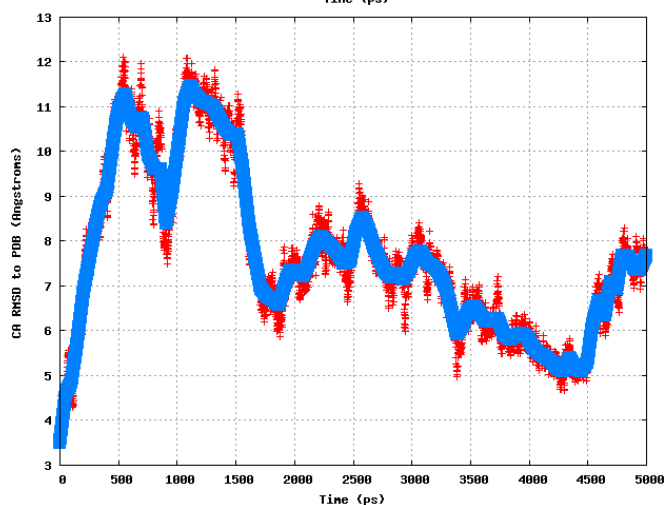

# 2L5I

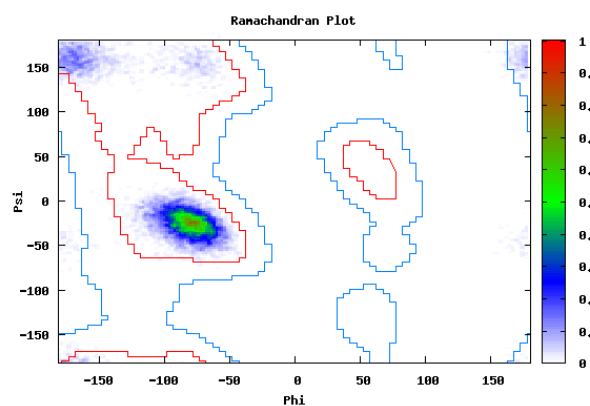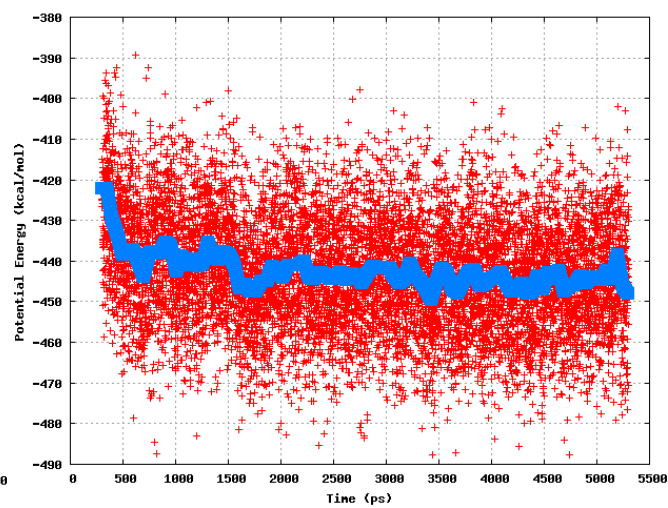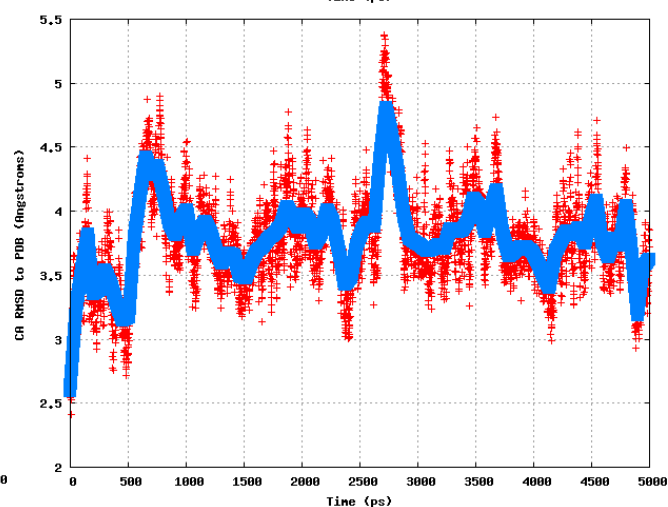

## 3NAY

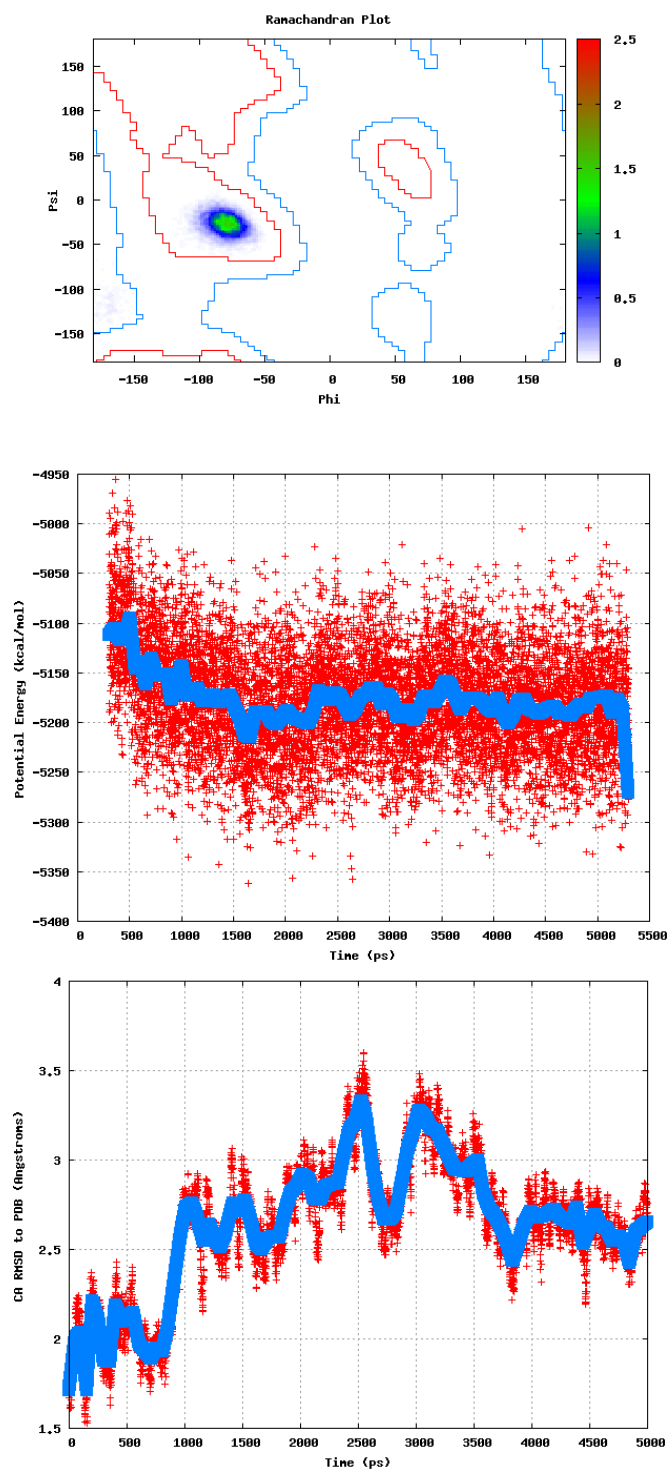

## 3NAX

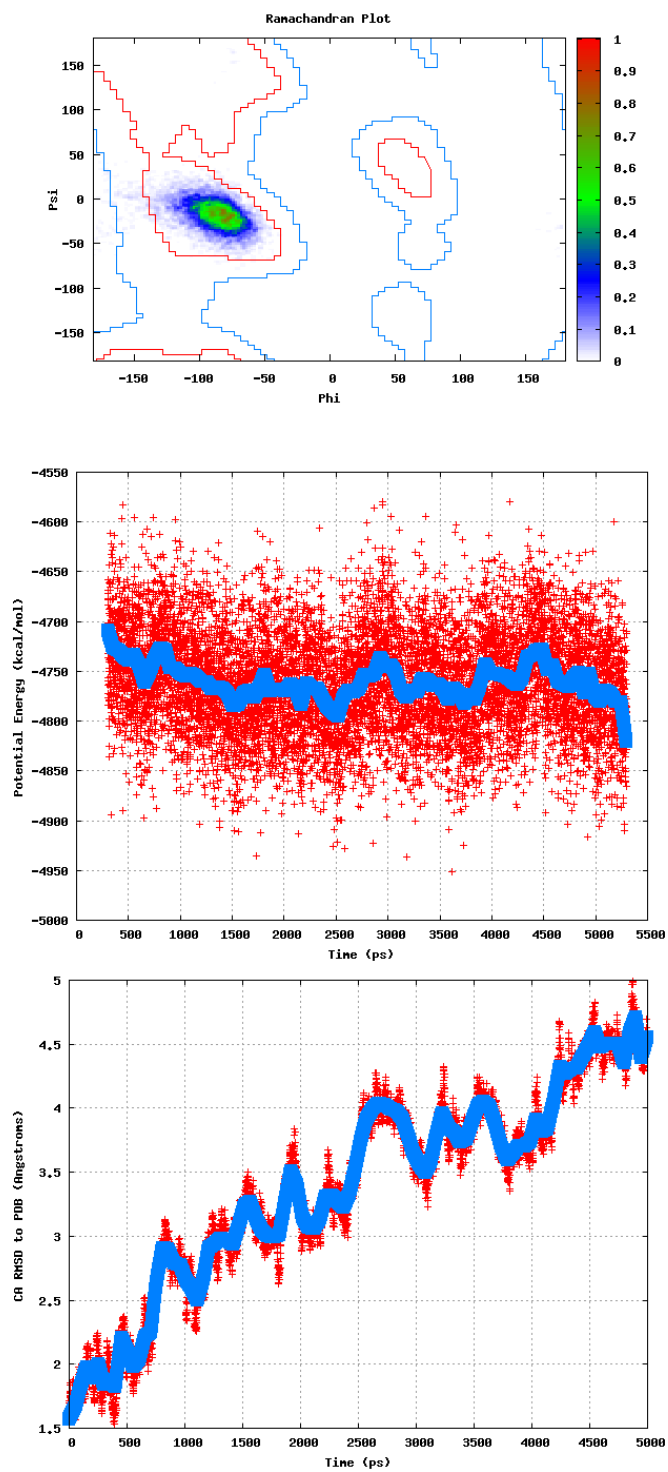

# 1KKM

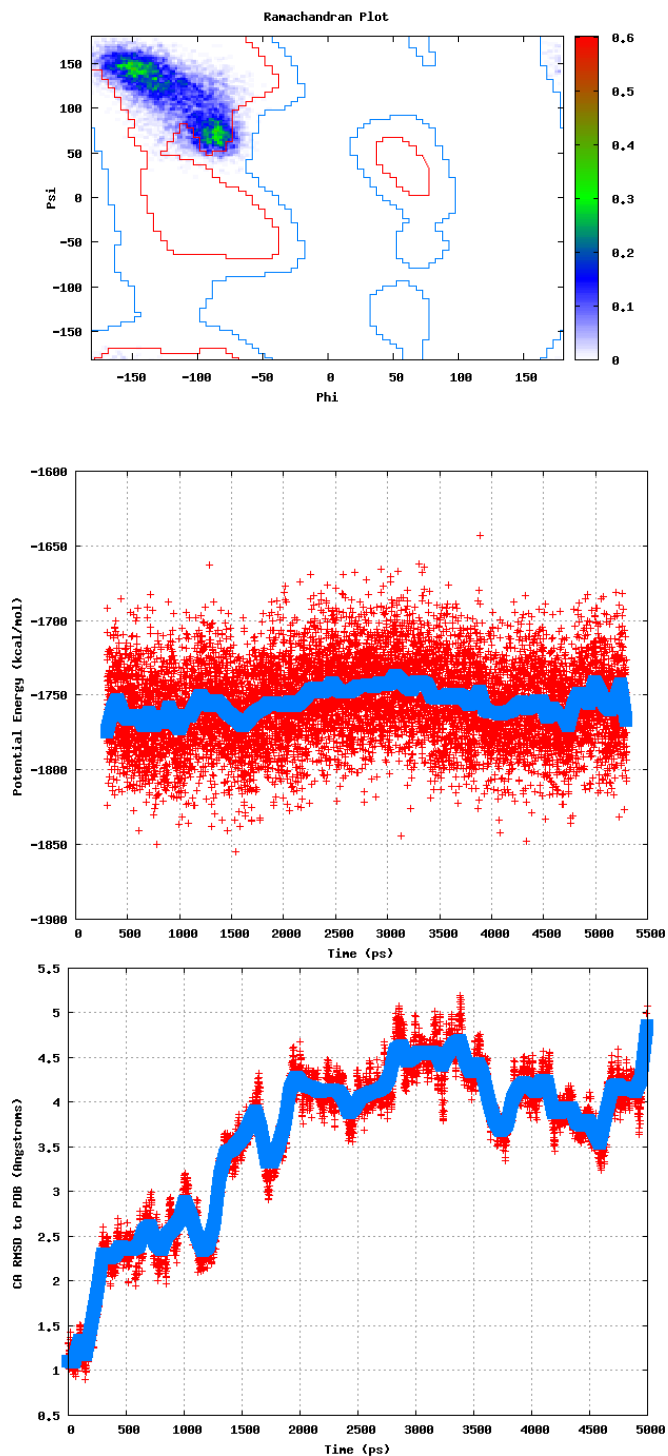

# 1KKL

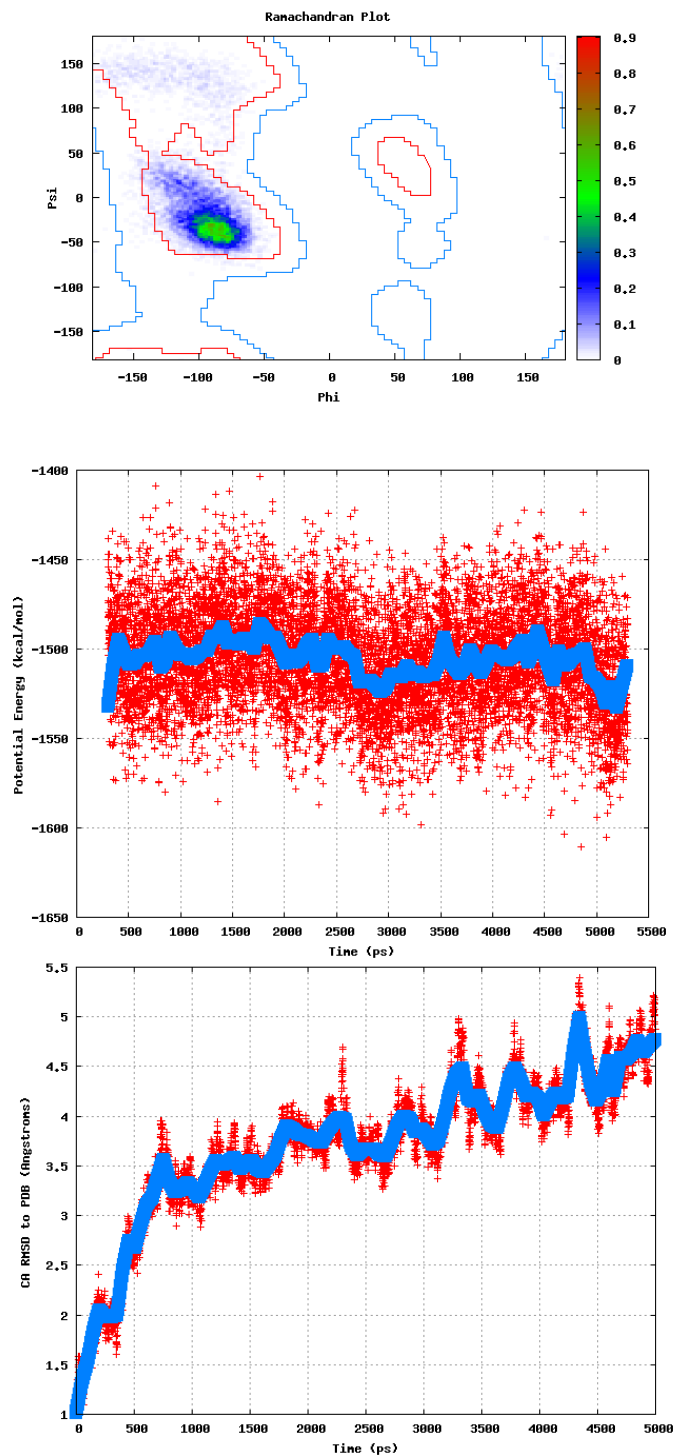

## 3IAF

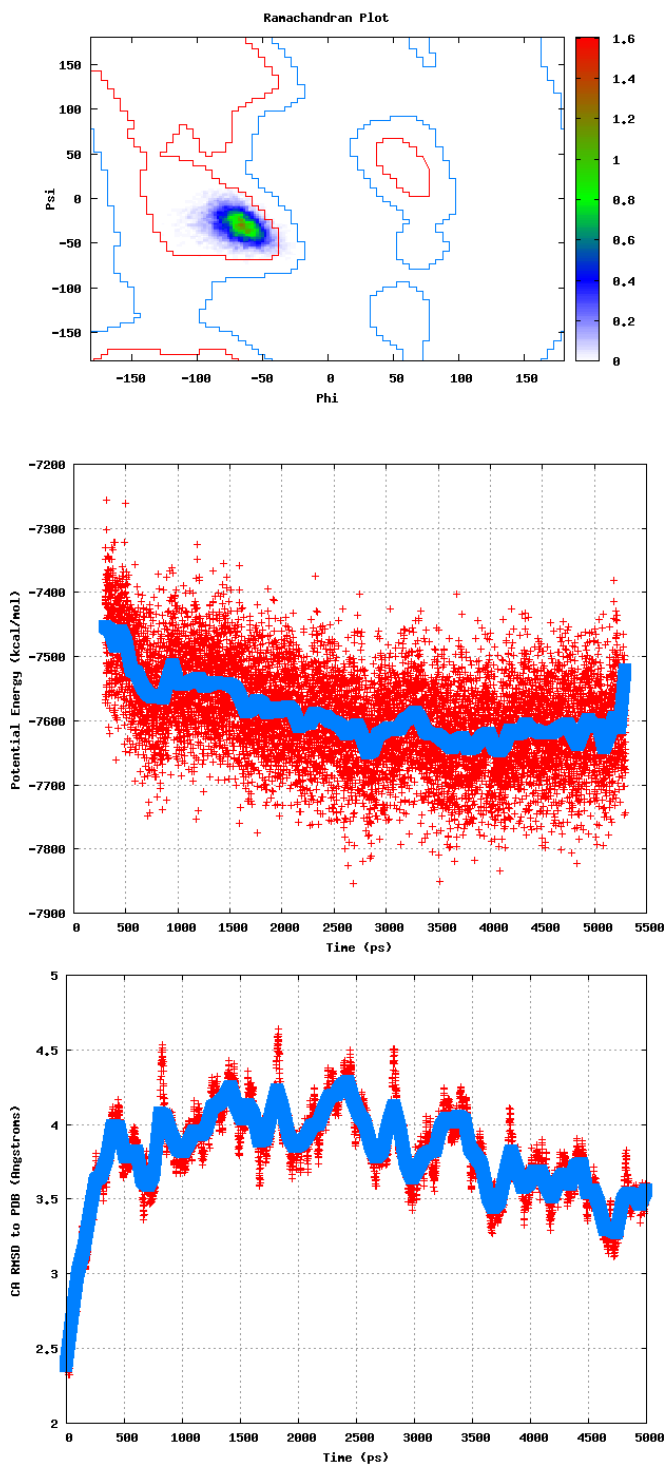

## 3IAE

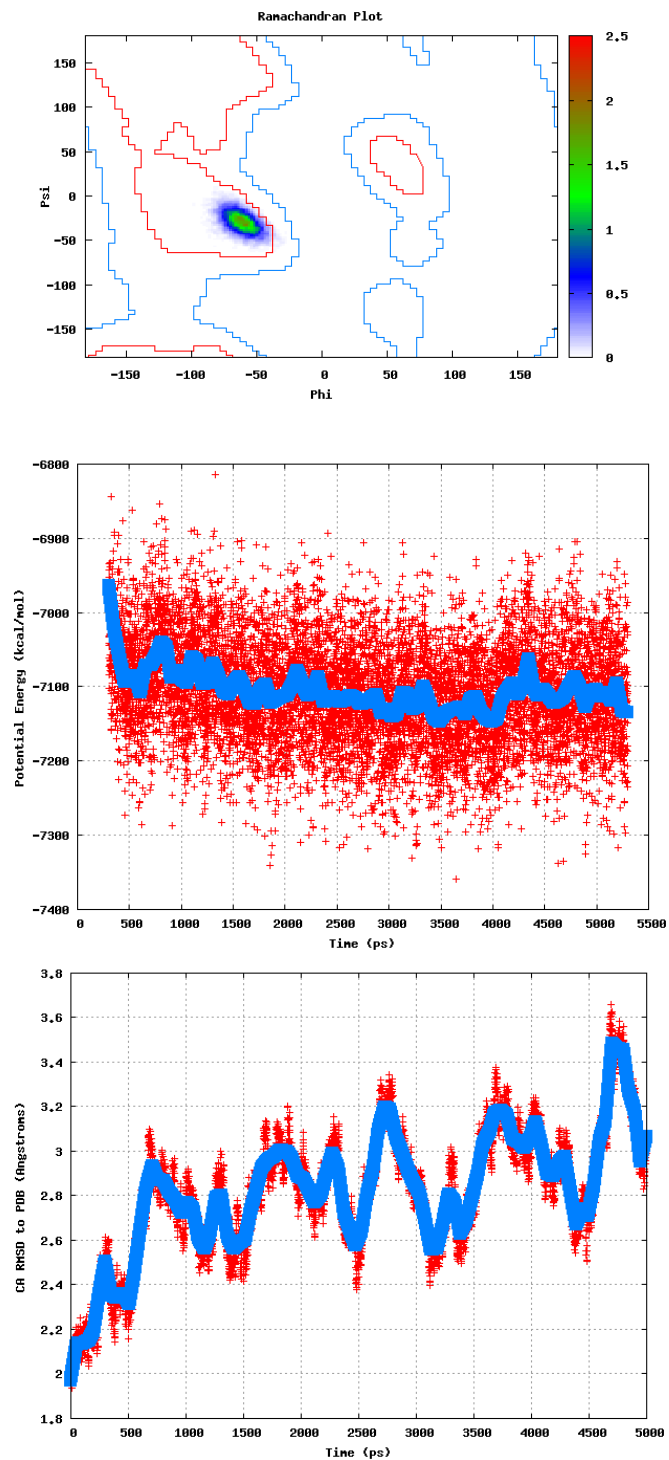



# 1H4X

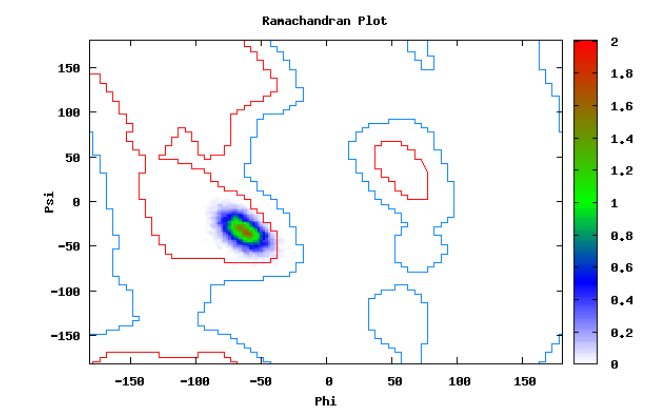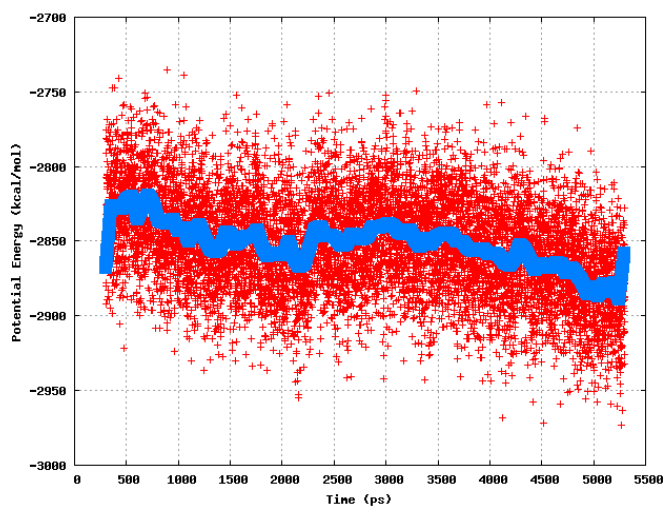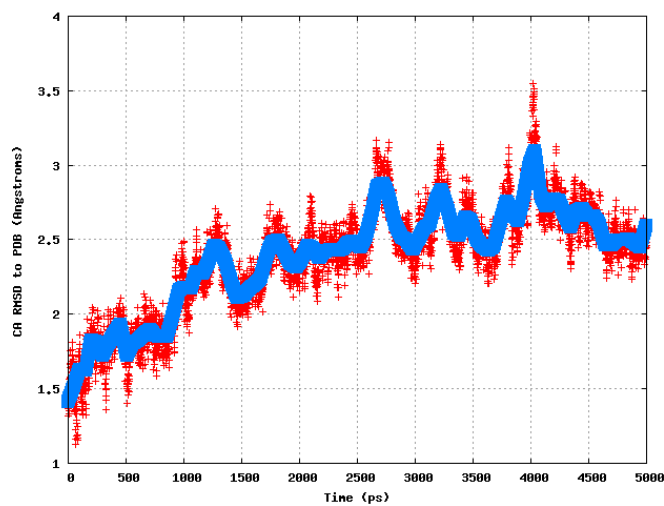

# 1H4Y

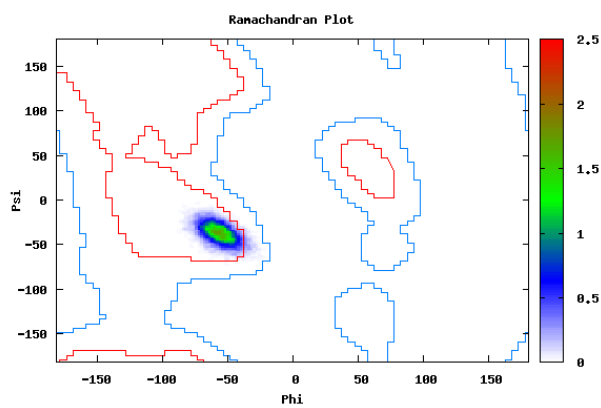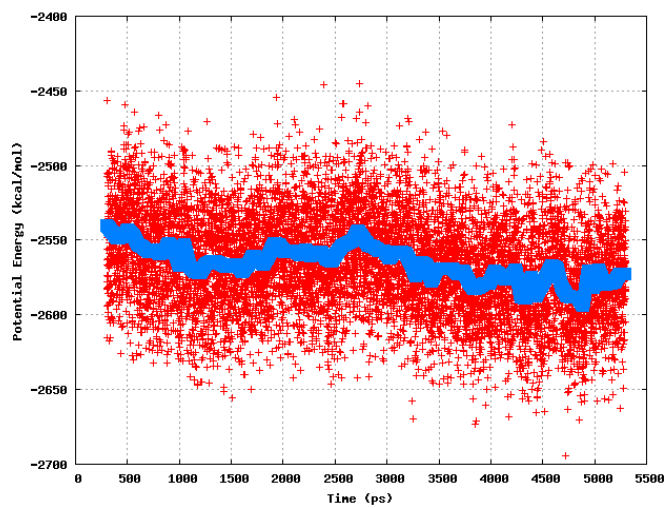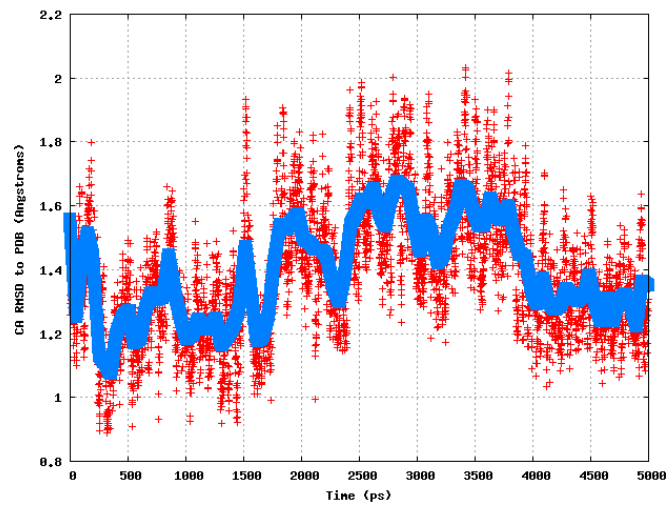

# 3F9X

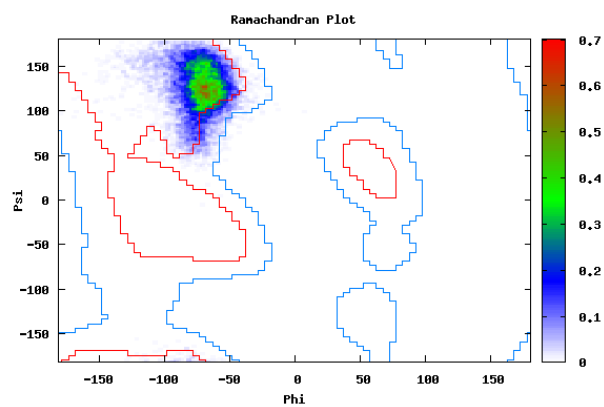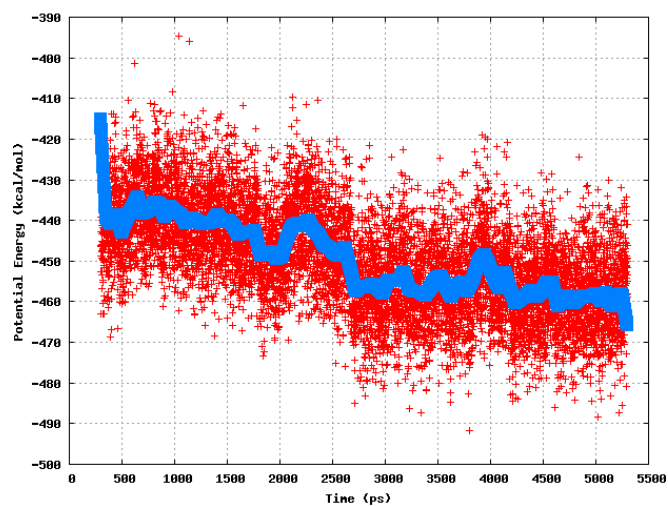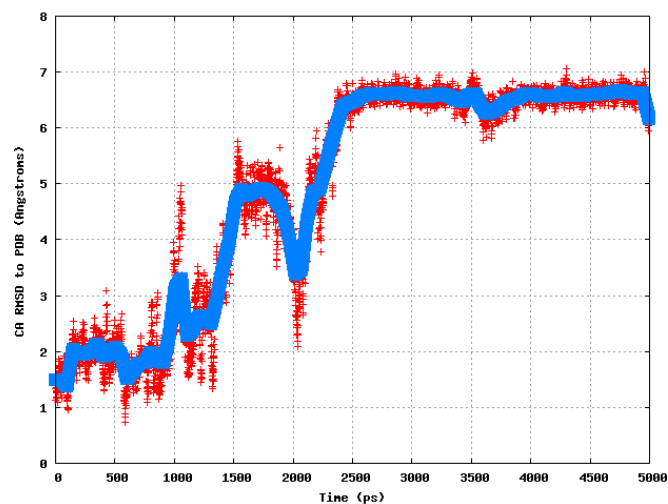

# 3F9W

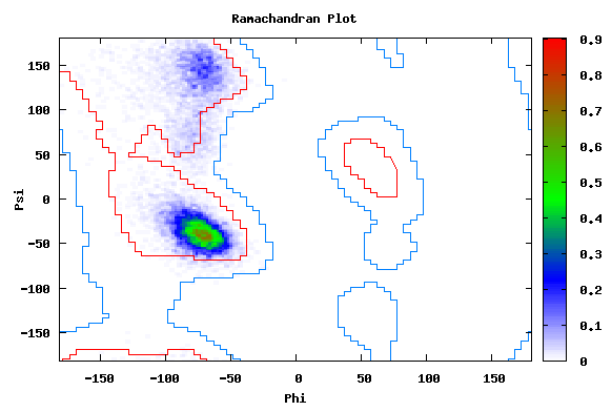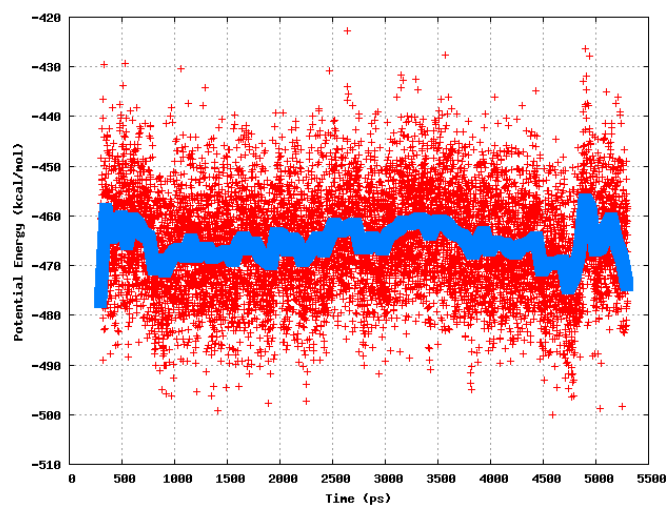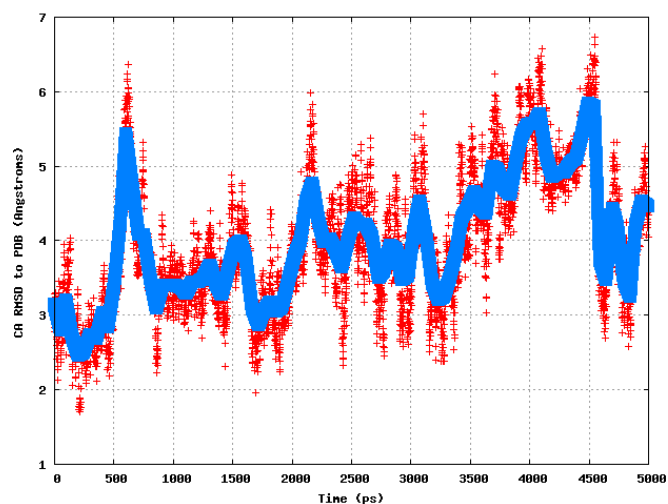



# 3S7D

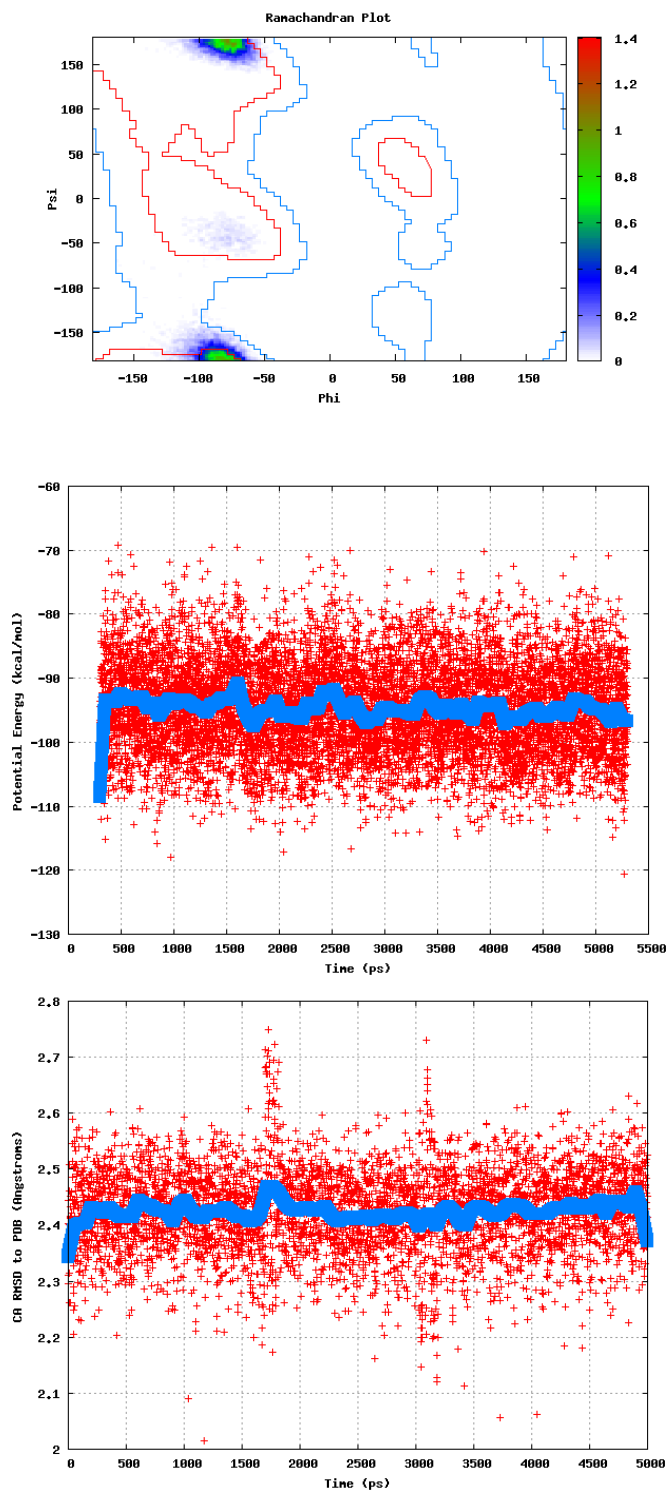

# 3S7F

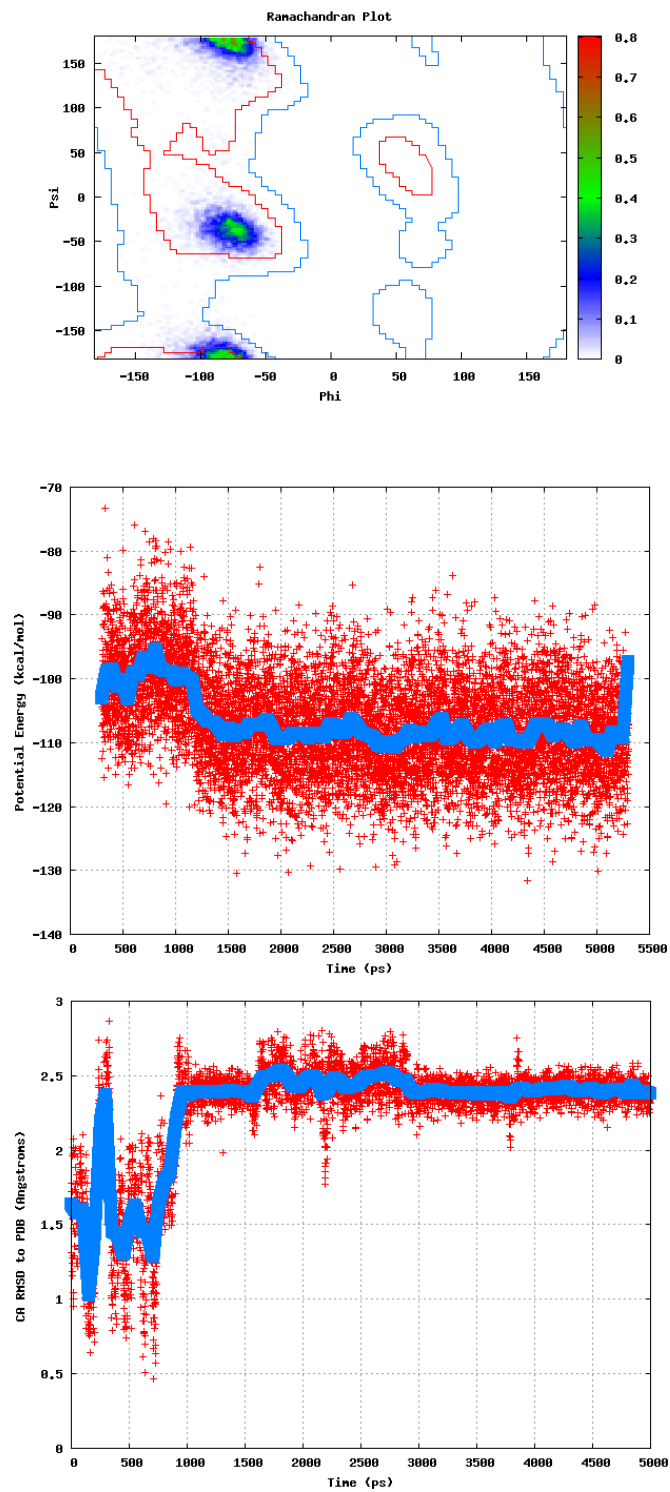

# 2KWJ

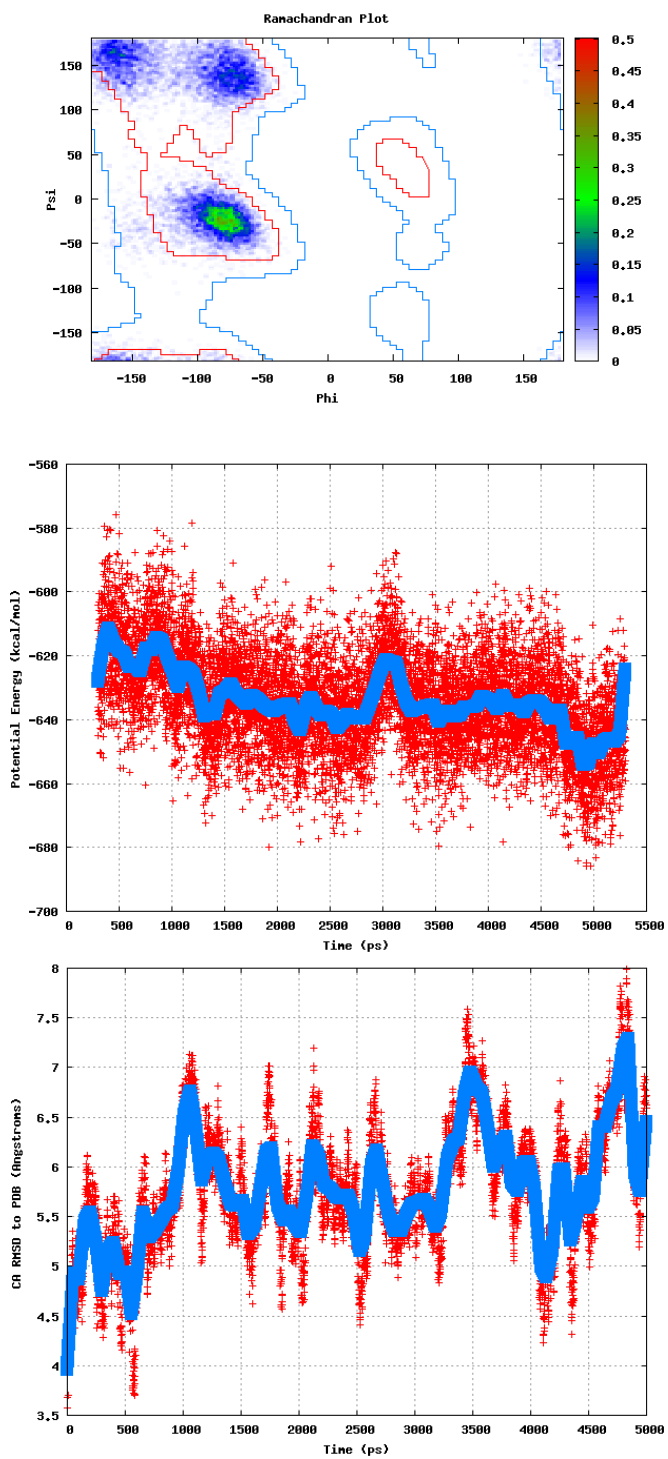

# 2KWK

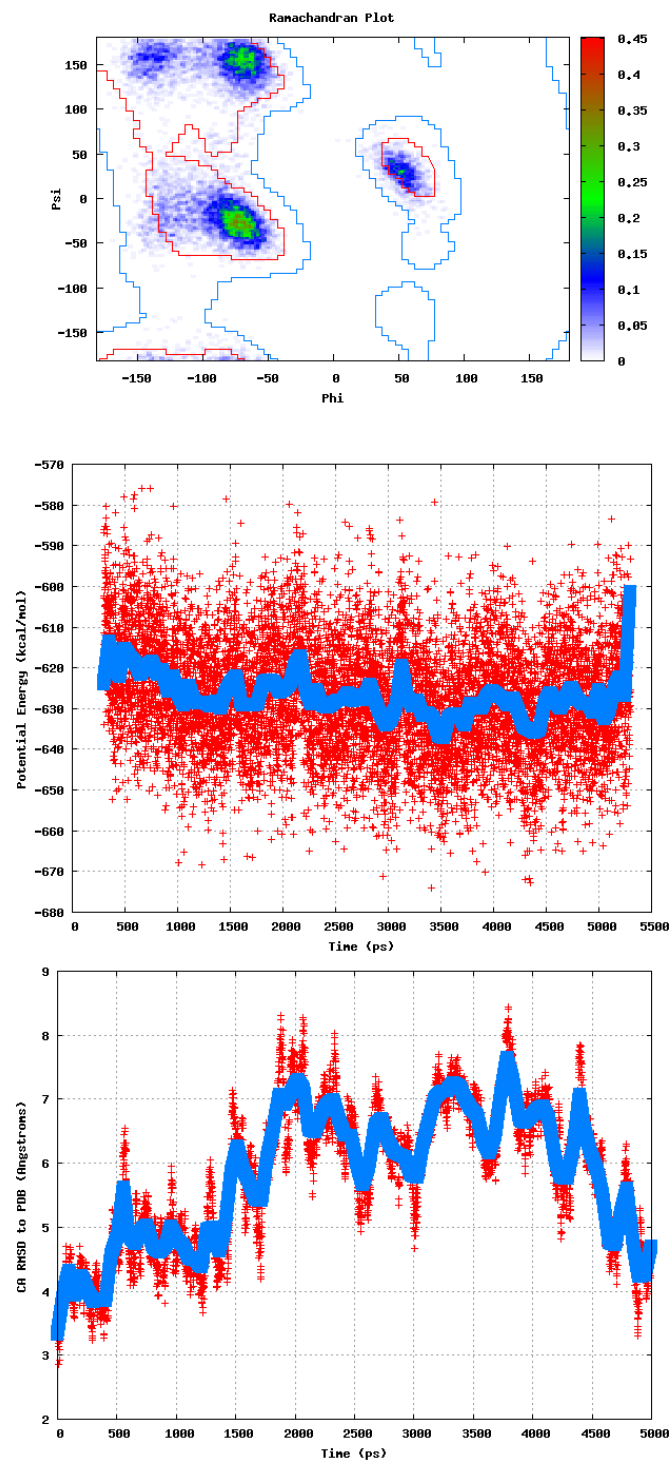

# Independent 25ns simulation 1V50

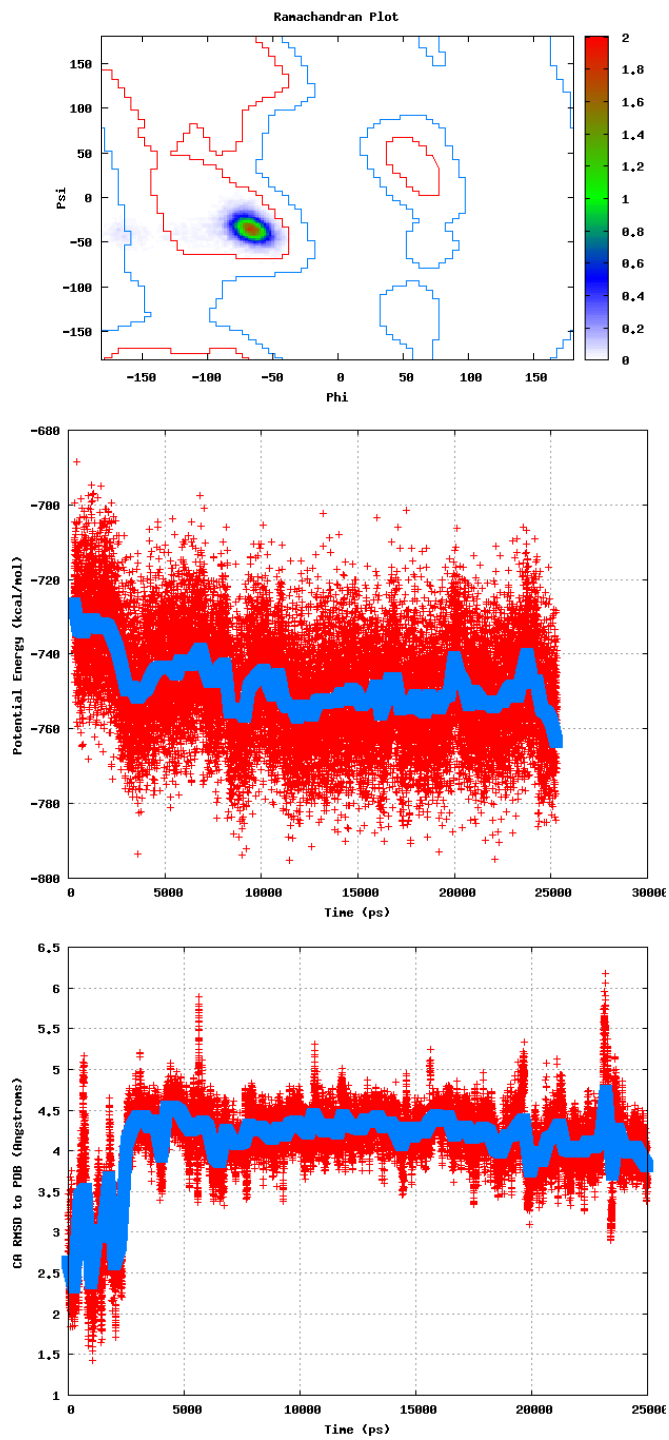

# Independent 25 ns simulation 3DK6

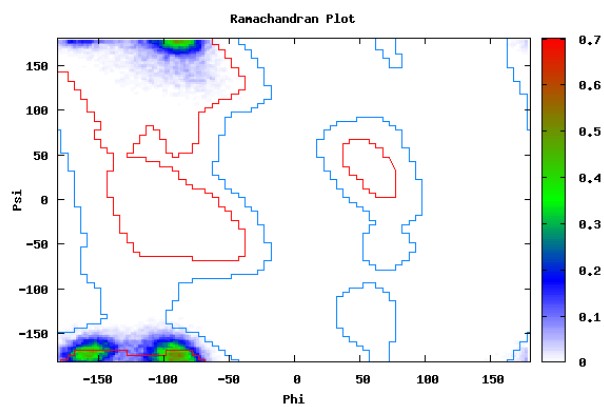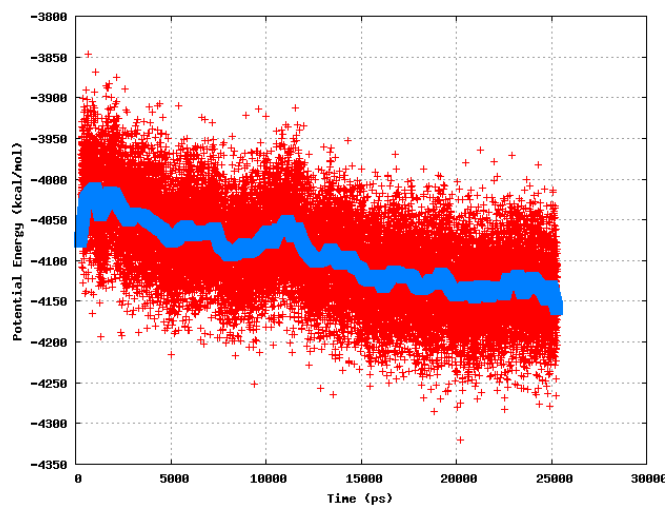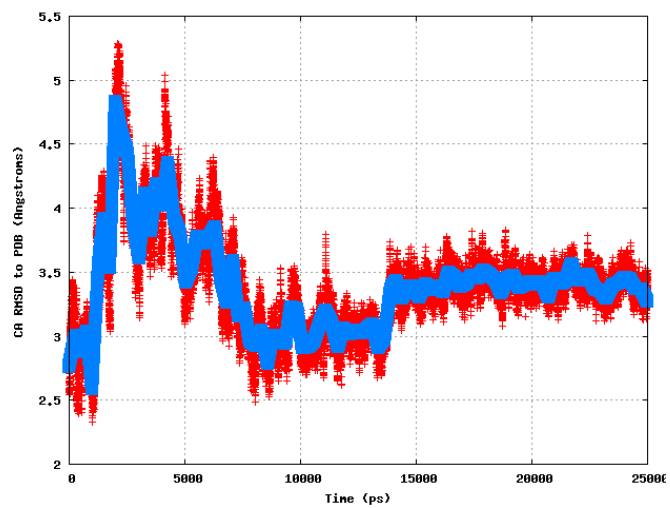

Independent 25 ns simulation  
1D4W

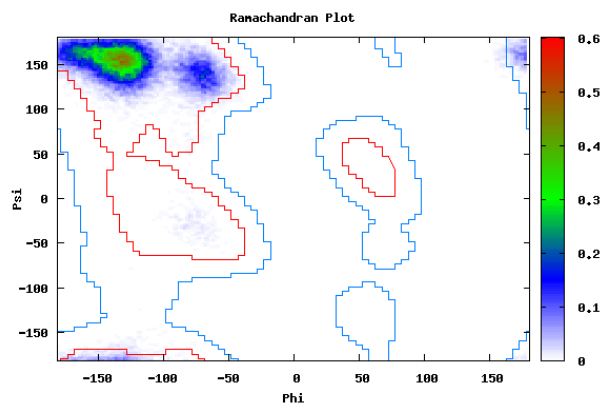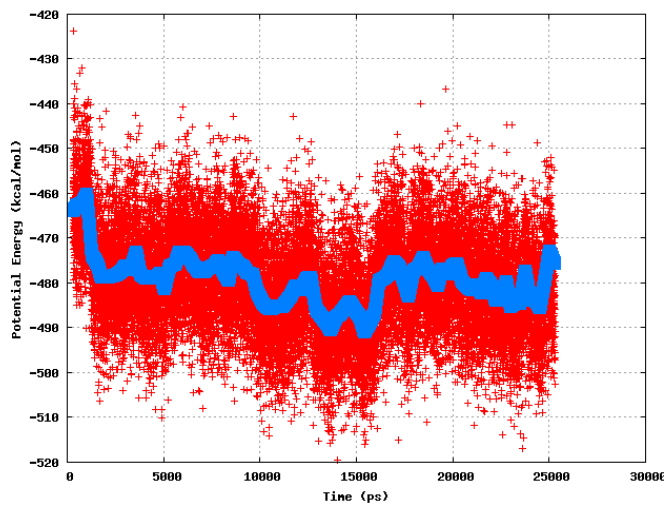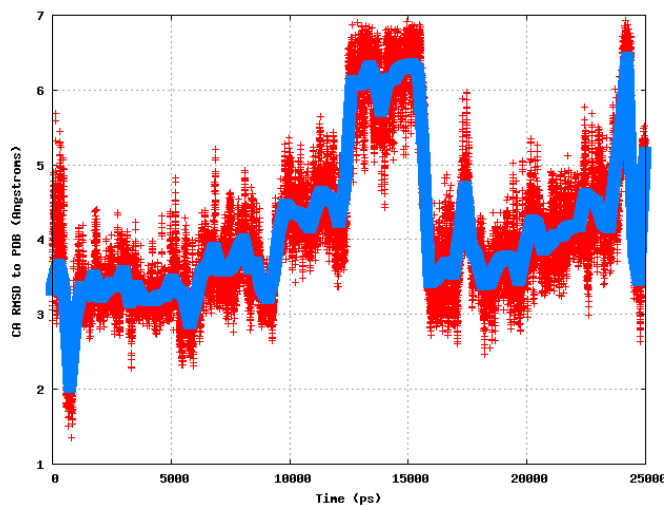

**We present additional simulations of comparisons of the Unmodified Structure (U-PDB) Modified and Simulated, compared to the simulation of the Modified Structure and to the native modified structure (M-PDB). These are in addition to the 3S7F/3S7D example provided in the main text, denoted as Comparisons D and E.**

## 3DK6

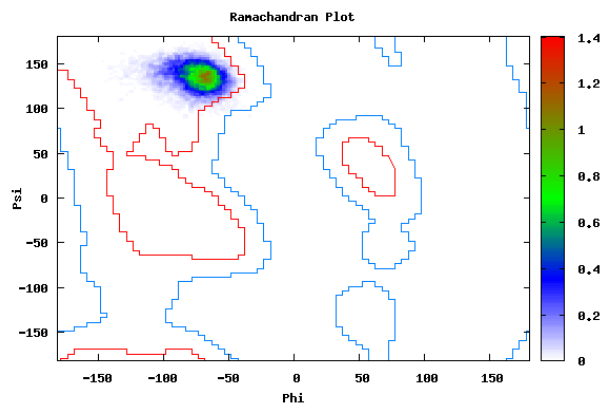

3DK6 PDB Structure

3DK6 (5 ns)

3DK3 Y393→pTyr (5 ns)

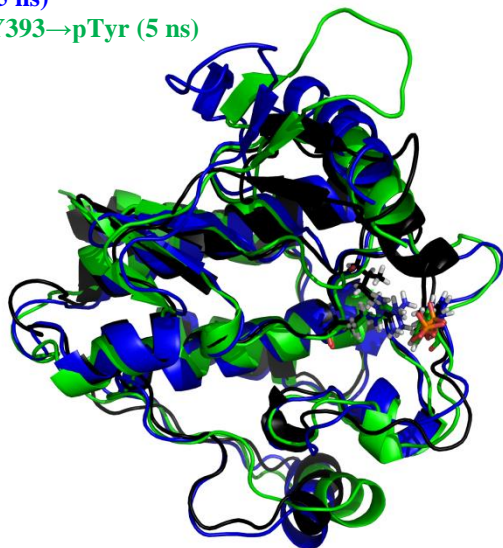

## 3DK3 Y393→pTyr

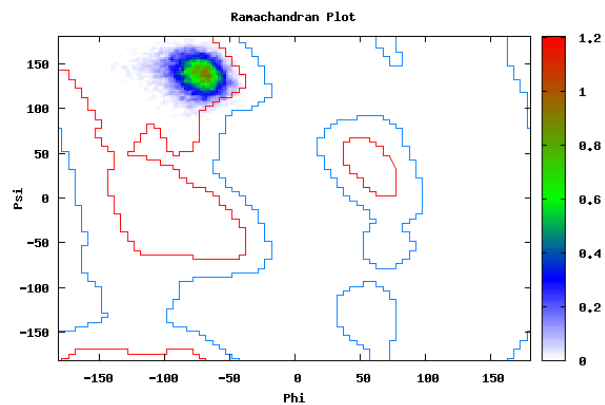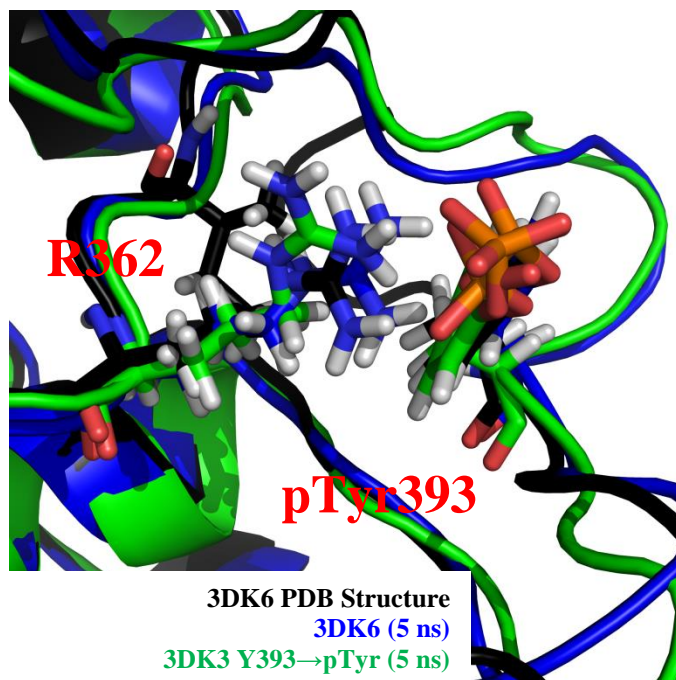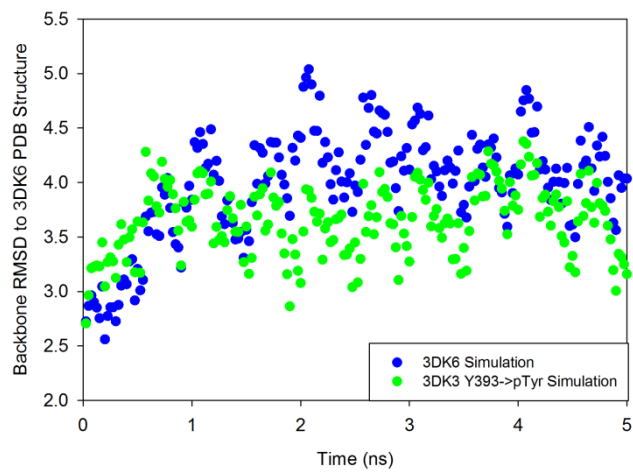



3IAF

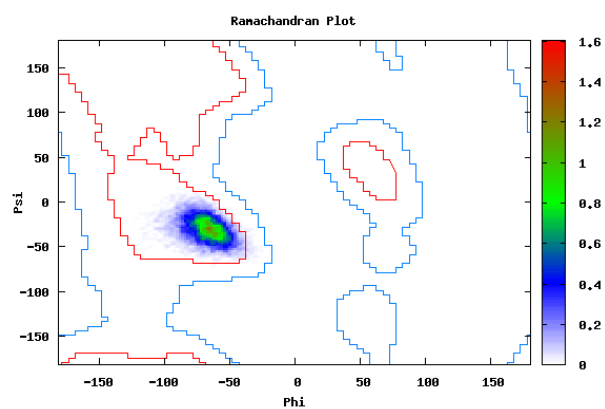

3IAE S28→pSer

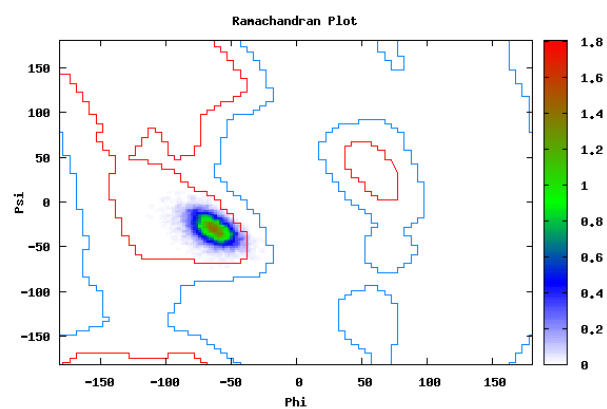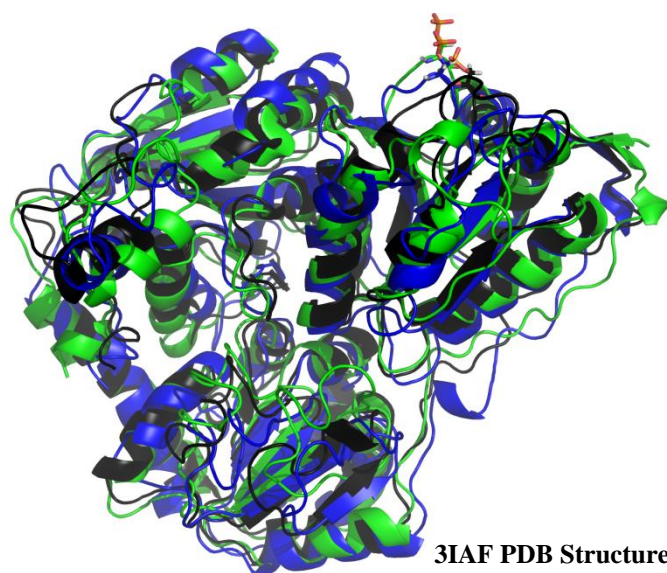

3IAF PDB Structure  
3IAF (5 ns)  
3IAE S28→pSer (5 ns)

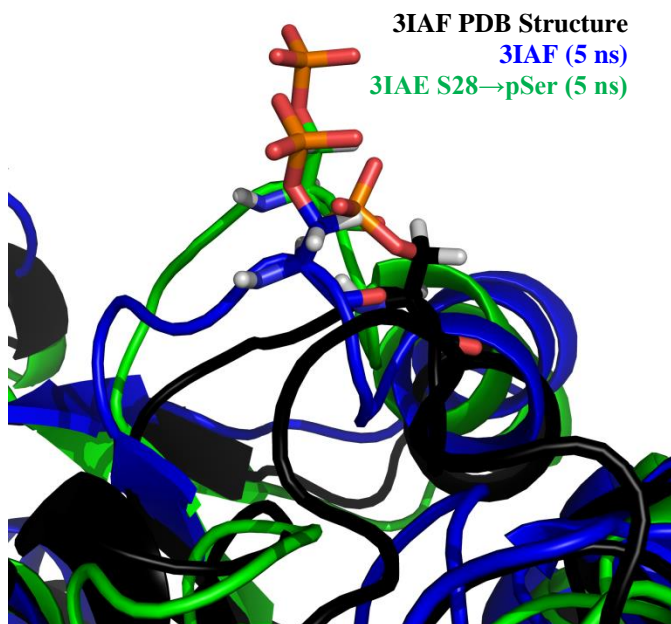

3IAF PDB Structure  
3IAF (5 ns)  
3IAE S28→pSer (5 ns)

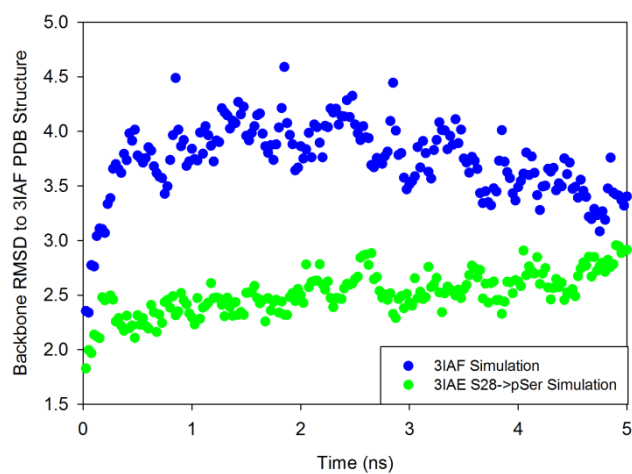



#### **4.4 Images of Torsion Angles Assessed Using Ab Initio Rotational Profiles**

Images of the specific torsions that were assessed for their *ab initio* rotational profiles are depicted below in grey.

The torsion angles considered were CT-OS-P-OS from negatively charged phosphothreonine (TPO)

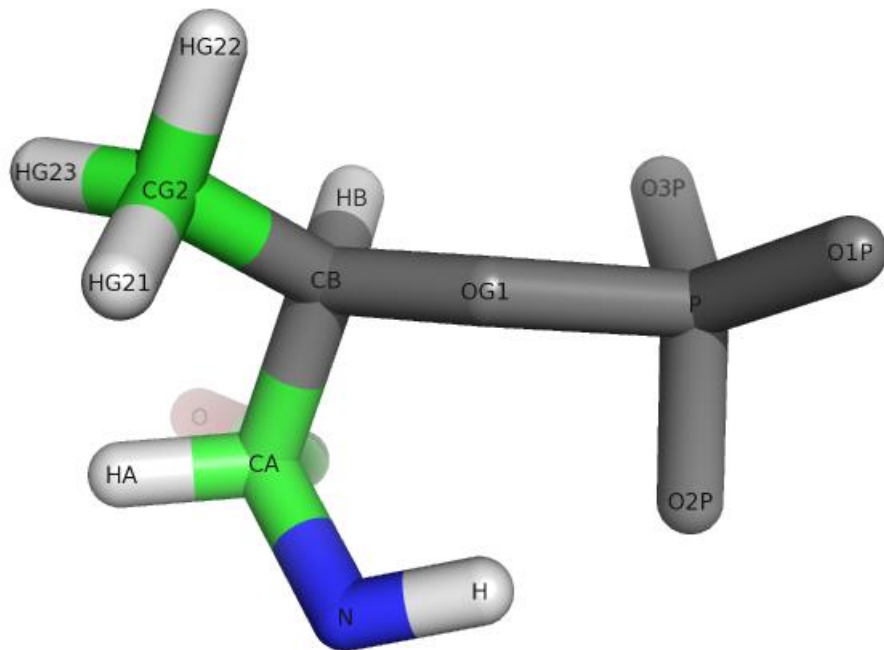

CT-CT-C-O from 1-carboxyglutamic acid (CGU)

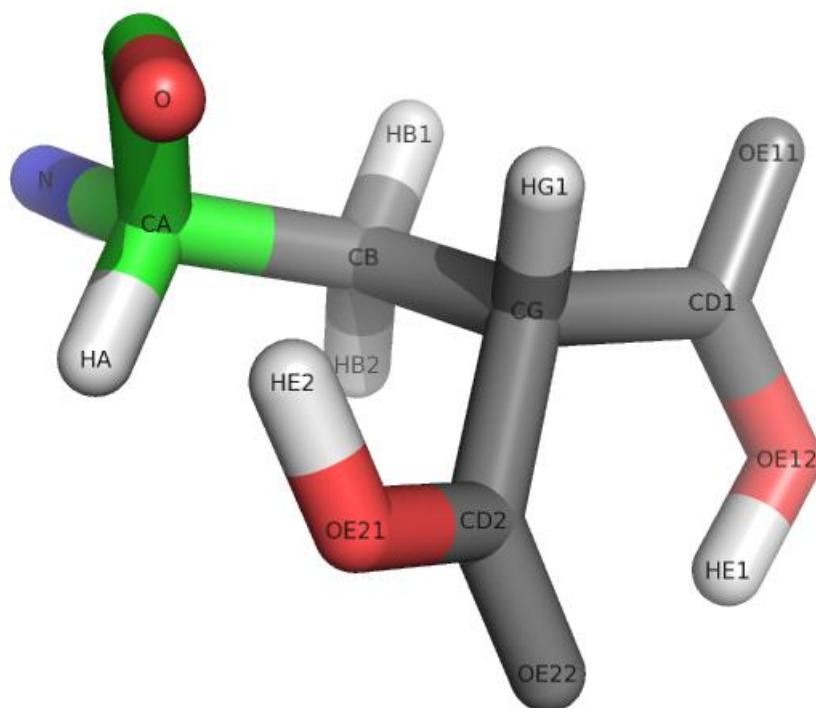

CT-CT-S-OH from cysteine sulfenic acid (CSO)

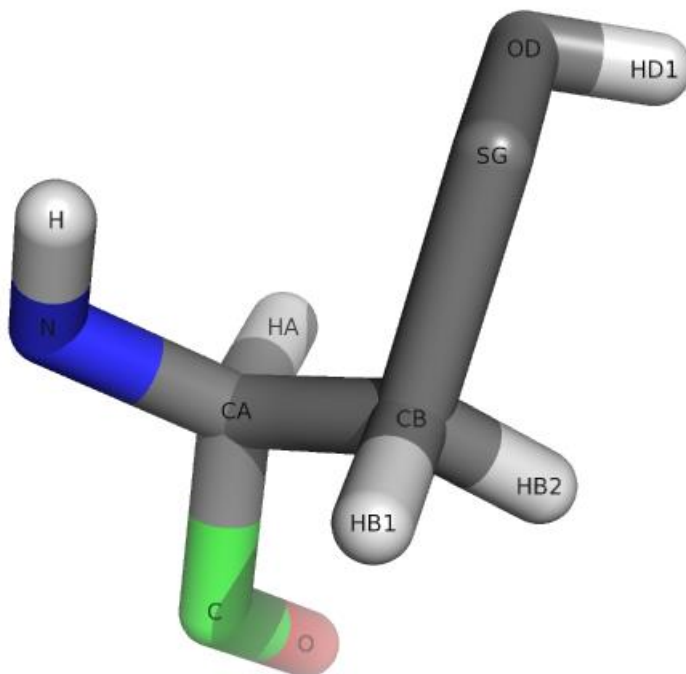

CT-OS-P-O2 from neutral phosphoserine (SEN)

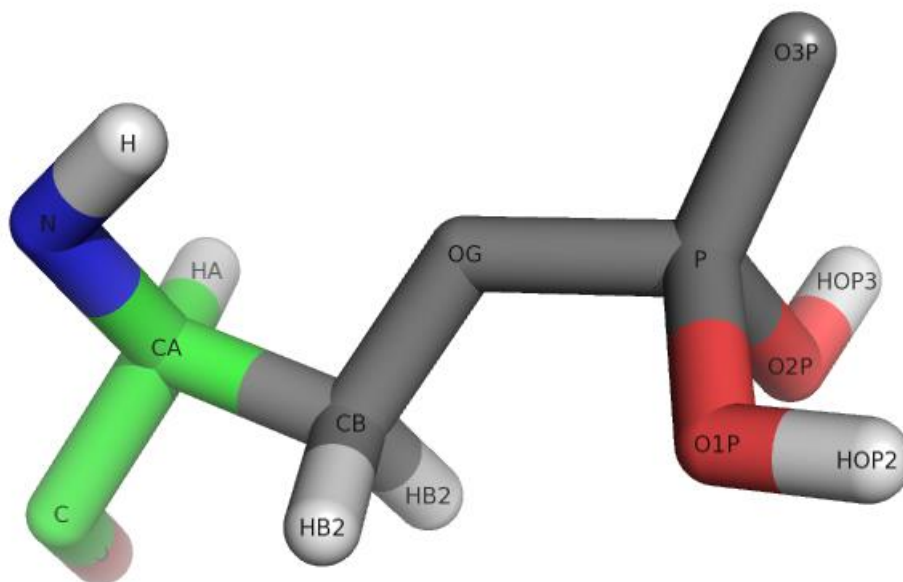

CT-N2-CM-N2 from antisymmetric dimethylarginine (DA2)

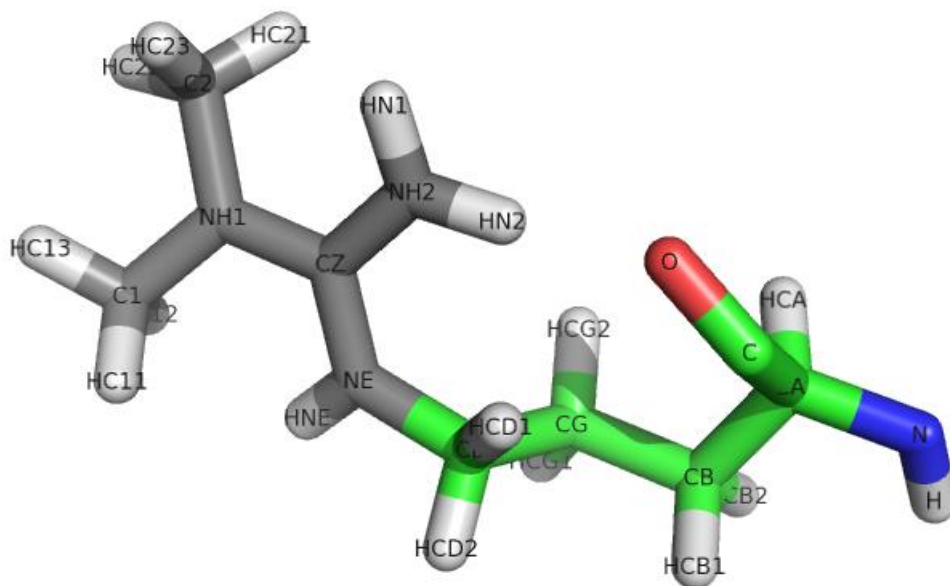

CT-CT-S-SH from cysteine persulfide (CSS)

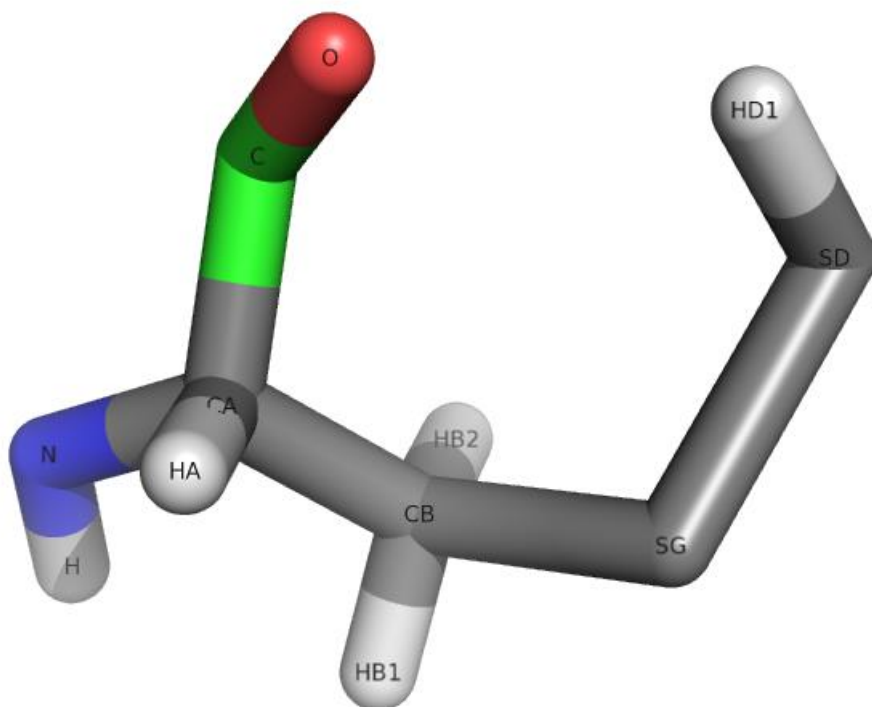

CT-S-SH-HS from cysteine persulfide (CSS)

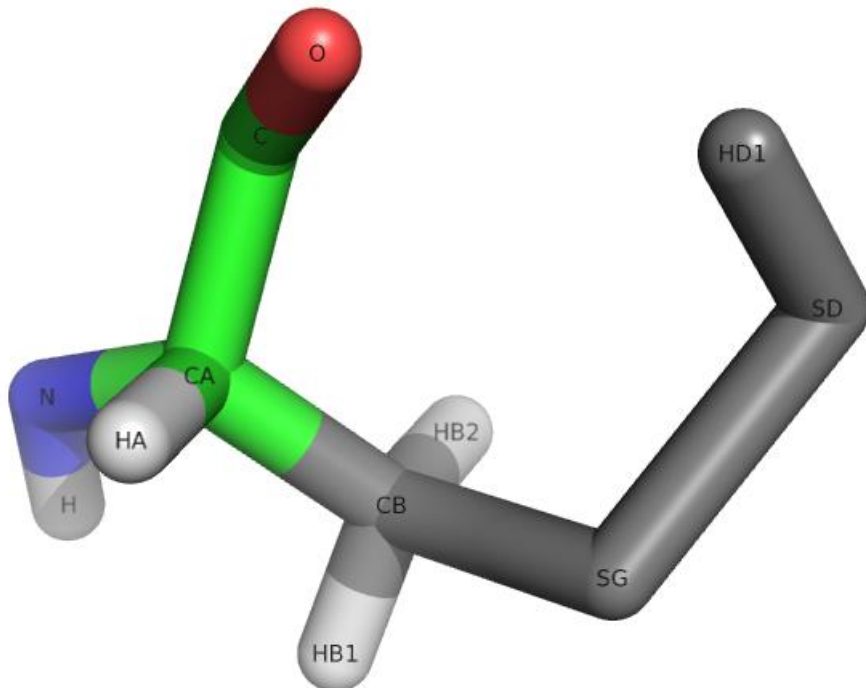

CT-S-P-O2 from neutral phosphocysteine (CSP)

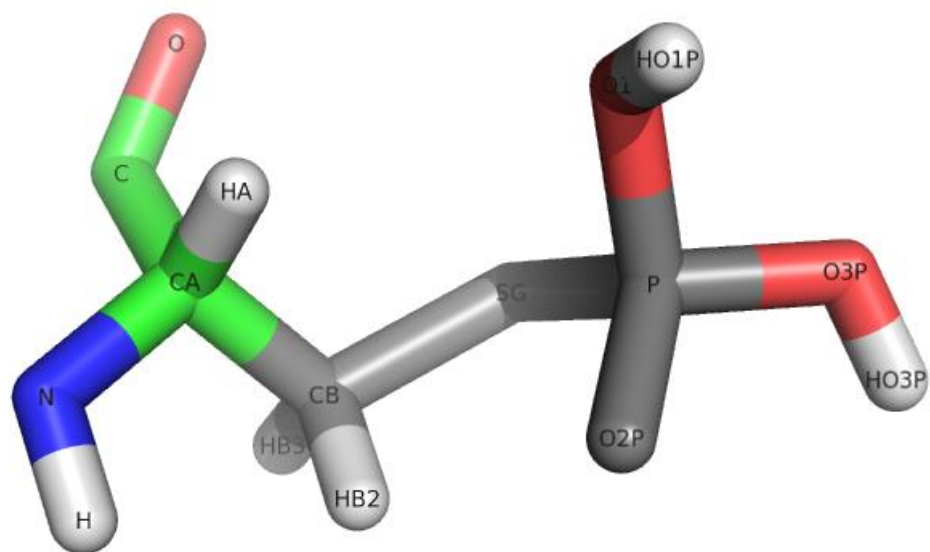

CN-CA-OH-HO from 7-hydroxytryptophan (OAF)

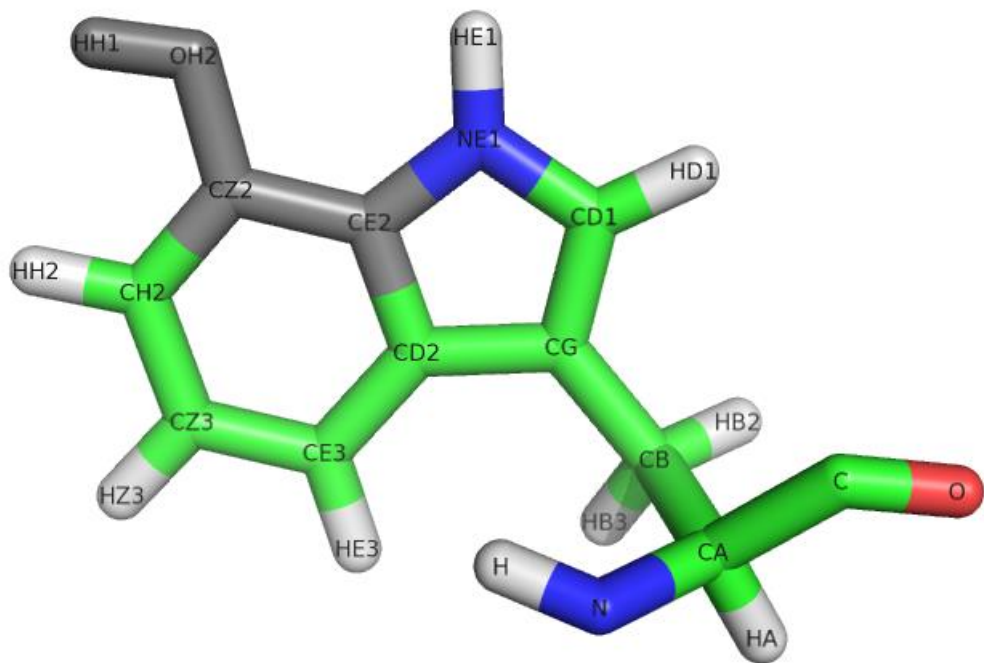

CA-OS-P-02 from phosphotyrosine (PTR)

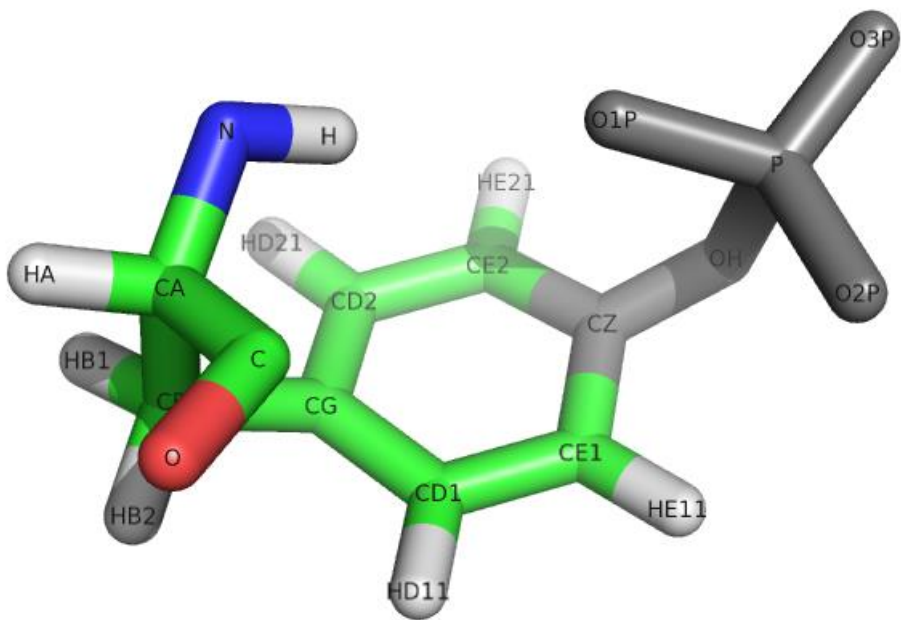

CA-OS-P-O2 from neutral phosphotyrosine (PTN)

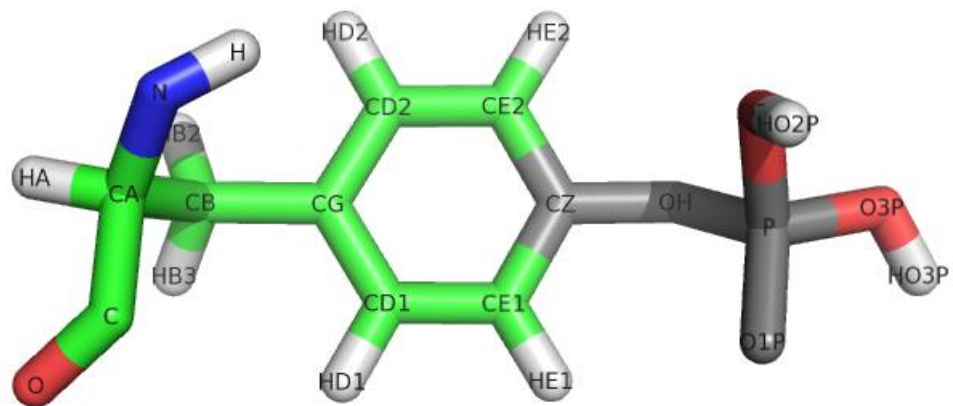

and CA-CA-OH-HO from 5-hydroxytryptophan (HTR).

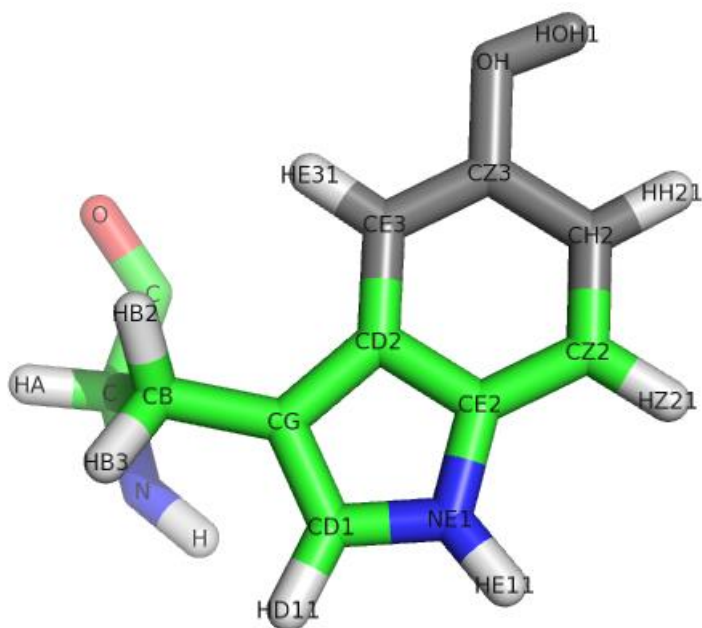

It should be noted in cases where there is a torsion with mixed atom types involved, such as in neutral phosphoserine (PTN), the entire phosphate group twists around and the correction is only applied to the single oxygen without the hydrogen (the double bonded one and not the hydroxyl hydrogens) since we observed corrections to these particular torsions will correct the rotation more significantly than the hydroxyl groups and the hydroxyl containing torsion will have little to no effect.



## References

- (1) Homeyer, N.; Horn, A.; Lanig, H.; Sticht, H. *J. Mol. Model.* **2006**, *12*, 281–289.
- (2) Frishman, D.; Argos, P. *Proteins: Struct , Funct , Bioinf* **1995**, *23*, 566–579.
- (3) Kabsch, W.; Sander, C. *Biopolymers* **1983**, *22*, 2577–2637.
- (4) DeLano, W. L. The PyMOL Molecular Graphics System. 2008.
- (5) Cock, P. J. A.; Antao, T.; Chang, J. T.; Chapman, B. A.; Cox, C. J.; Dalke, A.; Friedberg, I.; Hamelryck, T.; Kauff, F.; Wilczynski, B.; de Hoon, M. J. L. *Bioinformatics* **2009**, *25*, 1422–1423.
- (6) Guex, N.; Peitsch, M. C. *Electrophoresis* **1997**, *18*, 2714–2723.
- (7) Schwede, T.; Kopp, J.; Guex, N.; Peitsch, M. C. *Nucleic Acids Res* **2003**, *31*, 3381–3385.
- (8) Arnold, K.; Bordoli, L.; Kopp, J.; Schwede, T. *Bioinformatics* **2006**, *22*, 195–201.
- (9) Bayly, C. I.; Cieplak, P.; Cornell, W.; Kollman, P. A. *J. Phys. Chem.* **1993**, *97*, 10269–10280.
- (10) Frisch, M. J.; Trucks, G. W.; Schlegel, H. B.; Scuseria, G. E.; Robb, M. A.; Cheeseman, J. R.; Scalmani, G.; Barone, V.; Mennucci, B.; Petersson, G. A.; Nakatsuji, H.; Caricato, M.; Li, X.; Hratchian, H. P.; Izmaylov, A. F.; Bloino, J.; Zheng, G.; Sonnenberg, J. L.; Hada, M.; Ehara, M.; Toyota, K.; Fukuda, R.; Hasegawa, J.; Ishida, M.; Nakajima, T.; Honda, Y.; Kitao, O.; Nakai, H.; Vreven, T.; Montgomery, J. A., Jr.; Peralta, J. E.; Ogliaro, F.; Bearpark, M.; Heyd, J. J.; Brothers, E.; Kudin, K. N.; Staroverov, V. N.; Kobayashi, R.; Normand, J.; Raghavachari, K.; Rendell, A.; Burant, J. C.; Iyengar, S. S.; Tomasi, J.; Cossi, M.; Rega, N.; Millam, J. M.; Klene, M.; Knox, J. E.; Cross, J. B.;

Bakken, V.; Adamo, C.; Jaramillo, J.; Gomperts, R.; Stratmann, R. E.; Yazyev, O.; Austin, A. J.; Cammi, R.; Pomelli, C.; Ochterski, J. W.; Martin, R. L.; Morokuma, K.; Zakrzewski, V. G.; Voth, G. A.; Salvador, P.; Dannenberg, J. J.; Dapprich, S.; Daniels, A. D.; Farkas, .; Foresman, J. B.; Ortiz, J. V.; Cioslowski, J.; Fox, D. J. Gaussian 09 Revision D.01. Gaussian Inc. Wallingford CT 2009.

(11) Besler, B. H.; Merz, K. M.; Kollman, P. A. *J Comput Chem* **1990**, *11*, 431–439.

(12) Page, N.; Schall, N.; Strub, J.-M.; Quinternet, M.; Chaloin, O.; Décossas, M.; Cung, M. T.; Van Dorsselaer, A.; Briand, J.-P.; Muller, S. *PloS one* **2009**, *4*, e5273.
